# Supplementary material for: Tunable mono- or 1,1-double Heck-type coupling reaction of unconjugated amido-alkenes with remote benzylic C(sp 3 )–H of N -fluorobenzamides
Source: Royal Society of Chemistry journal article supplement (doi:10.1039/d4qo01971g), 2024-12-11
Supplement: d4qo01971g1.pdf [file d4qo01971g1.pdf]

## ***Supporting Information***

# **Tunable Mono- or 1,1-Double Heck-type Coupling Reaction of Unconjugated Amido-alkenes with Remote Benzylic C(sp<sup>3</sup>)-H of *N*-Fluorobenzamides**

Tianyu Lu,<sup>[a]</sup> Weixing Chang,<sup>[a]</sup> Jing Li,<sup>[a,b]</sup> Lingyan Liu\*<sup>[a]</sup>

<sup>[a]</sup> State Key Laboratory and Institute of Elemento-Organic Chemistry, National Engineering Research Center of Pesticide, Nankai University; College of Chemistry, Nankai University, Weijin Road 94#, Nankai District, Tianjin, 300071, China.

E-mail: [liulingyan@nankai.edu.cn](mailto:liulingyan@nankai.edu.cn)

<sup>[b]</sup> Collaborative Innovation Center of Chemical Science and Engineering (Tianjin), 300071, China.

E-mail: [lijing@nankai.edu.cn](mailto:lijing@nankai.edu.cn)

# Content

|                                                                                                                                                                |     |
|----------------------------------------------------------------------------------------------------------------------------------------------------------------|-----|
| <b>Table S1.</b> Optimization of catalyst and base on the 1,1-double Heck-type cross-coupling reaction of <b>1a</b> and <b>2a</b> . <sup>[a]</sup> .....       | 3   |
| <b>Table S2.</b> Optimization of solvent and temperature on the 1,1-double Heck-type cross-coupling reaction of <b>1a</b> and <b>2a</b> . <sup>[a]</sup> ..... | 4   |
| I. General Information .....                                                                                                                                   | 4   |
| II. Experiment Procedures .....                                                                                                                                | 5   |
| (1) Synthesis of Substrates .....                                                                                                                              | 5   |
| (a) Synthesis of <i>N</i> -( <i>tert</i> -butyl)amide <b>S1-3</b> .....                                                                                        | 5   |
| (b) Synthesis of <i>N</i> -( <i>tert</i> -butyl)- <i>N</i> -fluoroamides <b>1</b> .....                                                                        | 6   |
| (c) Synthesis of <i>N</i> -(quinolin-8-yl)but-3-enamides <b>2</b> .....                                                                                        | 7   |
| (2) Synthesis of product <b>3</b> .....                                                                                                                        | 8   |
| (3) Synthesis of product <b>4</b> .....                                                                                                                        | 9   |
| (4) Gram scale reaction .....                                                                                                                                  | 9   |
| (5) Derivative reactions .....                                                                                                                                 | 10  |
| (a) The removal experiment of <i>tert</i> -butyl protective group .....                                                                                        | 10  |
| (b) Removal of 8-aminoquinoline directing group .....                                                                                                          | 10  |
| (c) Double bond oxidation experiment .....                                                                                                                     | 11  |
| (d) Hydroamination reaction .....                                                                                                                              | 11  |
| (e) Double bond functionalization experiment .....                                                                                                             | 12  |
| (6) Specific operations of control experiments .....                                                                                                           | 12  |
| (a) Free radical capture experiment .....                                                                                                                      | 12  |
| (b) 1,5-HAT validation experiment .....                                                                                                                        | 13  |
| (c) Deuterium labeling experiment .....                                                                                                                        | 13  |
| (d) Heck coupling product transformation experiment .....                                                                                                      | 14  |
| III. Characterization Data of Compounds .....                                                                                                                  | 14  |
| IV. NMR spectra of synthesized compounds .....                                                                                                                 | 33  |
| V. The Oretical Calculation Data .....                                                                                                                         | 69  |
| (1) Computational details .....                                                                                                                                | 69  |
| (2) Cartesian Coordinates .....                                                                                                                                | 70  |
| References .....                                                                                                                                               | 113 |

**Table S1.** Optimization of catalyst and base on the 1,1-double Heck-type cross-coupling reaction of **1a** and **2a**.<sup>a</sup>

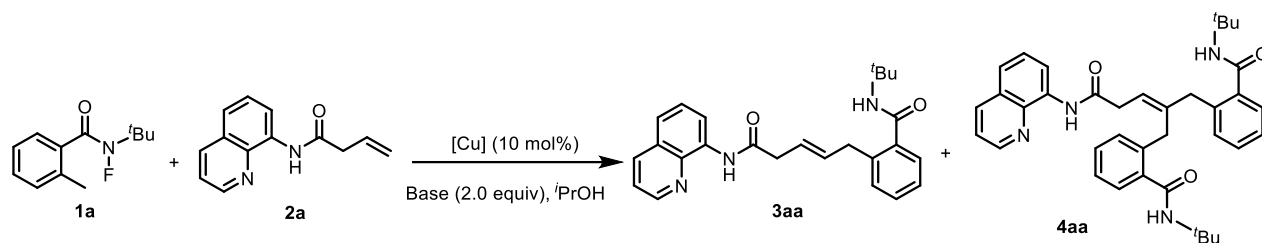

| Entry    | Catalyst                                                      | Base                           | Yield of <b>3aa</b> (%) | Yield of <b>4aa</b> (%) |
|----------|---------------------------------------------------------------|--------------------------------|-------------------------|-------------------------|
| 1        | Cu(OAc) <sub>2</sub>                                          | /                              | 46                      | 22                      |
| 2        | Cu(OAc) <sub>2</sub>                                          | Et <sub>3</sub> N              | 4                       | 42                      |
| 3        | Cu(OAc) <sub>2</sub>                                          | DABCO                          | 11                      | 12                      |
| 4        | Cu(OAc) <sub>2</sub>                                          | DBU                            | 10                      | 12                      |
| 5        | Cu(OAc) <sub>2</sub>                                          | DIPEA                          | 30                      | 35                      |
| 6        | Cu(OAc) <sub>2</sub>                                          | K <sub>3</sub> PO <sub>4</sub> | trace                   | Trace                   |
| 7        | Cu(OAc) <sub>2</sub>                                          | Et <sub>2</sub> NH             | trace                   | trace                   |
| <b>8</b> | <b>Cu(CH<sub>3</sub>CN)<sub>4</sub>PF<sub>6</sub></b>         | <b>Et<sub>3</sub>N</b>         | <b>8</b>                | <b>55</b>               |
| 9        | Cu(CH <sub>3</sub> CN) <sub>4</sub> BF <sub>4</sub>           | Et <sub>3</sub> N              | 10                      | 45                      |
| 10       | CuCl                                                          | Et <sub>3</sub> N              | trace                   | 5                       |
| 11       | CuCl <sub>2</sub>                                             | Et <sub>3</sub> N              | 15                      | 10                      |
| 12       | CuI                                                           | Et <sub>3</sub> N              | trace                   | trace                   |
| 13       | CuBr                                                          | Et <sub>3</sub> N              | trace                   | trace                   |
| 14       | Cu(CH <sub>3</sub> CN) <sub>4</sub> PF <sub>6</sub> (20 mol%) | Et <sub>3</sub> N              | 15                      | 38                      |
| 15       | Cu(CH <sub>3</sub> CN) <sub>4</sub> PF <sub>6</sub> (5 mol%)  | Et <sub>3</sub> N              | 7                       | 52                      |

<sup>a</sup> The yields were determined by <sup>1</sup>H NMR of crude product with C<sub>6</sub>H<sub>5</sub>CHO as an internal standard sample. DABCO: 1,4-diazabicyclo[2.2.2]octane. DBU: 1,8-diazabicyclo[5.4.0]undec-7-ene. DIPEA: Diisopropylethylamine. N. R.: no reaction.

**Table S2.** Optimization of solvent and temperature on the 1,1-double Heck-type cross-coupling reaction of **1a** and **2a**.<sup>a</sup>

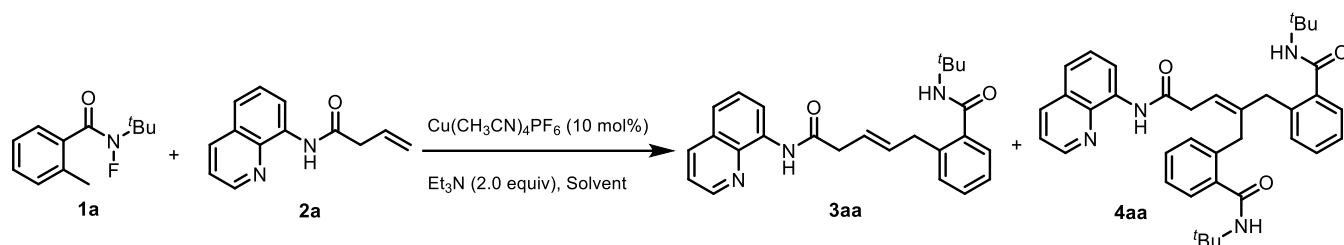

| Entry     | Temp (°C) | Solvent                                  | Yield of <b>3aa</b> (%) | Yield of <b>4aa</b> (%)      |
|-----------|-----------|------------------------------------------|-------------------------|------------------------------|
| 1         | 80        | <i>i</i> PrOH                            | N. R.                   | N. R.                        |
| 2         | 85        | <i>i</i> PrOH                            | 22                      | 40                           |
| 3         | 95        | <i>i</i> PrOH                            | 10                      | 55                           |
| 4         | 90        | CH <sub>3</sub> CN                       | 22                      | 39                           |
| 5         | 90        | Dioxane                                  | trace                   | trace                        |
| 6         | 90        | DMSO                                     | N. R.                   | N. R.                        |
| 7         | 90        | DMF                                      | N. R.                   | N. R.                        |
| 8         | 90        | DCE                                      | 10                      | 12                           |
| 9         | 90        | CH <sub>3</sub> CN/ <i>i</i> PrOH=1:1    | 11                      | 60                           |
| 10        | 90        | CH <sub>3</sub> CN/ <i>i</i> PrOH=1:2    | 12                      | 70                           |
| <b>11</b> | <b>90</b> | <b>CH<sub>3</sub>CN/<i>i</i>PrOH=1:3</b> | <b>9</b>                | <b>74 (71<sup>[b]</sup>)</b> |

<sup>a</sup> The yields were determined by <sup>1</sup>H NMR of crude product with C<sub>6</sub>H<sub>5</sub>CHO as an internal standard sample.

N. R.: no reaction. <sup>b</sup> Isolated yield.

## I. General Information

Unless otherwise noted, reagents and solvents were purchased from commercial suppliers (such as Energy Chemical Corporation, J&K Scientific, Tianjin Xiensi Biochemical Technology Co., Ltd. etc.) and

used without further purification.  $^1\text{H}$  NMR,  $^{13}\text{C}$  NMR and  $^{19}\text{F}$  NMR spectra were recorded at 25 °C on Bruker Advance 400M NMR spectrometers ( $\text{CDCl}_3$ ). Chemical shifts for  $^1\text{H}$  NMR spectra were reported as  $\delta$  in parts per million (ppm) downfield from  $\text{SiMe}_4$  ( $\delta$  0.00) and relative to the signal of  $\text{CDCl}_3$  residual peak ( $\delta$  7.26 singlet). Multiplicities were given as: s (singlet); d (doublet); t (triplet); q (quartet); dd (doublet of doublets); dt (doublet of triplets); m (multiplets) etc. Chemical shifts for  $^{13}\text{C}$  NMR spectra were reported as  $\delta$  in parts per million (ppm) downfield from  $\text{SiMe}_4$  ( $\delta$  0.00) and relative to the signal of  $\text{CDCl}_3$  ( $\delta$  77.2 triplet). Coupling constants were reported as J value in Hz. High-resolution mass spectral analysis (HRMS) was performed on Waters Xevo G2-XS using electrospray ionization (ESI). Chromatography was performed using 200-300 mesh silica gel with the indicated solvent system. Melting points were measured by X-5 Micro Melting Point Detector.

## II. Experiment Procedures

### (1) Synthesis of Substrates

#### (a) Synthesis of *N*-(*tert*-butyl)amide **S1-3**

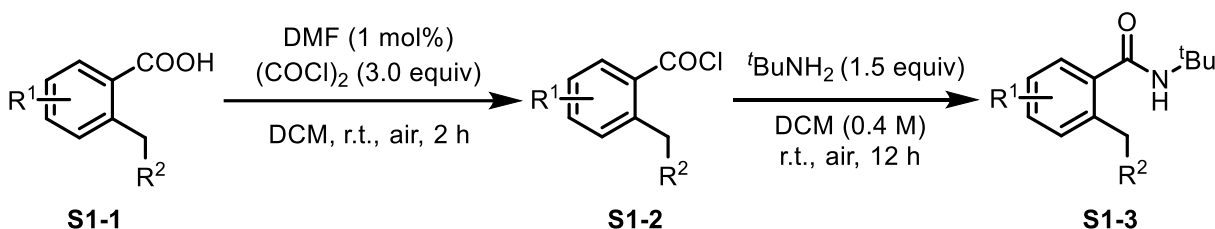

To a stirred solution of **S1-1** (10 mmol, 1.0 equiv) and *N,N*-Dimethylformamide (DMF, 1 mol%) in dichloromethane (DCM, 10 mL) at room temperature under air atmosphere in a round-bottom flask,  $(\text{COCl})_2$  (3.81 g, 30 mmol, 3.0 equiv) was added dropwise and the reaction was stirred for at least 2 h until no bubbles emerge from the system. Then, the solution was filtered and concentrated under reduced pressure directly to remove excess  $(\text{COCl})_2$  and DCM. The crude residue (**S1-2**) was directly applied to next step without further purification. DCM (40 mL) was re-added to the crude product and  $^t\text{BuNH}_2$  (1.83 g, 25 mmol, 2.5 equiv) was added dropwise, the reaction was stirred for another 12 h until the complete consumption of starting material. After completion, the mixture was filtered and concentrated under reduced pressure. The residual solid was purified by flash chromatography on silica gel to afford *N*-(*tert*-butyl)amide **S1-3**.

(b) Synthesis of *N*-(*tert*-butyl)-*N*-fluoroamides **1**

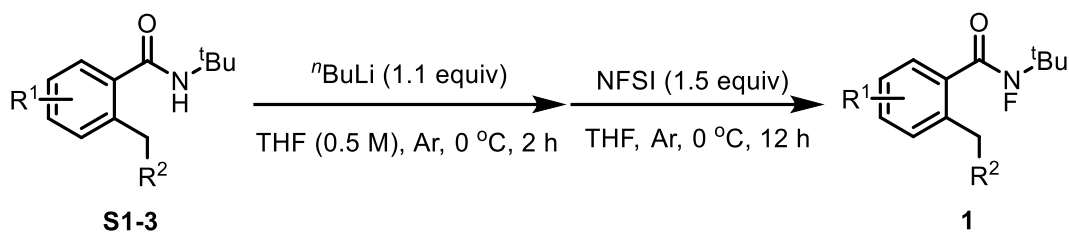

All the following *N*-F amides **1** (5 mmol) were synthesized according to the reported procedure.<sup>1</sup> To a Schlenk tube containing **S1-3** was added anhydrous THF (50 mL) under argon atmosphere, the mixture was stirred until **S1-3** was completely dissolved and the solution was cooled down to 0 °C with the aid of cryogenic reactors. *n*BuLi (1.1 equiv, 2.5 M solution in *n*-hexane) was added dropwise and the reaction was stirred for 2 h. *N*-Fluorobenzenesulfonimide (NFSI) (2.37 g, 1.5 equiv, 0.7 M in THF) was added dropwise (~ 1 drop/sec). The resulting mixture was stirred at 0 °C overnight and then allowed to warm up to room temperature. After 12 h, the reaction was quenched with 1 M HCl aqueous. The resulting mixture was diluted with EA (50 mL) and water (50 mL). The two layers were separated and the aqueous layer was extracted with EA three times (50 mL). The combined organic layers were washed with saturated Na<sub>2</sub>CO<sub>3</sub> aqueous and then saturated NaCl aqueous, dried over anhydrous MgSO<sub>4</sub> for 30 min, filtered and concentrated under reduced pressure. The expected product *N*-fluoroamides **1** were obtained through purification by column chromatography on silica gel in 23%-37% yield.

List of *N*-fluorobenzamides **1**

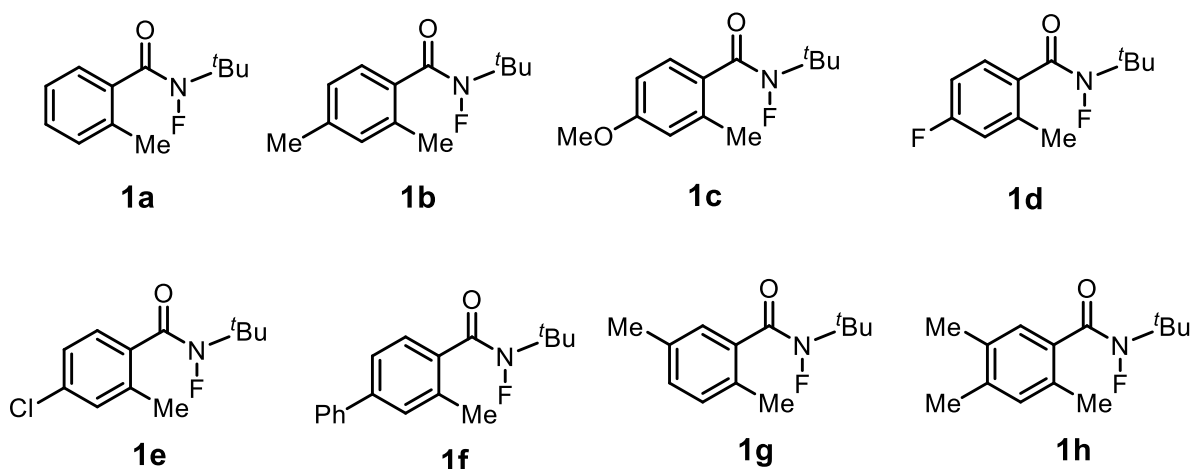

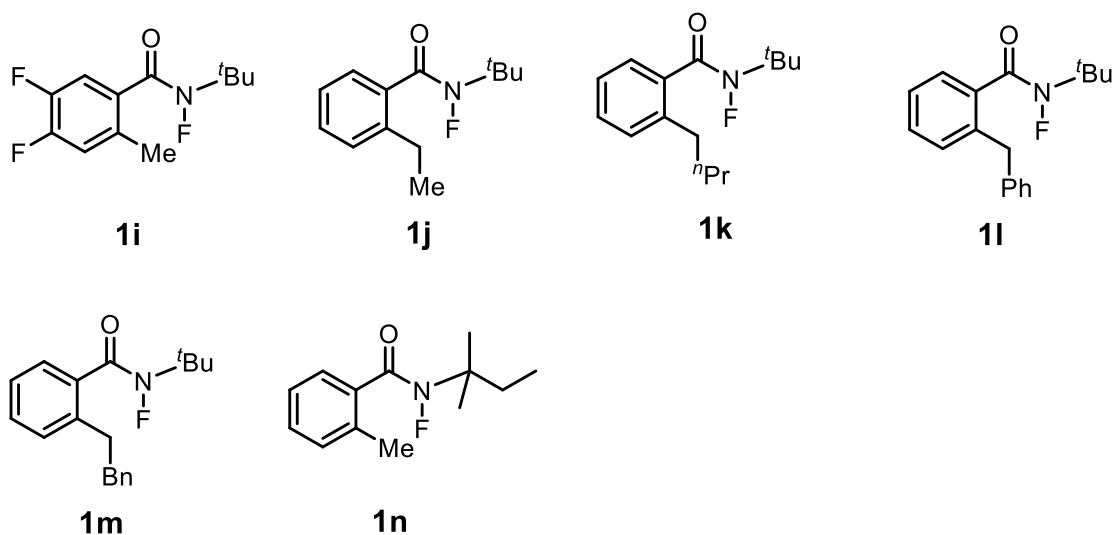

(c) Synthesis of *N*-(quinolin-8-yl)but-3-enamides **2**

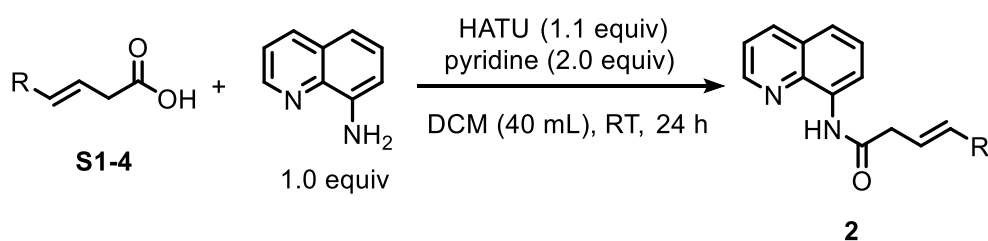

The substrates *N*-(quinolin-8-yl)but-3-enamides **2** were synthesized according to the reported procedure.<sup>2</sup> The acid **S1-4** (5 mmol) was charged into a 100 mL flask containing 20 mL DCM. 8-Aminoquinoline (649 mg, 4.5 mmol, 1.0 equiv), pyridine (0.73 mL, 9.0 mmol, 2.0 equiv), and 2-(7-azabenzotriazol-1-yl)-*N,N,N',N'*-tetramethyluronium hexafluorophosphate (HATU, 1.90 g, 5.0 mmol, 1.1 equiv) were added sequentially, and the reaction was stirred at ambient temperature for 16 h. The deep brown solution was quenched with sat. NaHCO<sub>3</sub> (15 mL) and extracted with DCM. The combined organic layers were washed with brine and dried over anhydrous Na<sub>2</sub>SO<sub>4</sub>, concentrated in vacuo and purified by column chromatography (PE/EA = 20:1) to afford the desired products **2** in 25%-75% yields.

List of unactivated alkenes **2**

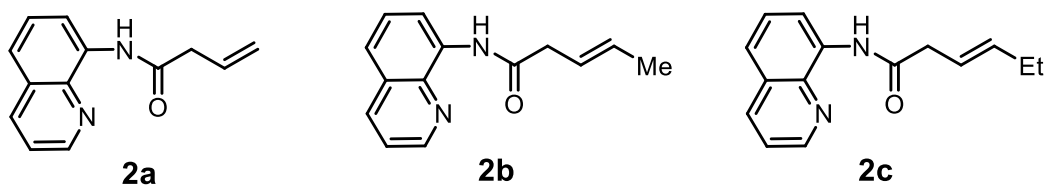

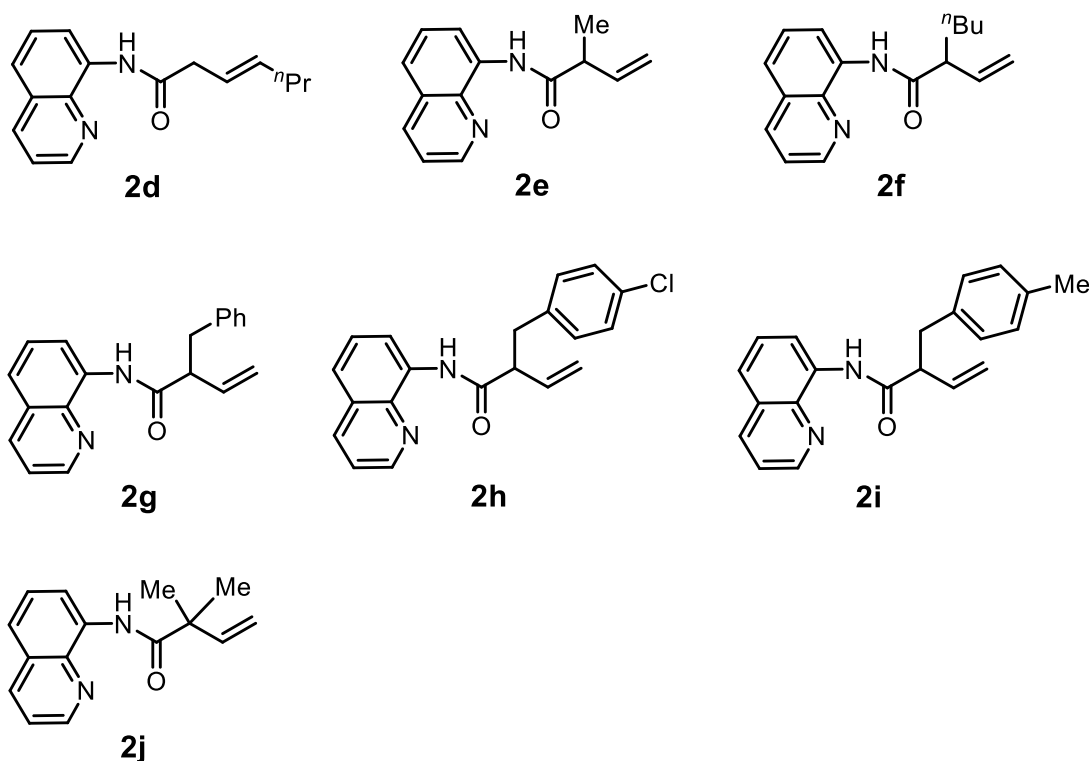

## (2) Synthesis of product **3**

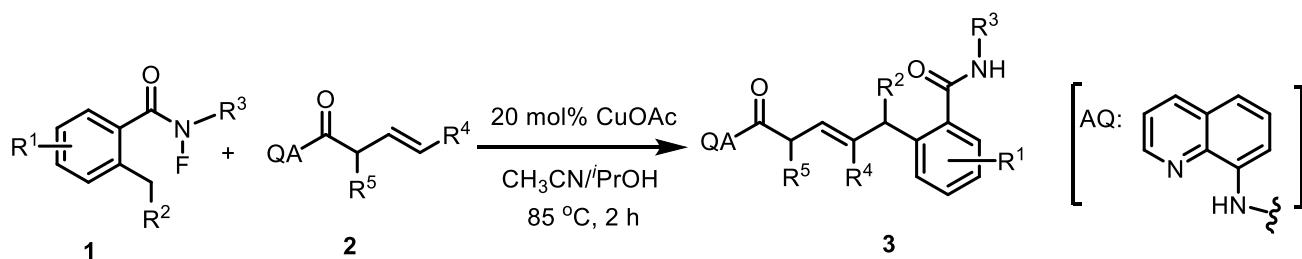

To a reaction tube containing 1 mL of solvent (CH<sub>3</sub>CN/*i*PrOH=1:3) was added unactivated alkene **2** (0.2 mmol, 2.0 equiv), CuOAc (2.5 mg, 0.02 mmol, 20 mol %), the mixture was stirred for 20 min at the room temperature, in that order, the *N*-fluorobenzamide **1** was added (0.1 mmol, 1.0 equiv) and the mixture was reacted for another 2 h at 85 °C. After that process, the resulting mixture was filtrated by a sand core funnel filled with silica gel and wash with dichloromethane (3×5 mL). The combined filtrates were concentrated under vacuum and purified by column chromatography on silica gel to give the product **3**.



### (3) Synthesis of product 4

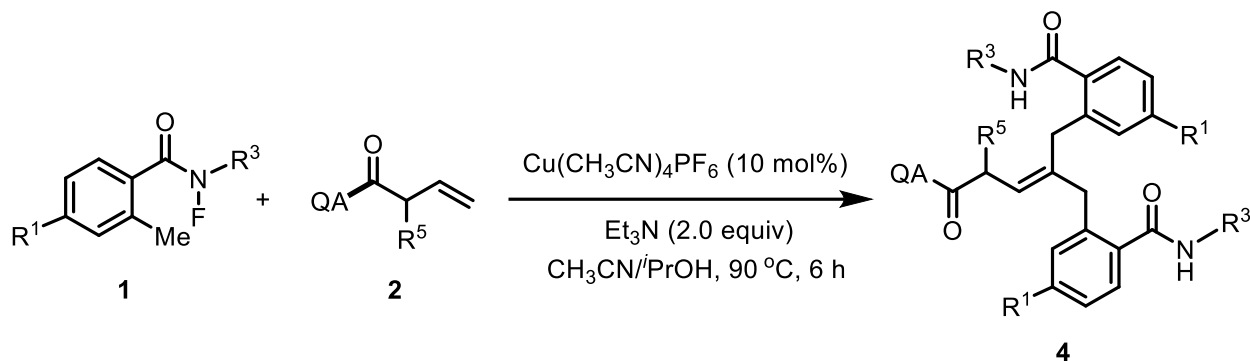

The unactivated alkene **2** (0.1 mmol, 1.0 equiv),  $\text{Cu}(\text{MeCN})_4\text{PF}_6$  (3.77 mg, 0.01 mmol, 10 mol %) and  $\text{Et}_3\text{N}$  (20.2 mg, 0.2 mmol, 2.0 equiv) were sequentially added into a reaction tube with the solvents (1 mL,  $\text{CH}_3\text{CN}/i\text{PrOH}=1:3$ ), the mixture was stirred for 20 min at room temperature, and the *N*-fluorobenzamide **1** (0.3 mmol, 3.0 equiv) was then added and stirred for another 6 h at  $90^\circ\text{C}$ . After that process, the resulting mixture was filtrated by a sand core funnel filled with silica gel and wash with DCM (3×5 mL). The combined filtrates were concentrated under vacuum and purified by column chromatography on silica gel to afford the corresponding product **4**.

### (4) Gram scale reaction

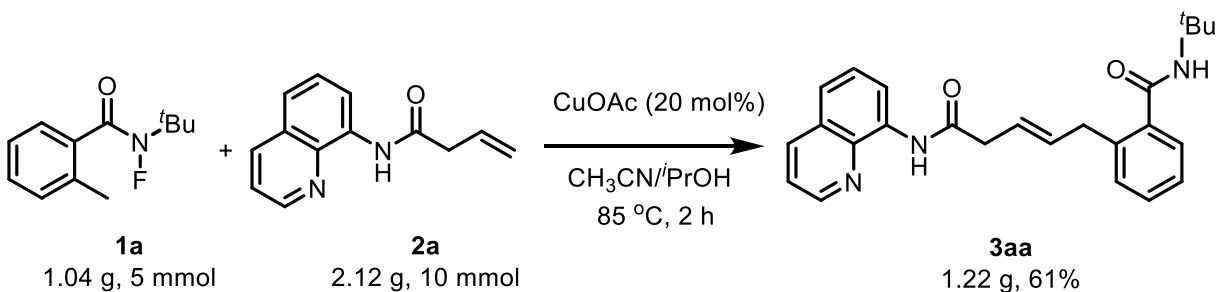

To a Schlenk tube containing 50 mL of the solvent ( $\text{CH}_3\text{CN}/i\text{PrOH}=1:3$ ) were added **2a** (2.12 g, 10 mmol, 2.0 equiv),  $\text{CuOAc}$  (122 mg, 1 mmol, 20 mol %), the mixture was stirred for 20 min at room temperature, in that order, the **1a** (1.04 g, 5 mmol, 1.0 equiv) was added and reacted for 2 h at  $85^\circ\text{C}$ . After that process, the resulting mixture was filtrated by a sand core funnel filled with silica gel and wash with DCM (100 mL). The combined filtrates were concentrated under vacuum and purified by column chromatography on silica gel.

## (5) Derivative reactions

### (a) The removal experiment of *tert*-butyl protective group

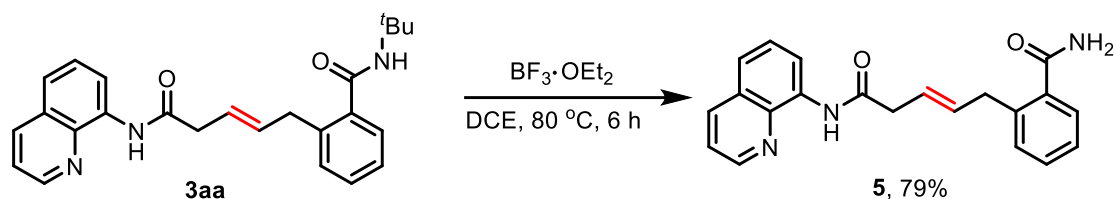

To a Schlenk tube containing 1 mL DCE was added **3aa** (40.1 mg, 0.1 mmol), the mixture was stirred for 20 min at room temperature, in that order, Boron trifluoride etherate (0.5 mmol) was added and reacted for 6 h at the  $80^\circ\text{C}$ . After that process, an excess saturated solution of sodium carbonate was added to quench the reaction, then adding 5 mL dichloromethane to extract the reaction system for three times (3×5 mL), combining the organic phases, washing with saturated brine, drying with anhydrous  $\text{Na}_2\text{SO}_4$ , filtering and concentrating to give the residual, followed by the purification by the silica-gel column chromatography with PE/EA=1:1 to give the compound **5** as a colorless liquid in 79% yield (27.3 mg).

### (b) Removal of 8-aminoquinoline directing group

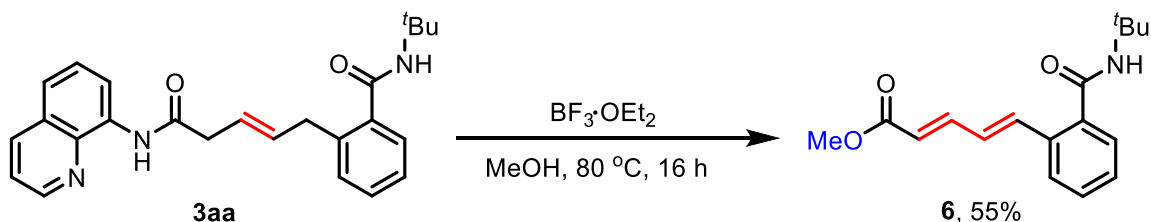

To a Schlenk tube containing 1 mL MeOH was added **3aa** (40.1 mg, 0.1 mmol), the mixture was stirred for 20 min at the room temperature, in that order, Boron trifluoride etherate (70.6 mg, 0.5 mmol) was added and reacted for 16 h at  $80^\circ\text{C}$ . After that process, an excess saturated solution of sodium carbonate was added to quench the reaction, then adding 5 mL dichloromethane to extract the reaction system for three times (3×5 mL), combining the organic phases, washing with saturated brine, drying with anhydrous  $\text{Na}_2\text{SO}_4$ , filtering and concentrating to give the residual, followed by the purification by the silica-gel column chromatography with PE/EA=10:1 to generate the compound **6** as white solid (15.8 mg, yield 55%) with the removal of AQ directing group and the esterification and oxidative dehydrogenation.

(c) Double bond oxidation experiment

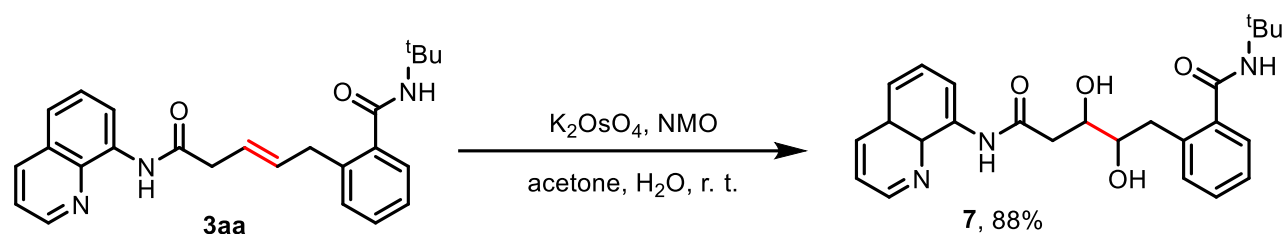

To a Schlenk tube containing 1 mL of the solvent (Acetone/ $H_2O$ =1:1) were added **3aa** (40.1 mg, 0.1 mmol), the mixture was stirred for 20 min at room temperature, in that order, added potassium osmate (3.7 mg, 0.01 mmol, 10 mmol %), 4-methylmorpholine *N*-oxide (23.4 mg, 0.2 mmol, 2.0 equiv) and reacted for 16 h at the 80 °C. After that process, add an excess saturated solution of sodium carbonate to quench the reaction, then add 5 mL of dichloromethane to extract the reaction system three times, merge the organic phases, wash with saturated salt water, spin dry, followed by the purification by the silica-gel column chromatography with PE/EA=1:1 to generate the compound **7** as white solid (26.3 mg, yield 88%).

(d) Hydroamination reaction

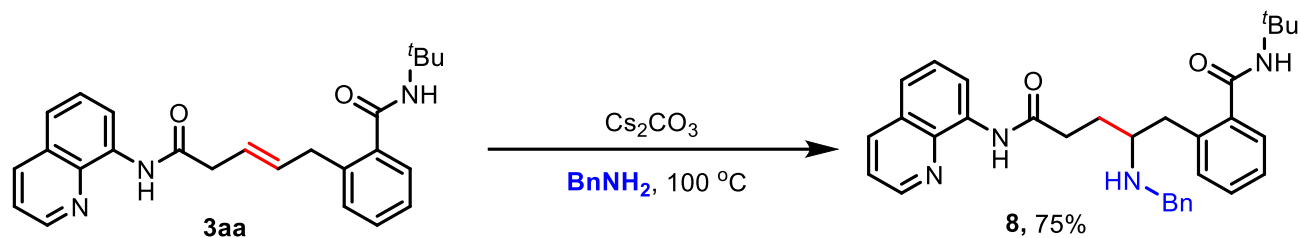

To a Schlenk tube containing 0.1 mL of the  $BnNH_2$  were added **3aa** (0.1 mmol, 20.9 mg), in that order, added  $Cs_2CO_3$  (0.01 mmol, 3.5 mg, 10 mmol %) and reacted for 16 h at the 80 °C. After that process, add an excess saturated solution of sodium carbonate to quench the reaction, then add 5 mL of dichloromethane to extract the reaction system three times, merge the organic phases, wash with saturated salt water, spin dry, and purify the column with PE/EA=5:1 to give the compound **8** as colorless liquid (38.1 mg, yield 75%).

### (e) Double bond functionalization experiment

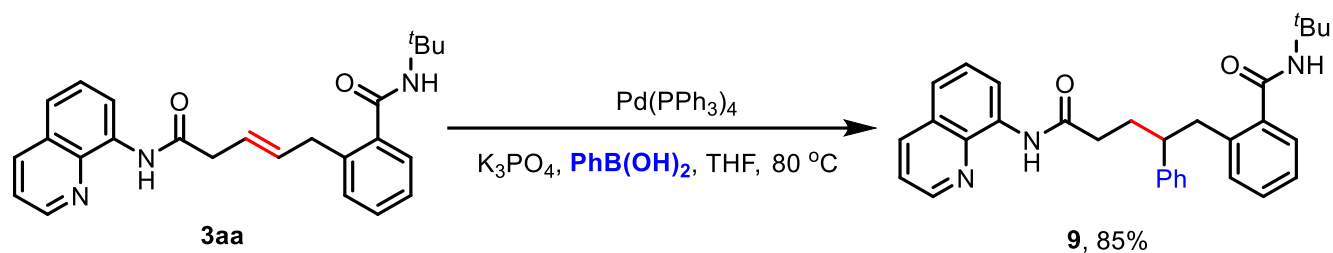

To a Schlenk tube containing 1 mL of the THF was added **3aa** (40.1 mg, 0.1 mmol), the mixture was stirred for 20 min at the room temperature, in that order, added Pd(PPh<sub>3</sub>)<sub>4</sub> (3.5 mg, 0.005 mmol, 5 mmol %), K<sub>3</sub>PO<sub>4</sub> (42.4 mg, 0.2 mmol, 2.0 equiv), PhB(OH)<sub>2</sub> (18.2 mg, 0.15 mmol, 1.5 equiv) and reacted for 16 h at 80 °C. After that process, add an excess saturated solution of sodium carbonate to quench the reaction, then add 5 mL of dichloromethane to extract the reaction system three times, merge the organic phases, wash with saturated salt water, spin dry, and purify the column with PE/EA=5:1 to generate the compound **9** as a white solid (26.4 mg, yield 85%).

### (6) Specific operations of control experiments

#### (a) Free radical capture experiment

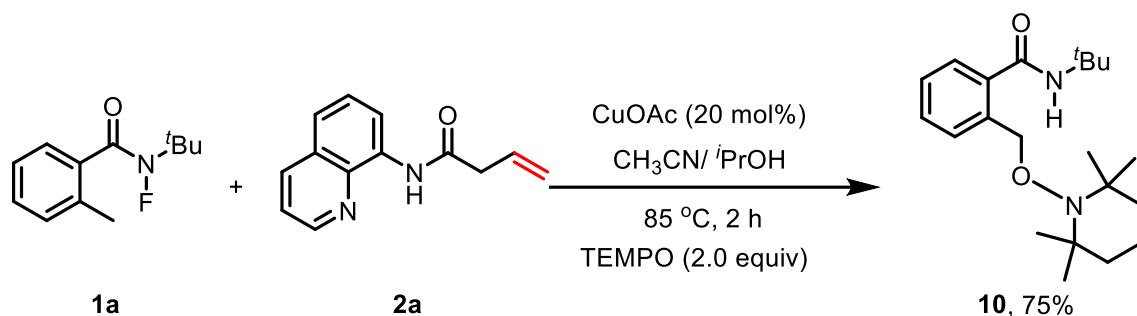

To a Schlenk tube containing 1 mL of the solvent (CH<sub>3</sub>CN/*i*PrOH=1:3) were added **2** (0.2 mmol, 2.0 equiv), CuOAc (2.5 mg, 0.02mmol, 20 mol %), the mixture was stirred for 20 min at the room temperature, in that order, added **1a** (20.9 mg, 0.1 mmol), 2,2,2,6,6-tetramethylpyridine oxide (TEMPO) (31.2 mg, 0.2 mmol, 2.0 equiv) and reacted for 2 h at the 85 °C. After that process, the resulting mixture was filtrated by a sand core funnel filled with silica gel and wash with DCM (5 mL). The combined filtrates were concentrated under vacuum and purified by column chromatography on silica gel. The product resulting from the TEMPO-mediated reaction with **1a** was isolated with a yield of 75% (26.0 mg).

(b) 1,5-HAT validation experiment

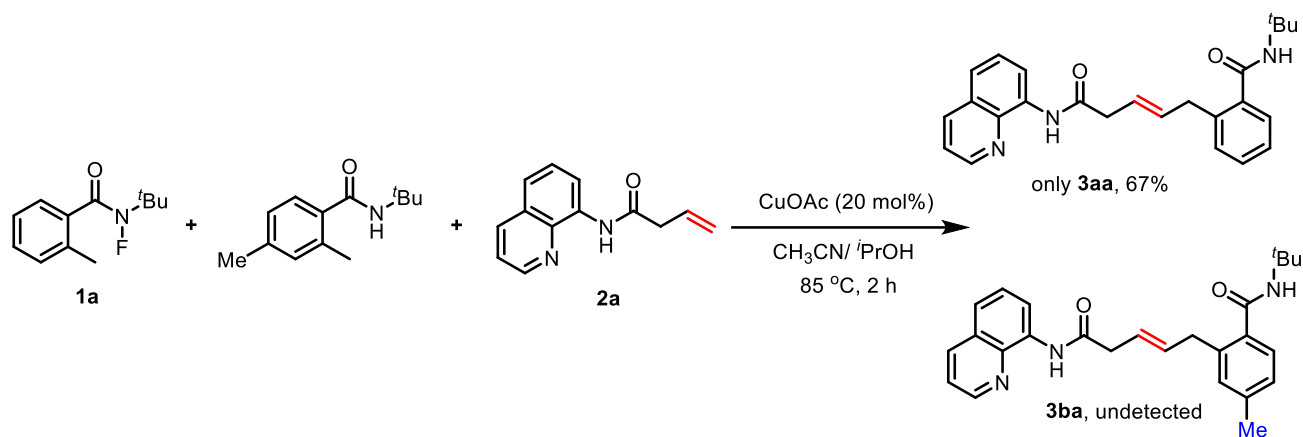

Add 8-aminoquinoline amide **2a** (42.4 mg, 0.2 mmol, 2.0 equiv), *N*-fluoromethylbenzamide **1a** (20.9 mg, 0.1 mmol), 2,4-dimethylbenzamide, and cuprous acetate (2.5 mg, 0.02 mmol, 20 mol%) to a 10 mL Schlenk tube containing a stirring magnet. Finally, add 1 mL of CH<sub>3</sub>CN/*i*PrOH=1:3 solvent and react for 2 h at 85 °C (oil bath). TLC point plate monitoring reaction, filtration of the reaction system, spin drying, addition of 5 mL of dichloromethane solvent, washing with saturated salt water, organic phase drying, spin drying, column purification with PE/EA=10:1, only 67% yield of **3aa** (26.9 mg) was obtained, and no other product was generated.

(c) Deuterium labeling experiment

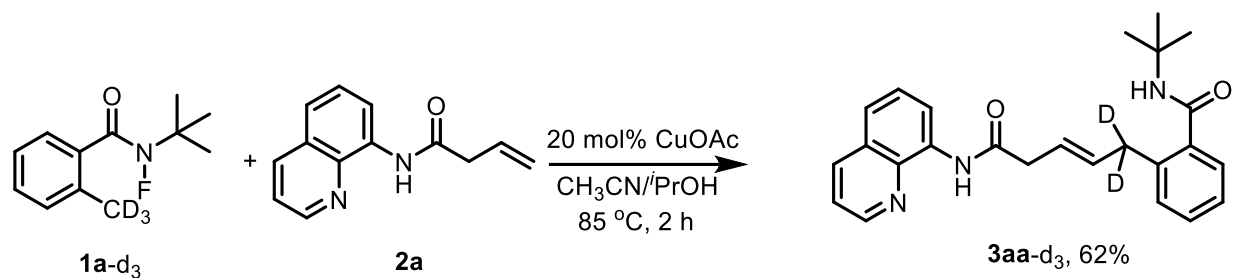

To a Schlenk tube containing 1 mL of the solvent (CH<sub>3</sub>CN/*i*PrOH=1:3) were added **2a** (0.2 mmol, 2.0 equiv), CuOAc (2.5 mg, 0.02 mmol, 20 mol %), the mixture was stirred for 20 min at the room temperature, in that order, added **1a-d<sub>3</sub>** (21.2 mg, 0.1 mmol) and reacted for 2 h at the 85 °C. After that process, the resulting mixture was filtrated by a sand core funnel filled with silica gel and wash with DCM (5 mL). The combined filtrates were concentrated under vacuum and purified by column chromatography on silica gel, 25.1 mg of **3aa-d<sub>3</sub>** was obtained, with a yield of 62%.

(d) Heck coupling product transformation experiment

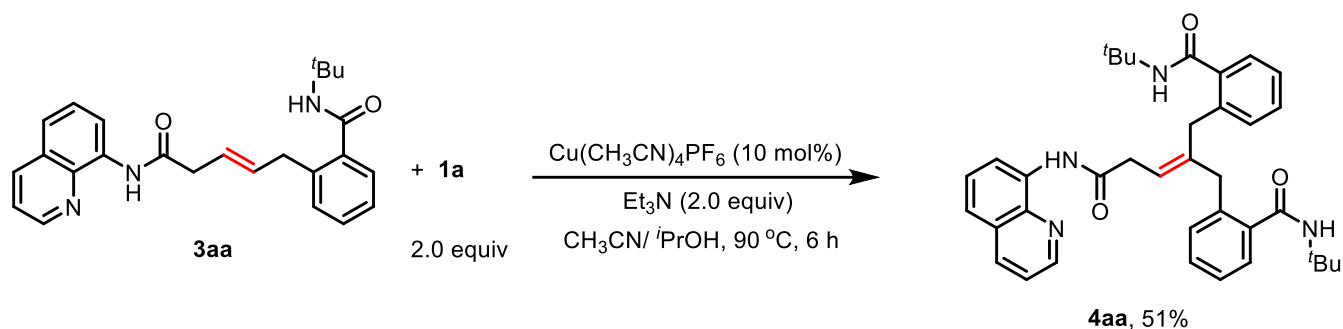

To a Schlenk tube containing 1 mL of the solvent ( $\text{CH}_3\text{CN}/i\text{PrOH}=1:3$ ) were added **3aa** (0.1 mmol, 1.0 equiv),  $\text{Cu}(\text{MeCN})_4\text{PF}_6$  (3.77 mg, 0.01 mmol, 10 mol %) and  $\text{Et}_3\text{N}$  (20.2 mg, 0.2 mmol, 2.0 equiv), the mixture was stirred for 20 min at the room temperature, in that order, added **1a** (41.8 mg, 0.2 mmol) and reacted for 6 h at the  $90^\circ\text{C}$ . After that process, the resulting mixture was filtrated by a sand core funnel filled with silica gel and wash with DCM (5 mL). The combined filtrates were concentrated under vacuum and purified by column chromatography on silica gel, 30.1 mg of **4aa** was obtained, with a yield of 51%.

### III. Characterization Data of Compounds

**(3aa) (*E*)-*N*-(*tert*-butyl)-2-(5-(naphthalen-1-ylamino)-5-oxopent-2-en-1-yl) benzamide**

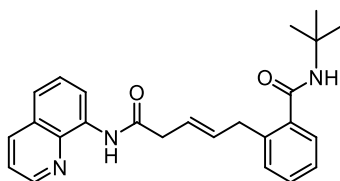

Colorless liquid, 27.7 mg, yield 69%.  $^1\text{H NMR}$  (400 MHz,  $\text{CDCl}_3$ )  $\delta$  9.95 (s, 1H), 8.78 – 8.73 (m, 1H), 8.72 – 8.67 (m, 2H), 8.18 – 8.13 (m, 1H), 7.57 – 7.48 (m, 2H), 7.44 (dd,  $J = 7.4, 3.4$  Hz, 2H), 7.35 (q,  $J = 7.6$  Hz, 3H), 7.28 – 7.21 (m, 2H), 6.04 (td,  $J = 15.4, 5.9$  Hz, 1H), 5.82 – 5.70 (m, 2H), 3.66 (d,  $J = 6.4$  Hz, 2H), 3.30 (d,  $J = 7.1$  Hz, 2H), 1.38 (s, 9H).  $^{13}\text{C NMR}$  (101 MHz,  $\text{CDCl}_3$ )  $\delta$  169.7, 169.6, 148.3, 138.6, 138.0, 137.4, 136.5, 135.7, 134.5, 130.6, 129.8, 128.1, 127.5, 127.1, 126.4, 124.0, 121.7, 116.6, 51.9, 42.1, 36.4, 28.9. **HRMS (ESI)** calcd for  $\text{C}_{25}\text{H}_{28}\text{N}_3\text{O}_2$   $[\text{M}+\text{H}]^+$ : 402.2177; found 402.2178.

**(3ba) (*E*)-*N*-(*tert*-butyl)-4-methyl-2-(5-oxo-5-(quinolin-8-ylamino)pent-2-en-1-yl)benzamide**

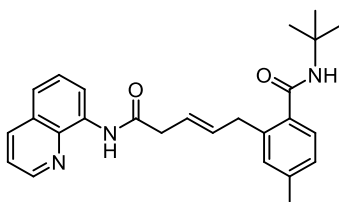

Colorless liquid, 29.6 mg, yield 71%. **<sup>1</sup>H NMR** (400 MHz, CDCl<sub>3</sub>) δ 9.93 (s, 1H), 8.73 (d, *J* = 6.7 Hz, 1H), 8.66 (s, 1H), 8.13 (d, *J* = 7.8 Hz, 1H), 7.53 – 7.46 (m, 2H), 7.42 (dt, *J* = 7.6, 3.4 Hz, 1H), 7.25 (s, 1H), 7.09 (s, 1H), 7.02 (d, *J* = 8.0 Hz, 1H), 6.01 (td, *J* = 15.6, 5.7 Hz, 1H), 5.80 – 5.67 (m, 2H), 3.61 (d, *J* = 4.7 Hz, 2H), 3.28 (d, *J* = 7.2 Hz, 2H), 2.27 (s, 3H), 1.34 (s, 9H). **<sup>13</sup>C NMR** (101 MHz, CDCl<sub>3</sub>) δ 169.7, 148.4, 139.8, 138.5, 137.4, 136.5, 135.8, 135.2, 134.5, 131.2, 128.0, 127.5, 127.2, 127.0, 123.8, 121.7, 116.5, 51.8, 42.2, 36.4, 28.9, 21.4. **HRMS (ESI)** calcd for C<sub>26</sub>H<sub>30</sub>N<sub>3</sub>O<sub>2</sub> [M+H]<sup>+</sup>: 416.2333; found 416.2335.

**(3ca) (*E*)-*N*-(*tert*-butyl)-4-methoxy-2-(5-oxo-5-(quinolin-8-ylamino)pent-2-en-1-yl)benzamide**

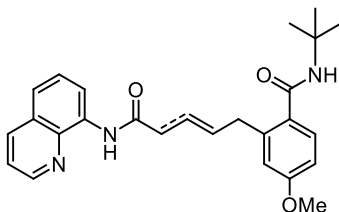

Colorless liquid, 31.1 mg, yield 72%. **<sup>1</sup>H NMR** (400 MHz, CDCl<sub>3</sub>) δ 9.95 (s, 1H), 9.83 (s, 0.19H), 8.84 – 8.79 (m, 0.38H), 8.76 – 8.73 (m, 1H), 8.71 (dd, *J* = 4.3, 1.3 Hz, 1H), 8.19 – 8.11 (m, 1.19H), 7.57 – 7.48 (m, 2.46H), 7.43 (dd, *J* = 8.2, 4.2 Hz, 1.19H), 7.34 (d, *J* = 8.4 Hz, 1H), 7.28 (d, *J* = 8.7 Hz, 0.20H), 7.06 (dd, *J* = 14.9, 7.4 Hz, 0.19H), 6.83 (d, *J* = 2.6 Hz, 1H), 6.77 – 6.69 (m, 1.20H), 6.18 (d, *J* = 15.2 Hz, 0.19H), 6.09 – 5.97 (m, 1H), 5.83 – 5.68 (m, 2H), 5.64 (s, 0.19H), 3.80 (s, 0.58H), 3.75 (d, *J* = 0.9 Hz, 3H), 3.66 (d, *J* = 6.4 Hz, 2H), 3.30 (d, *J* = 7.2 Hz, 2H), 3.01 (t, *J* = 7.7 Hz, 0.38H), 2.63 (q, *J* = 7.5 Hz, 0.38H), 1.46 (s, 1.71H), 1.36 (s, 9H). **<sup>13</sup>C NMR** (101 MHz, CDCl<sub>3</sub>) δ 169.7, 169.4, 160.6, 148.4, 148.3, 145.0, 139.7, 138.6, 136.5, 135.5, 134.5, 130.6, 128.9, 128.5, 128.0, 127.6, 127.5, 125.4, 124.1, 121.7, 121.7, 121.6, 116.8, 116.5, 116.1, 115.9, 111.4, 111.3, 55.4, 51.8, 42.2, 36.7, 34.1, 32.5, 29.0, 28.9. **HRMS (ESI)** calcd for C<sub>26</sub>H<sub>30</sub>N<sub>3</sub>O<sub>3</sub> [M+H]<sup>+</sup>: 430.2126; found 430.2129.

**(3da) (*E*)-*N*-(*tert*-butyl)-4-fluoro-2-(5-oxo-5-(quinolin-8-ylamino)pent-2-en-1-yl)benzamide**

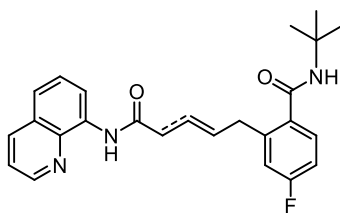

Colorless liquid, 23.1 mg, yield 55%.  $^1\text{H NMR}$  (400 MHz,  $\text{CDCl}_3$ )  $\delta$  9.91 (s, 1H), 8.74 (dd,  $J = 6.9, 2.2$  Hz, 1H), 8.69 (dd,  $J = 4.2, 1.7$  Hz, 1H), 8.15 (dd,  $J = 8.3, 1.7$  Hz, 1H), 7.55 – 7.49 (m, 2H), 7.45 (dd,  $J = 8.3, 4.2$  Hz, 1H), 7.30 (dd,  $J = 8.5, 5.4$  Hz, 1H), 7.08 (dd,  $J = 8.7, 2.8$  Hz, 1H), 7.01 (td,  $J = 8.3, 2.8$  Hz, 1H), 6.03 – 5.93 (m, 1H), 5.80 – 5.67 (m, 2H), 3.60 (d,  $J = 6.3$  Hz, 2H), 3.29 (dd,  $J = 7.2, 1.2$  Hz, 2H), 1.37 (s, 9H).  $^{13}\text{C NMR}$  (101 MHz,  $\text{CDCl}_3$ )  $\delta$  169.5, 168.2, 161.1 (d,  $J = 245$  Hz), 148.3, 139.4 (d,  $J = 6.0$  Hz), 138.5, 136.6, 135.4, 134.4, 133.0 (d,  $J = 4.0$  Hz), 132.3 (d,  $J = 8.0$  Hz), 128.1, 127.5, 124.2, 121.8 (d,  $J = 2.0$  Hz), 116.6 (d,  $J = 22$  Hz), 116.6, 114.2 (d,  $J = 22$  Hz), 52.1, 42.0, 35.6, 28.9, 28.8. **HRMS (ESI)** calcd for  $\text{C}_{25}\text{H}_{27}\text{FN}_3\text{O}_2$   $[\text{M}+\text{H}]^+$ : 420.2082; found 420.2079.

**(3ea) (*E*)-*N*-(*tert*-butyl)-4-chloro-2-(5-oxo-5-(quinolin-8-ylamino)pent-2-en-1-yl)benzamide**

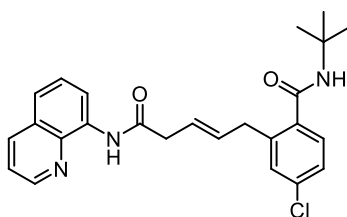

Colorless liquid, 18.3 mg, yield 42%.  $^1\text{H NMR}$  (400 MHz,  $\text{CDCl}_3$ )  $\delta$  9.92 (s, 1H), 8.75 (dd,  $J = 6.9, 2.1$  Hz, 1H), 8.71 (dd,  $J = 4.3, 1.7$  Hz, 1H), 8.15 (dd,  $J = 8.3, 1.7$  Hz, 1H), 7.57 – 7.46 (m, 2H), 7.44 (dd,  $J = 8.3, 4.2$  Hz, 1H), 7.34 – 7.27 (m, 2H), 7.21 (dd,  $J = 8.2, 2.1$  Hz, 1H), 5.99 (td,  $J = 15.2, 6.1$  Hz, 1H), 5.83 – 5.70 (m, 2H), 3.63 (d,  $J = 6.2$  Hz, 2H), 3.31 (d,  $J = 7.1$  Hz, 2H), 1.36 (s, 9H).  $^{13}\text{C NMR}$  (101 MHz,  $\text{CDCl}_3$ )  $\delta$  169.5, 168.6, 148.5, 139.6, 138.5, 136.5, 136.4, 135.6, 134.6, 134.4, 130.5, 128.6, 128.1, 127.5, 126.6, 124.7, 121.8, 121.7, 116.6, 52.1, 42.0, 36.2, 28.8. **HRMS (ESI)** calcd for  $\text{C}_{25}\text{H}_{27}\text{ClN}_3\text{O}_2$   $[\text{M}+\text{H}]^+$ : 436.1787; found 436.1792.



**(3fa) (E)-N-(tert-butyl)-3-(5-oxo-5-(quinolin-8-ylamino)pent-2-en-1-yl)-[1,1'-biphenyl]-4-carboxamide**

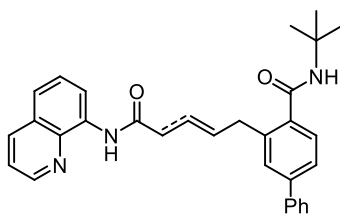

Colorless liquid, 22.9 mg, yield 48%.  $^1\text{H NMR}$  (400 MHz,  $\text{CDCl}_3$ )  $\delta$  9.97 (s, 1H), 8.76 (dd,  $J = 7.2, 1.9$  Hz, 1H), 8.66 (dd,  $J = 4.3, 1.7$  Hz, 1H), 8.14 (dd,  $J = 8.3, 1.7$  Hz, 1H), 7.60 – 7.56 (m, 3H), 7.54 – 7.50 (m, 3H), 7.47 – 7.34 (m, 5H), 6.06 (td,  $J = 15.4, 5.9$  Hz, 1H), 5.87 – 5.74 (m, 2H), 3.69 (d,  $J = 6.3$  Hz, 2H), 3.32 (d,  $J = 7.1$  Hz, 2H), 1.39 (s, 9H).  $^{13}\text{C NMR}$  (101 MHz,  $\text{CDCl}_3$ )  $\delta$  169.7, 169.6, 148.3, 139.5, 138.5, 136.5, 136.3, 135.5, 134.5, 131.1, 129.0, 128.4, 128.1, 127.7, 127.6, 127.2, 125.9, 124.2, 121.7, 116.6, 52.0, 42.1, 36.1, 28.9. **HRMS (ESI)** calcd for  $\text{C}_{31}\text{H}_{32}\text{N}_3\text{O}_2$   $[\text{M}+\text{H}]^+$ : 478.2490; found 478.2488.

**(3ga) (E)-N-(tert-butyl)-5-methyl-2-(5-oxo-5-(quinolin-8-ylamino)pent-2-en-1-yl)benzamide**

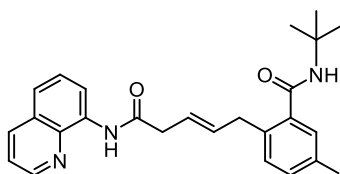

Colorless liquid, 31.0 mg, yield 72%.  $^1\text{H NMR}$  (400 MHz, Chloroform- $d$ )  $\delta$  10.02 (s, 1H), 9.89 (s, 0.14H), 8.93 – 8.84 (m, 0.28H), 8.82 (dd,  $J = 7.0, 2.0$  Hz, 1H), 8.76 (dd,  $J = 4.3, 1.6$  Hz, 1H), 8.22 (dd,  $J = 8.3, 1.7$  Hz, 1.16H), 7.63 – 7.52 (m, 2.29H), 7.51 (dd,  $J = 8.3, 4.2$  Hz, 1.15H), 7.34 – 7.28 (m, 1.15H), 7.22 – 7.18 (m, 1.15H), 6.24 (d,  $J = 8.4$  Hz, 0.27H), 6.09 (td,  $J = 15.1, 5.6$  Hz, 1H), 5.79 (q,  $J = 7.5$  Hz, 2H), 5.71 (s, 0.14H), 3.68 (d,  $J = 6.4$  Hz, 2H), 3.36 (d,  $J = 7.2$  Hz, 2H), 3.02 (t,  $J = 7.7$  Hz, 0.28H), 2.68 (q,  $J = 7.4$  Hz, 0.28H), 2.40 (s, 3.47H), 1.54 (s, 1.25H), 1.44 (s, 9H).  $^{13}\text{C NMR}$  (101 MHz,  $\text{CDCl}_3$ )  $\delta$  169.8, 169.7, 148.3, 145.2, 138.6, 137.9, 136.5, 136.1, 136.0, 134.5, 134.2, 130.5, 130.5, 128.1, 127.8, 127.6, 127.5, 125.3, 123.7, 121.7, 116.8, 116.5, 51.9, 42.1, 36.0, 34.2, 31.8, 29.0, 28.9, 21.0. **HRMS (ESI)** calcd for  $\text{C}_{26}\text{H}_{30}\text{N}_3\text{O}_2$   $[\text{M}+\text{H}]^+$ : 416.2333; found 416.2331.

**(3ha) (*E*)-*N*-(*tert*-butyl)-4,5-dimethyl-2-(5-oxo-5-(quinolin-8-ylamino)pent-2-en-1-yl)benzamide**

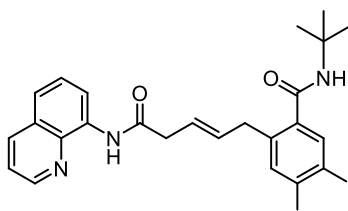

Colorless liquid, 28.0 mg, yield 65 %.  $^{13}\text{C NMR}$  (101 MHz,  $\text{CDCl}_3$ )  $\delta$  169.8, 148.3, 136.5, 136.1, 134.6, 134.6, 131.8, 128.5, 127.5, 123.6, 121.7, 77.5, 51.6, 42.2, 36.0, 28.9, 19.7, 19.3.  $^1\text{H NMR}$  (400 MHz, Chloroform-*d*)  $\delta$  9.95 (s, 1H), 8.75 (dd,  $J = 7.0, 1.9$  Hz, 1H), 8.69 (dd,  $J = 4.3, 1.7$  Hz, 1H), 8.16 (dd,  $J = 8.3, 1.7$  Hz, 1H), 7.56 – 7.48 (m, 2H), 7.44 (dd,  $J = 8.2, 4.2$  Hz, 1H), 7.14 (s, 1H), 7.05 (s, 1H), 6.02 (td,  $J = 15.4, 6.2$  Hz, 1H), 5.78 – 5.69 (m, 2H), 3.60 (d,  $J = 6.3$  Hz, 2H), 3.29 (d,  $J = 7.1$  Hz, 2H), 2.24 (s, 3H), 2.19 (s, 3H), 1.37 (s, 9H). **HRMS (ESI)** calcd for  $\text{C}_{27}\text{H}_{32}\text{N}_3\text{O}_2$   $[\text{M}+\text{H}]^+$ : 430.2489; found 430.2489.

**(3ia) (*E*)-*N*-(*tert*-butyl)-4,5-difluoro-2-(5-oxo-5-(quinolin-8-ylamino)pent-2-en-1-yl)benzamide**

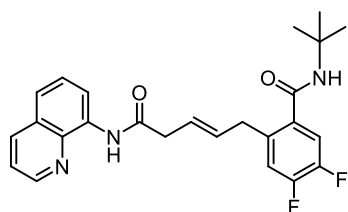

Colorless liquid, 23.7 mg, yield 55 %.  $^1\text{H NMR}$  (400 MHz, Chloroform-*d*)  $\delta$  9.90 (s, 1H), 9.82 (s, 0.08H), 8.88 – 8.60 (m, 2.17H), 8.16 (d,  $J = 8.2$  Hz, 1.08H), 7.51 (m, 2.15H), 7.45 (dd,  $J = 8.3, 4.3$  Hz, 1.08H), 7.18 (ddd,  $J = 21.2, 10.6, 7.7$  Hz, 2H), 7.09 – 6.94 (m, 0.18H), 6.16 (d,  $J = 15.2$  Hz, 1H), 5.95 (dt,  $J = 14.6, 6.3$  Hz, 1H), 5.75 (q,  $J = 9.1, 8.3$  Hz, 2.16H), 3.58 (d,  $J = 6.3$  Hz, 2H), 3.31 (d,  $J = 7.1$  Hz, 2H), 2.95 (t,  $J = 7.7$  Hz, 0.16H), 2.59 (q,  $J = 7.1$  Hz, 0.16H), 1.46 (s, 0.73H), 1.37 (s, 9H).  $^{13}\text{C NMR}$  (101 MHz, Chloroform-*d*)  $\delta$  169.4, 167.3, 151.1 (dd,  $J = 240\text{Hz}, 11$  Hz), 148.4 (dd,  $J = 245\text{Hz}, 11$  Hz), 148.4, 144.1, 138.5, 136.6, 134.9 (t,  $J = 4.0$  Hz), 134.4, 134.4 (t,  $J = 4.0$  Hz), 128.1, 127.5, 125.8, 124.9, 121.8, 119.3 (d,  $J = 18$  Hz), 119.2, 116.6, 116.5 (d,  $J = 22$  Hz), 52.2, 41.9, 35.7, 28.8, 28.8. **HRMS (ESI)** calcd for  $\text{C}_{25}\text{H}_{26}\text{F}_2\text{N}_3\text{O}_2$   $[\text{M}+\text{H}]^+$ : 438.1988; found 438.1979.

**(3ja) (*E*)-*N*-(*tert*-butyl)-2-(6-oxo-6-(quinolin-8-ylamino)hex-3-en-2-yl)benzamide**

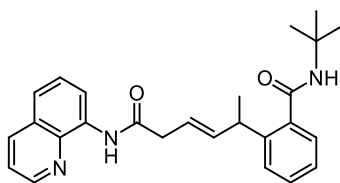

Colourless liquid, 31.6 mg, yield 76 %.  $^1\text{H NMR}$  (400 MHz, Chloroform-*d*)  $\delta$  10.01 (s, 1H), 8.79 – 8.72 (m, 1H), 8.66 (s, 1H), 8.15 (dd,  $J = 8.2, 2.4$  Hz, 1H), 7.57 – 7.30 (m, 6H), 7.22 (t,  $J = 7.8$  Hz, 1H), 6.06 (dd,  $J = 15.7, 6.6$  Hz, 1H), 5.81 – 5.69 (m, 2H), 4.11 (p,  $J = 7.2$  Hz, 1H), 3.29 (d,  $J = 7.3$  Hz, 2H), 1.51 (d,  $J = 5.9$  Hz, 3H), 1.38 (s, 9H).  $^{13}\text{C NMR}$  (101 MHz, Chloroform-*d*)  $\delta$  169.9, 169.7, 148.3, 142.7, 142.0, 138.6, 137.9, 136.5, 134.5, 129.8, 128.1, 127.5, 126.9, 126.2, 121.7, 121.6, 116.5, 52.0, 42.2, 38.4, 28.9, 21.6. **HRMS (ESI)** calcd for  $\text{C}_{26}\text{H}_{30}\text{N}_3\text{O}_2$   $[\text{M}+\text{H}]^+$ : 416.2333; found 416.2330.

**(3ka) (*E*)-*N*-(*tert*-butyl)-2-(8-oxo-8-(quinolin-8-ylamino)oct-5-en-4-yl)benzamide**

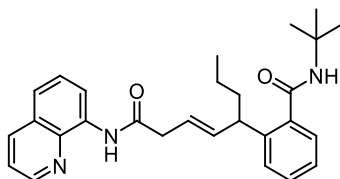

Colorless liquid, 32.3 mg, yield 73 %.  $^1\text{H NMR}$  (400 MHz, Chloroform-*d*)  $\delta$  9.95 (s, 1H), 8.76 (dd,  $J = 7.1, 1.9$  Hz, 1H), 8.58 (dd,  $J = 4.2, 1.7$  Hz, 1H), 8.14 (dd,  $J = 8.3, 1.7$  Hz, 1H), 7.56 – 7.45 (m, 2H), 7.47 – 7.38 (m, 2H), 7.35 (t,  $J = 7.4$  Hz, 2H), 7.22 (td,  $J = 7.3, 6.7, 1.4$  Hz, 1H), 6.01 (dd,  $J = 15.4, 7.8$  Hz, 1H), 5.81 – 5.68 (m, 2H), 3.91 (q,  $J = 7.6$  Hz, 1H), 3.31 – 3.25 (m, 1H), 1.83 (dtd,  $J = 9.9, 8.0, 7.3, 3.0$  Hz, 2H), 1.34 (s, 11H), 0.91 (t,  $J = 7.3$  Hz, 3H).  $^{13}\text{C NMR}$  (101 MHz, Chloroform-*d*)  $\delta$  169.9, 169.7, 148.2, 141.5, 141.4, 138.5, 138.5, 136.6, 134.4, 129.8, 128.1, 127.6, 127.5, 127.0, 126.1, 122.3, 121.7, 121.7, 116.6, 51.9, 44.5, 42.3, 38.3, 28.8, 20.9, 14.2. **HRMS (ESI)** calcd for  $\text{C}_{28}\text{H}_{33}\text{N}_3\text{O}_2\text{Na}$   $[\text{M}+\text{Na}]^+$ : 466.2465; found 466.2461.

**(3la) (E)-N-(tert-butyl)-2-(5-oxo-1-phenyl-5-(quinolin-8-ylamino)pent-2-en-1-yl)benzamide**

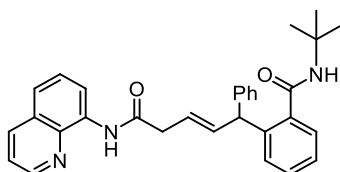

White solid, 35.8 mg, yield 75 %. m.p.: 128 – 131°C.  $^1\text{H NMR}$  (400 MHz, Chloroform-*d*)  $\delta$  10.02 (s, 1H), 8.76 (dd,  $J = 6.8, 2.2$  Hz, 1H), 8.67 (dd,  $J = 4.2, 1.7$  Hz, 1H), 8.16 (dd,  $J = 8.3, 1.6$  Hz, 1H), 7.57 – 7.46 (m, 2H), 7.44 (dd,  $J = 8.3, 4.2$  Hz, 1H), 7.38 (ddd,  $J = 6.9, 5.3, 1.4$  Hz, 2H), 7.35 – 7.22 (m, 6H), 7.24 – 7.15 (m, 1H), 6.32 (dd,  $J = 15.4, 6.6$  Hz, 1H), 5.63 (dtd,  $J = 15.0, 7.3, 1.5$  Hz, 1H), 5.55 – 5.46 (m, 2H), 3.37 (d,  $J = 7.3$  Hz, 2H), 1.27 (s, 9H).  $^{13}\text{C NMR}$  (101 MHz, Chloroform-*d*)  $\delta$  169.7, 169.5, 148.2, 143.0, 140.2, 139.2, 138.4, 136.5, 134.4, 129.7, 129.0, 128.6, 128.1, 127.5, 127.3, 126.6, 124.9, 121.7, 116.5, 51.8, 49.5, 42.2, 28.7. **HRMS (ESI)** calcd for  $\text{C}_{31}\text{H}_{32}\text{N}_3\text{O}_2$   $[\text{M}+\text{H}]^+$ : 478.2490; found 478.2488.

**(3ma) (E)-N-(tert-butyl)-2-(6-oxo-1-phenyl-6-(quinolin-8-ylamino)hex-3-en-2-yl)benzamide**

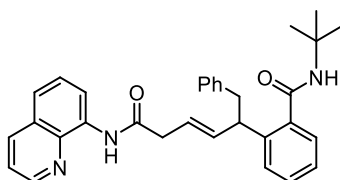

Colorless liquid, 29.5 mg, yield 60 %.  $^1\text{H NMR}$  (400 MHz, Chloroform-*d*)  $\delta$  10.00 (s, 1H), 8.76 (dt,  $J = 7.1, 1.6$  Hz, 1H), 8.68 (d,  $J = 3.9$  Hz, 1H), 8.15 (dt,  $J = 8.3, 1.5$  Hz, 1H), 7.56 – 7.47 (m, 3H), 7.43 (dd,  $J = 8.3, 4.2$  Hz, 1H), 7.35 (t,  $J = 7.5$  Hz, 1H), 7.27 – 7.07 (m, 5H), 7.03 (d,  $J = 7.3$  Hz, 2H), 6.10 (dd,  $J = 15.0, 6.8$  Hz, 1H), 5.73 (dt,  $J = 15.1, 7.3$  Hz, 1H), 5.22 (s, 1H), 4.20 (q,  $J = 7.4$  Hz, 1H), 3.35 – 3.07 (m, 4H), 1.29 (s, 9H).  $^{13}\text{C NMR}$  (101 MHz,  $\text{CDCl}_3$ )  $\delta$  169.7, 169.6, 148.2, 140.5, 140.1, 139.8, 138.7, 138.6, 136.5, 134.5, 129.6, 129.4, 128.3, 128.3, 128.2, 128.1, 127.5, 126.8, 126.3, 126.1, 123.0, 121.7, 116.5, 51.7, 46.3, 42.5, 42.2, 28.7. **HRMS (ESI)** calcd for  $\text{C}_{32}\text{H}_{34}\text{N}_3\text{O}_2$   $[\text{M}+\text{H}]^+$ : 492.2646; found 492.2651.

**(3na) (E)-2-(5-oxo-5-(quinolin-8-ylamino)pent-2-en-1-yl)-N-(tertpentyl)benzamide**

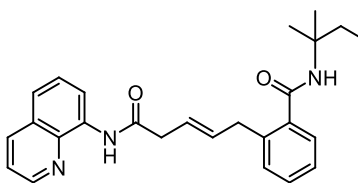

Colorless liquid, 29.5 mg, yield 68 %.  $^1\text{H NMR}$  (400 MHz, Chloroform-*d*)  $\delta$  9.96 (s, 1H), 9.83 (s, 0.17H), 8.82 (dd,  $J = 10.6, 5.8$  Hz, 0.34H), 8.75 (dd,  $J = 7.0, 1.9$  Hz, 1H), 8.70 (dd,  $J = 4.3, 1.6$  Hz, 1H), 8.15 (dd,  $J = 8.4, 1.7$  Hz, 1.17H), 7.56 – 7.48 (m, 2.37H), 7.44 (dd,  $J = 8.4, 4.3$  Hz, 1.16H), 7.39 – 7.31 (m, 3.48H), 7.27 – 7.20 (m, 1H), 7.05 (dd,  $J = 14.8, 7.4$  Hz, 0.18H), 6.18 (d,  $J = 15.3$  Hz, 0.17H), 6.04 (dt,  $J = 14.8, 6.4$  Hz, 1H), 5.76 (dt,  $J = 15.0, 7.2$  Hz, 1H), 5.60 (s, 1H), 5.55 (s, 0.17H), 3.67 (d,  $J = 6.4$  Hz, 2H), 3.30 (d,  $J = 7.2$  Hz, 2H), 3.01 (t,  $J = 7.7$  Hz, 0.33H), 2.64 (q,  $J = 7.5$  Hz, 0.33H), 1.86 (q,  $J = 7.6$  Hz, 0.37H), 1.77 (q,  $J = 7.5$  Hz, 2H), 1.41 (s, 0.98H), 1.32 (s, 6H), 0.93 (t,  $J = 7.4$  Hz, 0.58H), 0.85 (t,  $J = 7.5$  Hz, 3H).  $^{13}\text{C NMR}$  (101 MHz,  $\text{CDCl}_3$ )  $\delta$  169.7, 169.6, 148.3, 148.2, 145.0, 138.6, 138.0, 136.5, 135.7, 134.5, 130.6, 130.3, 129.8, 128.1, 127.6, 127.5, 127.1, 126.8, 126.4, 126.3, 125.4, 124.0, 121.7, 116.8, 116.5, 54.7, 42.2, 36.3, 34.2, 32.9, 32.2, 26.6, 26.5, 8.6. **HRMS (ESI)** calcd for  $\text{C}_{26}\text{H}_{30}\text{N}_3\text{O}_2$   $[\text{M}+\text{H}]^+$ : 416.2333; found 416.2337.

**(3ab) (E)-N-(tert-butyl)-2-(2-methyl-5-oxo-5-(quinolin-8-ylamino)pent-2-en-1-yl)benzamide**

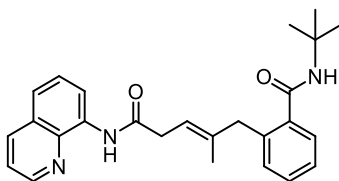

Colorless liquid, 33.3 mg, yield 80 %.  $^1\text{H NMR}$  (400 MHz, Chloroform-*d*)  $\delta$  10.00 (s, 1H), 8.75 (d,  $J = 6.8$  Hz, 1H), 8.69 (d,  $J = 3.6$  Hz, 1H), 8.16 (d,  $J = 8.3$  Hz, 1H), 7.55 – 7.48 (m, 2H), 7.45 (dd,  $J = 8.2, 4.2$  Hz, 1H), 7.40 (d,  $J = 7.4$  Hz, 1H), 7.37 – 7.29 (m, 2H), 7.27 – 7.23 (m, 1H), 5.83 (s, 1H), 5.42 (t,  $J = 7.7$  Hz, 1H), 3.67 (s, 2H), 3.32 (d,  $J = 7.6$  Hz, 2H), 1.83 (s, 3H), 1.34 (s, 9H).  $^{13}\text{C NMR}$  (101 MHz,  $\text{CDCl}_3$ )  $\delta$  169.7, 148.4, 142.0, 138.7, 138.6, 136.6, 136.4, 134.5, 131.2, 129.6, 128.1, 127.6, 127.5, 126.6, 121.7, 118.4, 116.6, 51.8, 42.6, 37.6, 28.8, 17.3. **HRMS (ESI)** calcd for  $\text{C}_{26}\text{H}_{30}\text{N}_3\text{O}_2$   $[\text{M}+\text{H}]^+$ : 416.2333; found 416.2330.

**(3ac) (E)-N-(tert-butyl)-2-(2-ethyl-5-oxo-5-(quinolin-8-ylamino)pent-2-en-1-yl)benzamide**

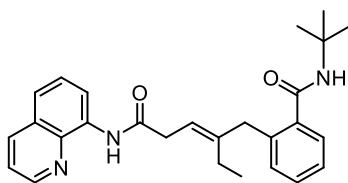

Colorless liquid, 32.2 mg, yield 75 %.  $^1\text{H NMR}$  (400 MHz, Chloroform-*d*)  $\delta$  10.06 (s, 0.23H), 9.96 (s, 1H), 8.81 – 8.68 (m, 2.43H), 8.13 (d,  $J = 8.3$  Hz, 1.22H), 7.53 – 7.46 (m, 2.45H), 7.43 (dd,  $J = 8.3, 4.2$  Hz, 1.24H), 7.39 – 7.34 (m, 2.45H), 7.30 – 7.19 (m, 2H), 7.12 (dt,  $J = 15.4, 7.3$  Hz, 0.47H), 5.79 (d,  $J = 15.2$  Hz, 1.27H), 5.69 (s, 0.23H), 5.27 (t,  $J = 7.7$  Hz, 1H), 3.72 (s, 0.45H), 3.67 (s, 2H), 3.37 (d,  $J = 7.6$  Hz, 0.46H), 3.30 (d,  $J = 7.6$  Hz, 2H), 2.21 (q,  $J = 7.6$  Hz, 2H), 2.10 (q,  $J = 7.5$  Hz, 0.43H), 1.41 (s, 2H), 1.32 (s, 9H), 1.19 – 1.10 (m, 0.81H), 1.08 (t,  $J = 7.6$  Hz, 3H).  $^{13}\text{C NMR}$  (101 MHz,  $\text{CDCl}_3$ )  $\delta$  170.0, 169.7, 169.6, 148.2, 147.4, 138.6, 138.5, 137.0, 136.4, 136.2, 134.4, 131.2, 129.6, 129.4, 129.3, 128.0, 127.9, 127.4, 127.3, 126.6, 126.4, 126.0, 121.6, 121.6, 121.4, 117.7, 116.4, 116.3, 51.7, 39.5, 37.6, 37.1, 33.0, 30.0, 28.8, 28.7, 24.3, 13.0. **HRMS (ESI)** calcd for  $\text{C}_{27}\text{H}_{32}\text{N}_3\text{O}_2$   $[\text{M}+\text{H}]^+$ : 430.2489; found 430.2486.

**(3ad) (E)-N-(tert-butyl)-2-(5-oxo-2-propyl-5-(quinolin-8-ylamino)pent-2-en-1-yl)benzamide**

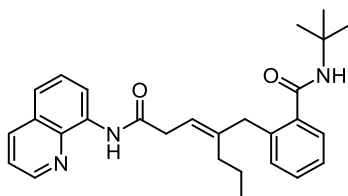

Colorless liquid, 28.8 mg, yield 65 %.  $^1\text{H NMR}$  (400 MHz, Chloroform-*d*)  $\delta$  9.95 (s, 1H), 8.73 (dd,  $J = 10.9, 5.4$  Hz, 2H), 8.16 (d,  $J = 8.2$  Hz, 1H), 7.55 – 7.48 (m, 2H), 7.45 (dd,  $J = 8.2, 4.1$  Hz, 1H), 7.41 – 7.35 (m, 2H), 7.30 (t,  $J = 7.4$  Hz, 1H), 7.25 (d,  $J = 7.0$  Hz, 1H), 5.83 (s, 1H), 5.33 (t,  $J = 7.6$  Hz, 1H), 3.67 (s, 2H), 3.33 (d,  $J = 7.6$  Hz, 2H), 2.18 (t,  $J = 7.6$  Hz, 2H), 1.54 (q,  $J = 7.6$  Hz, 2H), 1.33 (s, 9H), 0.95 (t,  $J = 7.3$  Hz, 3H).  $^{13}\text{C NMR}$  (101 MHz,  $\text{CDCl}_3$ )  $\delta$  169.9, 169.7, 148.3, 145.9, 138.8, 136.6, 136.5, 134.5, 131.3, 129.6, 128.1, 127.6, 127.5, 126.5, 121.7, 121.7, 118.6, 116.6, 51.8, 40.1, 37.4, 33.4, 28.8, 21.6, 14.4. **HRMS (ESI)** calcd for  $\text{C}_{28}\text{H}_{34}\text{N}_3\text{O}_2$   $[\text{M}+\text{H}]^+$ : 444.2646; found 444.2649.

**(3ae) (E)-N-(tert-butyl)-2-(4-methyl-5-oxo-5-(quinolin-8-ylamino)pent-2-en-1-yl)benzamide**

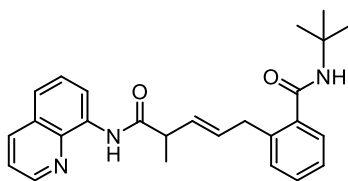

Colorless liquid, 29.9 mg, yield 72 %.  $^1\text{H NMR}$  (400 MHz, Chloroform-*d*)  $\delta$  10.02 (s, 1H), 8.76 (dd,  $J = 7.2$ , 1.8 Hz, 1H), 8.65 (dd,  $J = 4.3$ , 1.7 Hz, 1H), 8.15 (dd,  $J = 8.3$ , 1.7 Hz, 1H), 7.56 – 7.47 (m, 2H), 7.43 (dd,  $J = 8.3$ , 4.3 Hz, 1H), 7.37 – 7.28 (m, 3H), 7.23 (td,  $J = 7.3$ , 1.7 Hz, 1H), 6.03 (dt,  $J = 14.8$ , 6.4 Hz, 1H), 5.78 – 5.65 (m, 2H), 3.65 (d,  $J = 6.5$  Hz, 2H), 3.34 (p,  $J = 7.1$  Hz, 1H), 1.42 (d,  $J = 6.9$  Hz, 3H), 1.35 (s, 9H).  $^{13}\text{C NMR}$  (101 MHz,  $\text{CDCl}_3$ )  $\delta$  169.7, 148.3, 138.7, 138.0, 137.4, 136.5, 134.6, 132.9, 131.2, 130.5, 129.8, 128.1, 127.6, 127.1, 126.4, 121.7, 121.6, 116.5, 51.9, 46.1, 36.2, 28.9, 17.5. **HRMS (ESI)** calcd for  $\text{C}_{26}\text{H}_{30}\text{N}_3\text{O}_2$   $[\text{M}+\text{H}]^+$ : 416.2333; found 416.2338.

**(3af) (E)-N-(tert-butyl)-2-(1-oxo-1-(quinolin-8-ylamino)non-3-en-5-yl)benzamide**

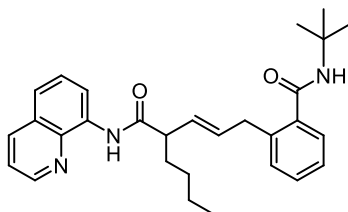

Colorless liquid, 29.7 mg, yield 65 %.  $^1\text{H NMR}$  (400 MHz, Chloroform-*d*)  $\delta$  9.95 (s, 1H), 8.77 (dd,  $J = 7.2$ , 1.8 Hz, 1H), 8.68 (dd,  $J = 4.3$ , 1.6 Hz, 1H), 8.15 (dd,  $J = 8.3$ , 1.6 Hz, 1H), 7.57 – 7.45 (m, 2H), 7.43 (dd,  $J = 8.3$ , 4.2 Hz, 1H), 7.37 – 7.26 (m, 3H), 7.26 – 7.17 (m, 1H), 5.99 (dt,  $J = 15.3$ , 6.5 Hz, 1H), 5.69 – 5.61 (m, 2H), 3.63 (d,  $J = 6.5$  Hz, 2H), 3.15 (q,  $J = 7.7$  Hz, 1H), 2.05 – 1.91 (m, 1H), 1.72 – 1.62 (m, 1H), 1.42 – 1.27 (m, 13H), 0.89 (t,  $J = 6.9$ , 4H).  $^{13}\text{C NMR}$  (101 MHz,  $\text{CDCl}_3$ )  $\delta$  172.6, 169.7, 148.3, 138.6, 137.9, 137.5, 136.5, 134.6, 133.3, 130.4, 130.3, 129.8, 128.1, 127.5, 127.1, 126.3, 121.7, 121.6, 116.5, 52.4, 51.9, 36.2, 32.0, 29.7, 28.8, 22.7, 14.1. **HRMS (ESI)** calcd for  $\text{C}_{29}\text{H}_{36}\text{N}_3\text{O}_2$   $[\text{M}+\text{H}]^+$ : 458.2803; found 458.2806.

**(3ag) (E)-2-(4-benzyl-5-oxo-5-(quinolin-8-ylamino)pent-2-en-1-yl)-N-(tert-butyl)benzamide**

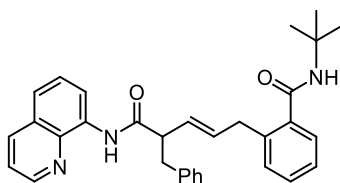

Colorless liquid, 27.1 mg, yield 55 %.  $^1\text{H NMR}$  (400 MHz, Chloroform-*d*)  $\delta$  9.98 (s, 1H), 8.83 (dd,  $J = 7.3$ , 1.7 Hz, 1H), 8.71 (dd,  $J = 4.3$ , 1.7 Hz, 1H), 8.19 (dd,  $J = 8.3$ , 1.7 Hz, 1H), 7.62 – 7.51 (m, 2H), 7.47 (dd,  $J = 8.3$ , 4.2 Hz, 1H), 7.37 (dd,  $J = 7.2$ , 1.7 Hz, 1H), 7.32 – 7.18 (m, 7H), 7.15 – 7.11 (m, 1H), 5.91 (dt,  $J = 15.3$ , 6.5 Hz, 1H), 5.74 (dd,  $J = 15.4$ , 8.7 Hz, 1H), 5.62 (s, 1H), 3.69 – 3.48 (m, 3H), 3.41 (dd,  $J = 13.6$ , 6.3 Hz, 1H), 3.00 (dd,  $J = 13.6$ , 8.1 Hz, 1H), 1.37 (s, 9H).  $^{13}\text{C NMR}$  (101 MHz,  $\text{CDCl}_3$ )  $\delta$  171.6, 169.6, 148.3, 139.4, 138.5, 137.8, 137.3, 136.5, 134.5, 134.1, 130.3, 129.7, 129.6, 129.5, 128.4, 128.0, 127.5, 126.9, 126.3, 126.3, 121.7, 116.6, 54.1, 51.9, 38.4, 36.0, 28.8. **HRMS (ESI)** calcd for  $\text{C}_{32}\text{H}_{34}\text{N}_3\text{O}_2$   $[\text{M}+\text{H}]^+$ : 492.2646; found 458.2648.

**(3ah) (E)-N-(tert-butyl)-2-(4-(4-methylbenzyl)-5-oxo-5-(quinolin-8-ylamino)pent-2-en-1-yl)benzamide**

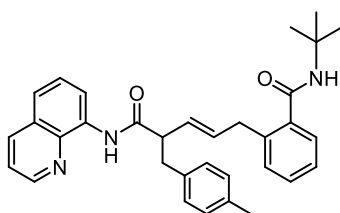

Colorless liquid, 21.5 mg, yield 45 %.  $^1\text{H NMR}$  (400 MHz, Chloroform-*d*)  $\delta$  9.92 (s, 1H), 8.77 (dd,  $J = 7.2$ , 1.3 Hz, 1H), 8.66 (dd,  $J = 4.1$ , 1.3 Hz, 1H), 8.14 (dd,  $J = 8.2$ , 1.3 Hz, 1H), 7.55 – 7.47 (m, 2H), 7.42 (dd,  $J = 8.3$ , 4.2 Hz, 1H), 7.33 – 7.30 (m, 1H), 7.25 – 7.18 (m, 2H), 7.12 – 7.07 (m, 3H), 7.02 (d,  $J = 7.9$  Hz, 2H), 5.85 (dt,  $J = 14.7$ , 6.5 Hz, 1H), 5.68 (dd,  $J = 15.4$ , 8.8 Hz, 1H), 5.56 (s, 1H), 3.56 (qd,  $J = 15.6$ , 6.5 Hz, 2H), 3.44 (q,  $J = 8.2$  Hz, 1H), 3.31 (dd,  $J = 13.6$ , 6.3 Hz, 1H), 2.91 (dd,  $J = 13.6$ , 8.1 Hz, 1H), 2.27 (s, 3H), 1.32 (s, 9H).  $^{13}\text{C NMR}$  (101 MHz,  $\text{CDCl}_3$ )  $\delta$  171.8, 169.6, 148.3, 138.6, 137.9, 137.3, 136.5, 136.2, 135.7, 134.5, 134.0, 130.3, 129.7, 129.3, 129.1, 128.0, 127.5, 126.9, 126.3, 121.7, 116.6, 54.2, 51.9, 38.0, 36.1, 28.8, 21.2. **HRMS (ESI)** calcd for  $\text{C}_{33}\text{H}_{36}\text{N}_3\text{O}_2$   $[\text{M}+\text{H}]^+$ : 506.2803; found 506.2801.



**(3aj) (E)-N-(tert-butyl)-2-(4,4-dimethyl-5-oxo-5-(quinolin-8-ylamino)pent-2-en-1-yl)benzamide**

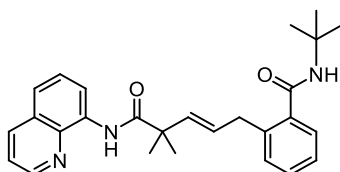

Colorless liquid, 32.2 mg, yield 75 %.  $^1\text{H NMR}$  (400 MHz, Chloroform-*d*)  $\delta$  10.21 (s, 1H), 8.76 (dd,  $J = 7.3$ , 1.6 Hz, 1H), 8.56 (dd,  $J = 4.2$ , 1.7 Hz, 1H), 8.13 (dd,  $J = 8.3$ , 1.7 Hz, 1H), 7.55 – 7.43 (m, 2H), 7.45 – 7.37 (m, 2H), 7.40 – 7.26 (m, 2H), 7.24 (t,  $J = 7.3$  Hz, 1H), 6.06 (dt,  $J = 15.5$ , 6.5 Hz, 1H), 5.87 (d,  $J = 15.7$  Hz, 1H), 5.72 (s, 1H), 3.71 (d,  $J = 6.5$  Hz, 2H), 1.45 (s, 6H), 1.34 (s, 9H).  $^{13}\text{C NMR}$  (101 MHz,  $\text{CDCl}_3$ )  $\delta$  175.3, 169.7, 148.3, 138.0, 137.5, 136.4, 136.1, 134.7, 130.4, 130.3, 129.8, 128.0, 127.5, 127.1, 126.3, 121.6, 121.5, 116.3, 51.9, 46.3, 36.3, 28.8, 25.6. **HRMS (ESI)** calcd for  $\text{C}_{27}\text{H}_{32}\text{N}_3\text{O}_2$   $[\text{M}+\text{H}]^+$ : 430.2489; found 430.2485.

**(4aa) 2,2'-(2-(3-oxo-3-(quinolin-8-ylamino)propylidene)propane-1,3-diyl)bis(N-(tert-butyl)benzamide)**

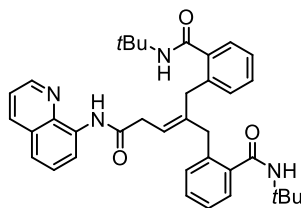

Colorless liquid, 41.8 mg, yield 71 %.  $^1\text{H NMR}$  (400 MHz, Chloroform-*d*)  $\delta$  10.00 (s, 1H), 8.80 – 8.73 (m, 1H), 8.18 – 8.07 (m, 1H), 7.56 – 7.48 (m, 2H), 7.43 (dd,  $J = 8.3$ , 4.2 Hz, 1H), 7.39 – 7.36 (m, 1H), 7.27 – 7.11 (m, 7H), 6.33 (s, 1H), 6.09 (s, 1H), 5.86 (t,  $J = 7.3$  Hz, 1H), 3.54 (s, 2H), 3.50 – 3.44 (m, 4H), 1.24 (s, 9H), 1.16 (s, 9H).  $^{13}\text{C NMR}$  (101 MHz,  $\text{CDCl}_3$ )  $\delta$  170.0, 169.9, 169.7, 148.4, 142.0, 136.5, 135.9, 135.3, 129.8, 129.5, 129.4, 128.5, 127.5, 127.1, 127.0, 126.4, 126.3, 122.2, 121.7, 116.6, 51.7, 51.7, 39.8, 37.7, 32.2, 28.7, 28.6. **HRMS (ESI)** calcd for  $\text{C}_{37}\text{H}_{43}\text{N}_4\text{O}_3$   $[\text{M}+\text{H}]^+$ : 591.3330; found 591.3336.

**(4ea) 2,2'-(2-(3-oxo-3-(quinolin-8-ylamino)propylidene)propane-1,3-diyl)bis(*N*-(*tert*-butyl)-4-chloro-benzamide)**

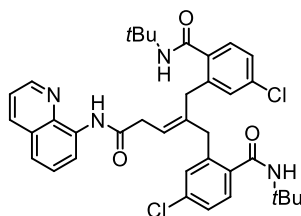

Colorless liquid, 42.8 mg, yield 65 %.  $^1\text{H NMR}$  (400 MHz, Chloroform-*d*)  $\delta$  9.99 (s, 1H), 8.73 (t,  $J = 5.7$  Hz, 2H), 8.14 (d,  $J = 8.3$  Hz, 1H), 7.54 – 7.35 (m, 4H), 7.30 – 7.10 (m, 7H), 6.20 (s, 1H), 5.95 (s, 1H), 5.84 (t,  $J = 7.4$  Hz, 1H), 3.57 (s, 2H), 3.48 (s, 2H), 3.45 (d,  $J = 7.5$  Hz, 2H), 1.62 (dq,  $J = 28.8, 7.4$  Hz, 4H), 1.18 (s, 6H), 1.11 (s, 6H), 0.75 (dt,  $J = 15.6, 7.4$  Hz, 6H).  $^{13}\text{C NMR}$  (101 MHz,  $\text{CDCl}_3$ )  $\delta$  170.0, 169.8, 169.7, 148.3, 142.0, 139.2, 139.1, 136.5, 135.9, 135.4, 134.5, 130.0, 129.5, 129.4, 128.5, 128.1, 127.5, 127.1, 126.9, 126.4, 126.2, 122.2, 121.7, 116.6, 54.5, 39.8, 37.7, 32.7, 32.7, 32.4, 26.3, 26.2, 8.6, 8.5. **HRMS (ESI)** calcd for  $\text{C}_{37}\text{H}_{41}\text{Cl}_2\text{N}_4\text{O}_3$   $[\text{M}+\text{H}]^+$ : 659.2551; found 659.2554.

**(4fa) 3,3''-(2-(3-oxo-3-(quinolin-8-ylamino)propylidene)propane-1,3-diyl)bis(*N*-(*tert*-butyl)-[1,1'-bi-phenyl]-4-carboxamide)**

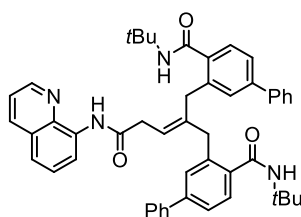

White solid, 33.4 mg, yield 45 %. m.p.: 138 – 140°C.  $^1\text{H NMR}$  (400 MHz, Chloroform-*d*)  $\delta$  10.01 (s, 1H), 8.83 – 8.62 (m, 2H), 8.16 (d,  $J = 8.2$  Hz, 1H), 7.61 – 7.37 (m, 3H), 7.29 (d,  $J = 1.7$  Hz, 1H), 7.23 – 7.09 (m, 5H), 6.44 (s, 1H), 6.10 (s, 1H), 5.98 (t,  $J = 7.4$  Hz, 1H), 3.69 – 3.32 (m, 6H), 1.27 (s, 9H), 1.21 (s, 9H).  $^{13}\text{C NMR}$  (101 MHz,  $\text{CDCl}_3$ )  $\delta$  169.3, 169.0, 168.8, 148.6, 139.9, 138.1, 137.5, 137.5, 137.4, 136.4, 135.4, 135.3, 134.4, 129.6, 128.5, 128.5, 128.4, 127.4, 126.7, 126.5, 123.8, 121.8, 121.8, 116.6, 77.5, 52.0, 39.7, 37.6, 32.1, 28.7, 28.6. **HRMS (ESI)** calcd for  $\text{C}_{49}\text{H}_{51}\text{N}_4\text{O}_3$   $[\text{M}+\text{H}]^+$ : 743.3956; found 743.3961.

**(4na) 2,2'-(2-(3-oxo-3-(quinolin-8-ylamino)propylidene)propane-1,3-diyl)bis(*N*-(*tert*-pentyl)benzamide)**

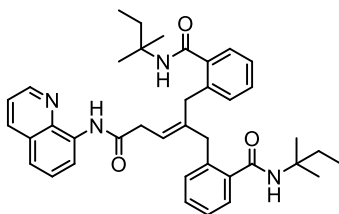

Colorless liquid, 52.7 mg, yield 76 %.  $^1\text{H NMR}$  (400 MHz, Chloroform-*d*)  $\delta$  10.04 (s, 1H), 8.79 (dd,  $J = 7.1, 1.9$  Hz, 1H), 8.61 (dd,  $J = 4.2, 1.7$  Hz, 1H), 8.13 (dd,  $J = 8.3, 1.7$  Hz, 1H), 7.55 – 7.47 (m, 2H), 7.40 (dd,  $J = 8.3, 4.2$  Hz, 1H), 7.33 – 7.24 (m, 5H), 7.21 – 7.15 (m, 1H), 6.73 (d,  $J = 8.8$  Hz, 1H), 5.64 (s, 1H), 3.78 (s, 3H), 3.21 (ddt,  $J = 15.2, 9.7, 5.4$  Hz, 2H), 3.02 – 2.93 (m, 1H), 2.90 – 2.74 (m, 2H), 2.11 – 1.92 (m, 2H), 1.41 (s, 9H).  $^{13}\text{C NMR}$  (101 MHz,  $\text{CDCl}_3$ )  $\delta$  169.9, 169.7, 159.3, 148.2, 139.4, 138.5, 138.0, 136.3, 134.7, 133.3, 130.5, 129.6, 128.0, 127.5, 126.8, 126.1, 121.7, 121.6, 116.7, 115.9, 113.8, 89.7, 55.4, 51.9, 36.7, 31.2, 29.5, 28.9. **HRMS (ESI)** calcd for  $\text{C}_{39}\text{H}_{47}\text{N}_4\text{O}_3$   $[\text{M}+\text{H}]^+$ : 619.3643; found 619.3640.

**(4ae) 2,2'-(2-(2-methyl-3-oxo-3-(quinolin-8-ylamino)propylidene)propane-1,3-diyl)bis(*N*-(*tert*-butyl)benzamide)**

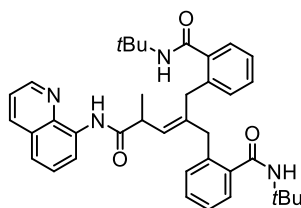

Colorless liquid, 45.3 mg, yield 75 %.  $^1\text{H NMR}$  (400 MHz, Chloroform-*d*)  $\delta$  10.11 (s, 1H), 8.80 (d,  $J = 6.6$  Hz, 1H), 8.74 – 8.69 (m, 1H), 8.19 (d,  $J = 8.2$  Hz, 1H), 7.60 – 7.51 (m, 2H), 7.47 (dd,  $J = 8.3, 4.2$  Hz, 1H), 7.43 – 7.39 (m, 1H), 7.32 – 7.11 (m, 7H), 6.59 (s, 1H), 5.98 (s, 1H), 5.85 (d,  $J = 9.7$  Hz, 1H), 3.77 – 3.66 (m, 1H), 3.59 (d,  $J = 3.4$  Hz, 2H), 3.47 (dd,  $J = 15.2, 9.4$  Hz, 2H), 1.52 (d,  $J = 6.9$  Hz, 3H), 1.26 (s, 9H), 1.17 (s, 9H).  $^{13}\text{C NMR}$  (101 MHz,  $\text{CDCl}_3$ )  $\delta$  173.1, 170.1, 169.8, 148.3, 139.8, 139.4, 139.1, 136.4, 135.8, 135.2, 134.7, 130.4, 129.5, 129.5, 129.4, 128.1, 128.1, 127.5, 127.1, 126.9, 126.3, 126.2, 121.7, 121.6, 116.5, 51.7, 51.7, 42.0, 39.6, 32.0, 28.7, 28.6, 18.7. **HRMS (ESI)** calcd for  $\text{C}_{38}\text{H}_{45}\text{N}_4\text{O}_3$   $[\text{M}+\text{H}]^+$ : 605.3487; found 605.3479.

**(4af) 2,2'-(2-(2-benzyl-3-oxo-3-(quinolin-8-ylamino)propylidene)propane-1,3-diyl)bis(*N*-(*tert*-butyl)benzamide)**

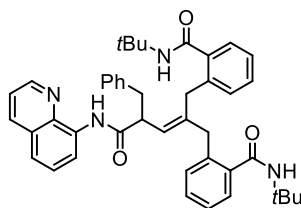

Colorless liquid, 44.2 mg, yield 65 %.  $^1\text{H NMR}$  (400 MHz, Chloroform-*d*)  $\delta$  10.07 (s, 1H), 8.80 (d,  $J = 7.2$  Hz, 1H), 8.62 (d,  $J = 4.2$  Hz, 1H), 8.15 (d,  $J = 8.3$  Hz, 1H), 7.59 – 7.49 (m, 2H), 7.42 (dd,  $J = 8.9, 4.1$  Hz, 1H), 7.32 – 7.01 (m, 11H), 6.87 (t,  $J = 7.6$  Hz, 1H), 6.64 (d,  $J = 7.7$  Hz, 1H), 6.39 (s, 1H), 6.03 (s, 1H), 5.83 (d,  $J = 9.9$  Hz, 1H), 3.85 (td,  $J = 9.5, 5.3$  Hz, 1H), 3.50 (dd,  $J = 13.4, 5.1$  Hz, 1H), 3.44 – 3.24 (m, 4H), 3.03 (dd,  $J = 13.2, 9.5$  Hz, 1H), 1.18 (s, 9H), 1.09 (s, 9H).  $^{13}\text{C NMR}$  (101 MHz,  $\text{CDCl}_3$ )  $\delta$  171.8, 170.0, 169.9, 148.4, 141.2, 139.3, 139.1, 139.0, 136.3, 135.6, 134.9, 134.5, 129.6, 129.4, 129.4, 129.3, 128.6, 128.2, 128.0, 127.4, 126.9, 126.7, 126.5, 126.2, 126.0, 121.8, 121.7, 116.6, 51.6, 50.0, 39.5, 39.3, 31.7, 28.6, 28.5. **HRMS (ESI)** calcd for  $\text{C}_{44}\text{H}_{49}\text{N}_4\text{O}_3$   $[\text{M}+\text{H}]^+$ : 681.3880; found 681.3883.

**(4ag) 2,2'-(2-(2-(4-methylbenzyl)-3-oxo-3-(quinolin-8-ylamino)propylidene)propane-1,3-diyl)bis(*N*-(*tert*-butyl)benzamide)**

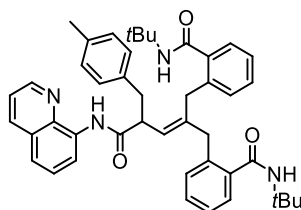

Colorless liquid, 49.9 mg, yield 72 %.  $^1\text{H NMR}$  (400 MHz, Chloroform-*d*)  $\delta$  10.05 (s, 1H), 8.80 (dd,  $J = 7.2, 1.7$  Hz, 1H), 8.63 (dd,  $J = 4.2, 1.6$  Hz, 1H), 8.15 (dd,  $J = 8.3, 1.6$  Hz, 1H), 7.60 – 7.47 (m, 2H), 7.42 (dd,  $J = 8.3, 4.2$  Hz, 1H), 7.24 – 7.10 (m, 5H), 7.06 (ddd,  $J = 14.0, 11.8, 7.5$  Hz, 5H), 6.87 (t,  $J = 7.6$  Hz, 1H), 6.68 (d,  $J = 7.8$  Hz, 1H), 6.37 (s, 1H), 6.03 (s, 1H), 5.81 (d,  $J = 10.0$  Hz, 1H), 3.83 (td,  $J = 9.6, 5.3$  Hz, 1H), 3.50 – 3.22 (m, 5H), 2.99 (dd,  $J = 13.5, 9.3$  Hz, 1H), 2.33 (s, 3H), 1.18 (s, 9H), 1.09 (s, 9H).  $^{13}\text{C NMR}$  (101 MHz,  $\text{CDCl}_3$ )  $\delta$  171.9, 170.0, 169.9, 148.4, 141.1, 139.1, 139.1, 138.6, 136.3, 136.1, 135.9, 135.6, 134.9, 134.6, 129.5, 129.4, 129.3, 129.3, 129.2, 128.7, 128.3, 128.0, 127.4, 127.0, 126.7, 126.2, 126.0, 121.7, 121.7,

116.6, 51.6, 50.1, 39.5, 38.9, 31.7, 28.6, 28.5, 21.2. **HRMS (ESI)** calcd for C<sub>45</sub>H<sub>51</sub>N<sub>4</sub>O<sub>3</sub> [M+H]<sup>+</sup>: 695.3956; found 695.3960.

**(4ai) 2,2'-(2-(2-(4-chlorobenzyl)-3-oxo-3-(quinolin-8-ylamino)propylidene) propane-1,3-diyl)bis(*N*-(*tert*-butyl)benzamide)**

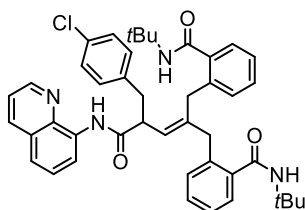

Colorless liquid, 39.3 mg, yield 55 %. **<sup>1</sup>H NMR** (400 MHz, Chloroform-*d*) δ 10.04 (s, 1H), 8.77 (dd, *J* = 6.9, 2.0 Hz, 1H), 8.61 (dd, *J* = 4.3, 1.6 Hz, 1H), 8.15 (dd, *J* = 8.3, 1.7 Hz, 1H), 7.60 – 7.49 (m, 2H), 7.42 (dd, *J* = 8.3, 4.1 Hz, 1H), 7.28 – 7.00 (m, 10H), 6.93 (t, *J* = 7.5 Hz, 1H), 6.63 (d, *J* = 7.8 Hz, 1H), 6.42 (s, 1H), 5.94 (s, 1H), 5.79 (d, *J* = 10.0 Hz, 1H), 3.81 (td, *J* = 9.5, 5.5 Hz, 1H), 3.50 – 3.24 (m, 5H), 2.99 (dd, *J* = 13.5, 9.1 Hz, 1H), 1.19 (s, 9H), 1.10 (s, 9H). **<sup>13</sup>C NMR** (101 MHz, CDCl<sub>3</sub>) δ 171.4, 170.0, 169.8, 148.4, 141.5, 139.2, 139.0, 138.6, 137.9, 136.3, 135.5, 134.8, 134.4, 132.4, 131.0, 129.3, 128.8, 128.3, 128.0, 128.0, 127.4, 127.0, 126.8, 126.3, 126.1, 121.9, 121.7, 116.6, 51.6, 49.8, 39.5, 38.5, 31.8, 28.6, 28.5. **HRMS (ESI)** calcd for C<sub>44</sub>H<sub>48</sub>ClN<sub>4</sub>O<sub>3</sub> [M+H]<sup>+</sup>: 715.3410; found 715.3415.

**(4af) 2,2'-(2-(2-(quinolin-8-ylcarbamoyl)hexylidene)propane-1,3-diyl)bis(*N*-(*tert*-butyl)benzamide)**

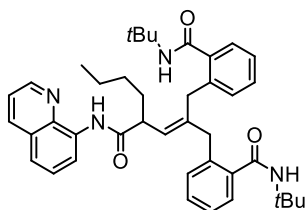

Colorless liquid, 48.4 mg, yield 75 %. **<sup>1</sup>H NMR** (400 MHz, Chloroform-*d*) δ 9.99 (s, 1H), 8.78 (d, *J* = 7.1 Hz, 1H), 8.68 (d, *J* = 4.3 Hz, 1H), 8.15 (d, *J* = 8.2 Hz, 1H), 7.57 – 7.49 (m, 2H), 7.43 (dd, *J* = 8.3, 4.2 Hz, 1H), 7.36 – 7.31 (m, 1H), 7.22 (ddd, *J* = 26.9, 9.1, 4.6 Hz, 5H), 7.11 – 6.99 (m, 2H), 6.64 (s, 1H), 5.90 (s, 1H), 5.81 (d, *J* = 9.7 Hz, 1H), 3.63 – 3.36 (m, 5H), 1.75 (d, *J* = 13.0 Hz, 2H), 1.51 – 1.34 (m, 4H), 1.23 (s, 9H), 1.13 (s, 9H), 0.91 (t, *J* = 6.9 Hz, 3H). **<sup>13</sup>C NMR** (101 MHz, CDCl<sub>3</sub>) δ 172.8, 170.2, 169.8, 148.4, 140.0, 139.3, 136.3, 135.9,

135.2, 134.6, 129.8, 129.4, 129.4, 129.3, 128.1, 128.0, 127.4, 127.1, 126.8, 126.3, 126.1, 121.7, 121.6, 116.6, 51.7, 51.6, 48.1, 39.7, 33.4, 32.0, 29.8, 28.7, 28.5, 22.9, 14.2. **HRMS (ESI)** calcd for  $C_{41}H_{51}N_4O_3$   $[M+H]^+$ : 647.3956; found 647.3959.

**(5) (E)-2-(5-oxo-5-(quinolin-8-ylamino)pent-2-en-1-yl)benzamide**

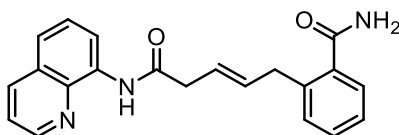

Colorless liquid, 27.3 mg, yield 79 %.  **$^1H$  NMR** (400 MHz, Chloroform-*d*)  $\delta$  9.89 (s, 1H), 8.78 – 8.69 (m, 2H), 8.16 (dd,  $J$  = 8.3, 1.7 Hz, 1H), 7.55 – 7.47 (m, 6H), 7.45 (dd,  $J$  = 8.3, 4.2 Hz, 1H), 7.39 – 7.35 (m, 2H), 7.30 – 7.23 (m, 2H), 6.19 (s, 1H), 6.01 (dt,  $J$  = 14.0, 6.1 Hz, 1H), 5.80 (s, 1H), 5.69 (dt,  $J$  = 15.0, 7.2 Hz, 1H), 3.70 (d,  $J$  = 6.2 Hz, 2H), 3.31 (d,  $J$  = 7.2 Hz, 2H).  **$^{13}C$  NMR** (101 MHz,  $CDCl_3$ )  $\delta$  172.05, 169.86, 148.38, 138.54, 136.58, 135.87, 135.63, 134.41, 130.88, 130.53, 128.11, 127.60, 127.54, 126.62, 124.14, 121.81, 121.76, 116.67, 77.48, 77.16, 76.84, 41.90, 36.60. **HRMS (ESI)** calcd for  $C_{21}H_{20}N_3O_2$   $[M+H]^+$ : 346.1551; found 346.1554.

**(6) methyl(2E,4E)-5-(2-(tert-butylcarbamoyl)phenyl)penta-2,4-dienoate**

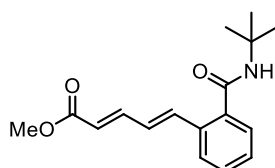

White solid, M.P: 119 - 121 °C, 15.8 mg, yield 55%.  **$^1H$  NMR** (400 MHz, Chloroform-*d*)  $\delta$  7.60 (d,  $J$  = 7.7 Hz, 1H), 7.47 – 7.36 (m, 3H), 7.31 (td,  $J$  = 7.3, 1.2 Hz, 1H), 7.22 (d,  $J$  = 15.6 Hz, 1H), 6.84 (dd,  $J$  = 15.5, 11.1 Hz, 1H), 6.00 (d,  $J$  = 15.3 Hz, 1H), 5.60 (s, 1H), 3.77 (s, 3H), 1.47 (s, 9H).  **$^{13}C$  NMR** (101 MHz,  $CDCl_3$ )  $\delta$  168.8, 167.5, 144.8, 137.7, 137.6, 133.9, 129.9, 128.8, 128.5, 127.5, 126.5, 121.7, 52.3, 51.8, 29.0. **HRMS (ESI)** calcd for  $C_{17}H_{22}NO_3$   $[M+H]^+$ : 288.1595; found 288.1594.

**(7) *N*-(*tert*-butyl)-2-(2,3-dihydroxy-5-oxo-5-(quinolin-8-ylamino)pentyl)benzamide**

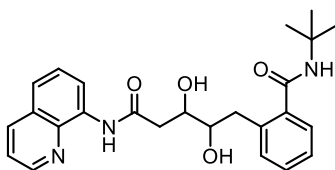

White solid, M.P: 146 - 148 °C, yield 88 %.  $^1\text{H NMR}$  (400 MHz, Chloroform-*d*)  $\delta$  10.41 (s, 1H), 8.87 – 8.84 (m, 1H), 8.79 (dd,  $J = 7.0, 2.0$  Hz, 1H), 8.19 – 8.10 (m, 1H), 7.57 – 7.50 (m, 2H), 7.45 (dd,  $J = 8.2, 4.2$  Hz, 1H), 7.41 – 7.33 (m, 3H), 7.25 (t,  $J = 7.4$  Hz, 1H), 6.01 (s, 1H), 5.20 – 5.07 (m, 1H), 4.41 (s, 1H), 4.10 (d,  $J = 9.0$  Hz, 1H), 3.84 – 3.76 (m, 1H), 3.10 – 2.97 (m, 2H), 2.97 – 2.89 (m, 1H), 2.82 – 2.77 (m, 1H), 1.48 (d,  $J = 1.7$  Hz, 9H).  $^{13}\text{C NMR}$  (101 MHz,  $\text{CDCl}_3$ )  $\delta$  170.8, 148.5, 138.7, 137.4, 137.2, 136.3, 134.8, 131.2, 130.7, 128.1, 127.4, 126.9, 126.7, 121.7, 121.7, 116.9, 75.5, 70.9, 52.5, 42.0, 36.9, 28.8. **HRMS (ESI)** calcd for  $\text{C}_{25}\text{H}_{30}\text{N}_3\text{O}_4$   $[\text{M}+\text{H}]^+$  : 436.2331; found 436.2330.

**(8) 2-(2-(benzylamino)-5-oxo-5-(quinolin-8-ylamino)pentyl)-*N*-(*tert*-butyl) benzamide**

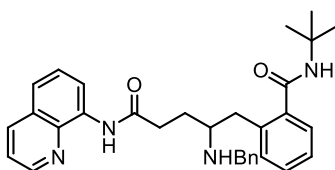

Colorless liquid, 38.1 mg, yield 75%.  $^1\text{H NMR}$  (400 MHz, Chloroform-*d*)  $\delta$  11.09 (s, 1H), 8.80 (dd,  $J = 7.3, 1.7$  Hz, 1H), 8.66 (dd,  $J = 4.3, 1.7$  Hz, 1H), 8.25 – 8.03 (m, 1H), 7.55 – 7.45 (m, 4H), 7.40 (dd,  $J = 8.3, 4.2$  Hz, 1H), 7.27 (ddd,  $J = 10.8, 5.2, 3.0$  Hz, 5H), 7.20 – 7.13 (m, 2H), 5.70 (s, 1H), 4.01 – 3.86 (m, 2H), 3.21 (dt,  $J = 6.9, 3.2$  Hz, 1H), 2.98 – 2.83 (m, 2H), 2.83 – 2.58 (m, 2H), 2.05 – 1.88 (m, 3H), 1.39 (s, 9H).  $^{13}\text{C NMR}$  (101 MHz,  $\text{CDCl}_3$ )  $\delta$  171.0, 169.8, 148.3, 139.9, 139.0, 137.7, 136.2, 135.3, 130.3, 129.7, 128.5, 128.4, 128.1, 127.4, 127.0, 126.8, 126.1, 121.5, 117.1, 55.0, 51.8, 51.2, 42.2, 36.1, 29.8, 28.9. **HRMS (ESI)** calcd for  $\text{C}_{32}\text{H}_{37}\text{N}_4\text{O}_2$   $[\text{M}+\text{H}]^+$ : 509.2912; found 509.2916.

**(9) *N*-(*tert*-butyl)-2-(5-oxo-2-phenyl-5-(quinolin-8-ylamino)pentyl)benzamide**

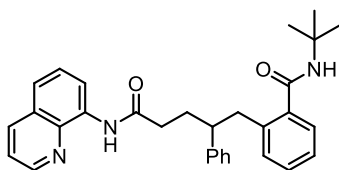

White solid, M.P: 133 - 136 °C, 26.4 mg, yield 85%. **<sup>1</sup>H NMR** (400 MHz, Chloroform-*d*) δ 9.61 (s, 1H), 8.75 (dd, *J* = 4.2, 1.7 Hz, 1H), 8.72 (dd, *J* = 7.2, 1.9 Hz, 1H), 8.14 (dd, *J* = 8.3, 1.7 Hz, 1H), 7.56 – 7.46 (m, 2H), 7.43 (dd, *J* = 8.2, 4.2 Hz, 1H), 7.30 – 7.23 (m, 4H), 7.18 (dt, *J* = 7.7, 1.6 Hz, 3H), 7.12 (td, *J* = 7.4, 1.3 Hz, 1H), 7.04 (d, *J* = 7.5 Hz, 1H), 5.57 (s, 1H), 3.19 – 3.10 (m, 2H), 3.09 – 3.02 (m, 1H), 2.36 (pt, *J* = 9.0, 5.1 Hz, 2H), 2.28 – 2.17 (m, 1H), 2.10 (ddt, *J* = 13.6, 9.4, 4.8 Hz, 1H), 1.44 (s, 9H). **<sup>13</sup>C NMR** (101 MHz, CDCl<sub>3</sub>) δ 171.7, 170.1, 148.2, 144.2, 138.4, 138.3, 138.2, 136.4, 134.7, 131.2, 129.3, 128.6, 128.1, 128.0, 127.5, 126.8, 126.5, 126.1, 121.7, 121.4, 116.5, 51.9, 46.9, 41.0, 36.2, 31.0, 28.9. **HRMS (ESI)** calcd for C<sub>31</sub>H<sub>34</sub>N<sub>3</sub>O<sub>2</sub> [M+H]<sup>+</sup>: 480.2646; found 480.2646.



## IV. NMR spectra of synthesized compounds

### (3aa) *(E)*-*N*-(*tert*-butyl)-2-(5-(naphthalen-1-ylamino)-5-oxopent-2-en-1-yl) benzamide

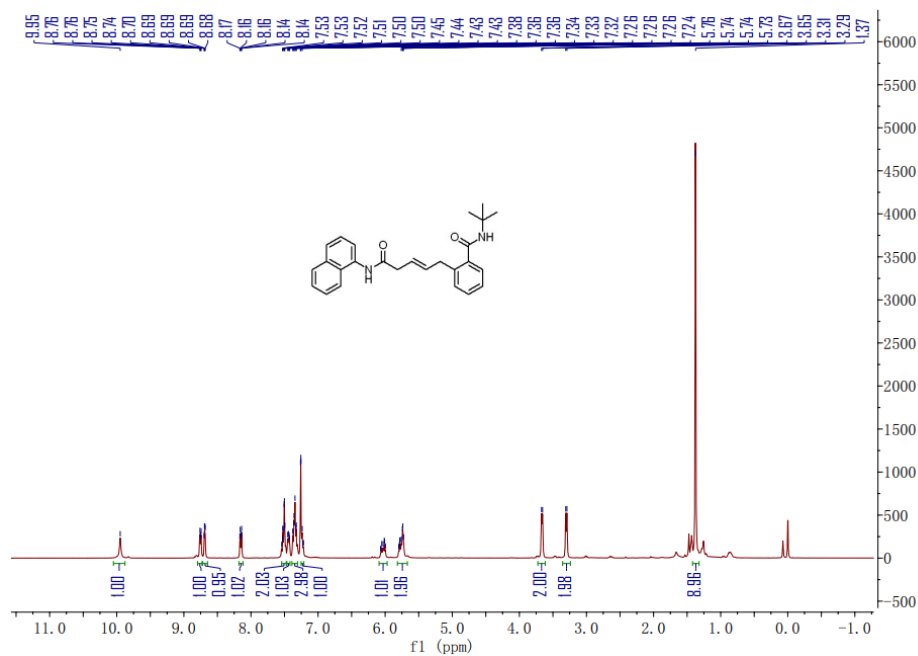

Figure S1. <sup>1</sup>H NMR (400 MHz, CDCl<sub>3</sub>) spectra of compound 3aa

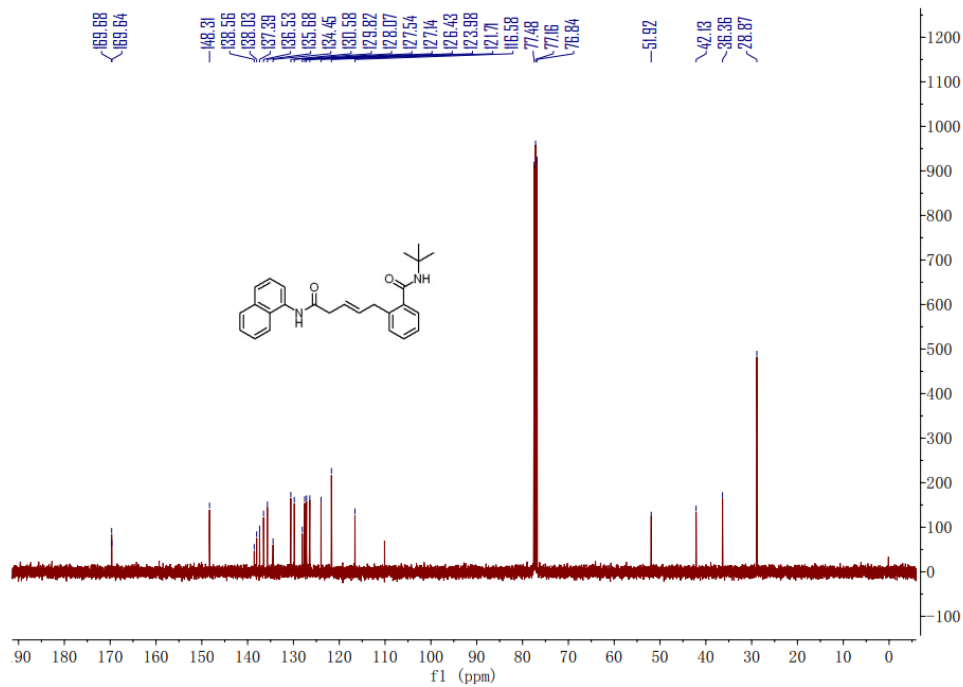

Figure S2. <sup>13</sup>C NMR (101 MHz, CDCl<sub>3</sub>) spectra of compound 3aa

**(3ba) (*E*)-*N*-(*tert*-butyl)-4-methyl-2-(5-oxo-5-(quinolin-8-ylamino)pent-2-en-1-yl)benzamide**

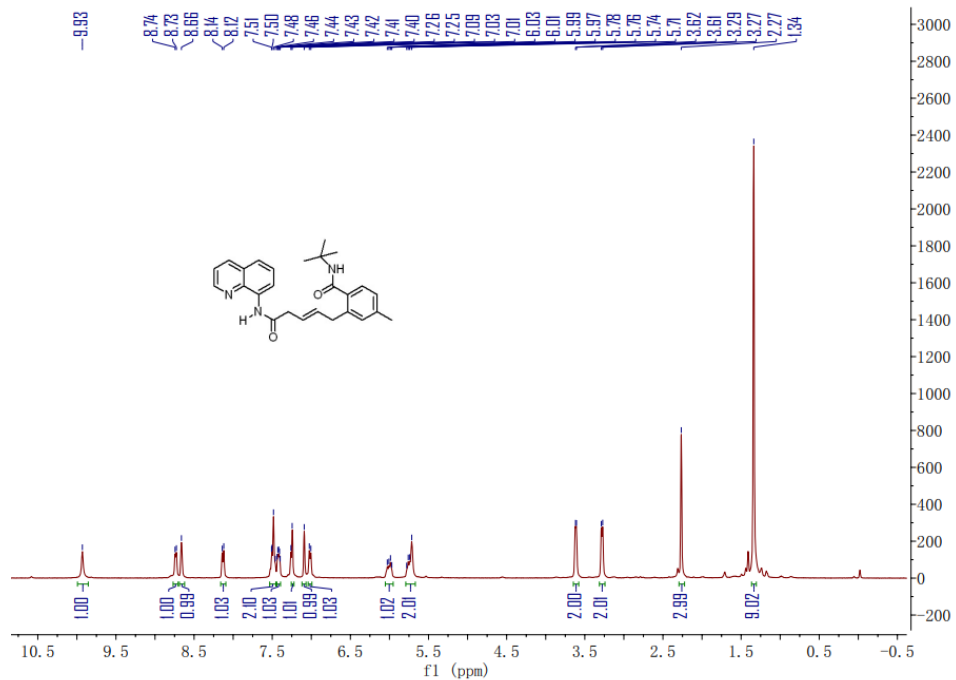

**Figure S3.**  $^1\text{H}$  NMR (400 MHz,  $\text{CDCl}_3$ ) spectra of compound **3ba**

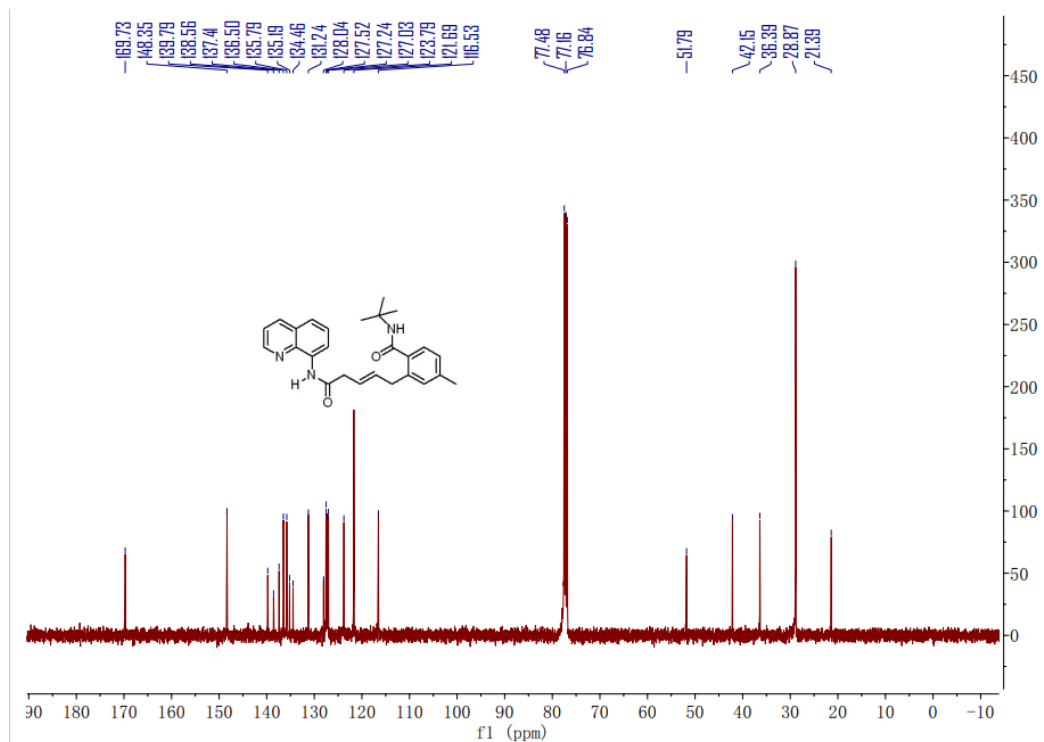

**Figure S4.**  $^{13}\text{C}$  NMR (101 MHz,  $\text{CDCl}_3$ ) spectra of compound **3ba**

**(3ca) (E)-N-(tert-butyl)-4-methoxy-2-(5-oxo-5-(quinolin-8-ylamino)pent-2-en-1-yl)benzamide**

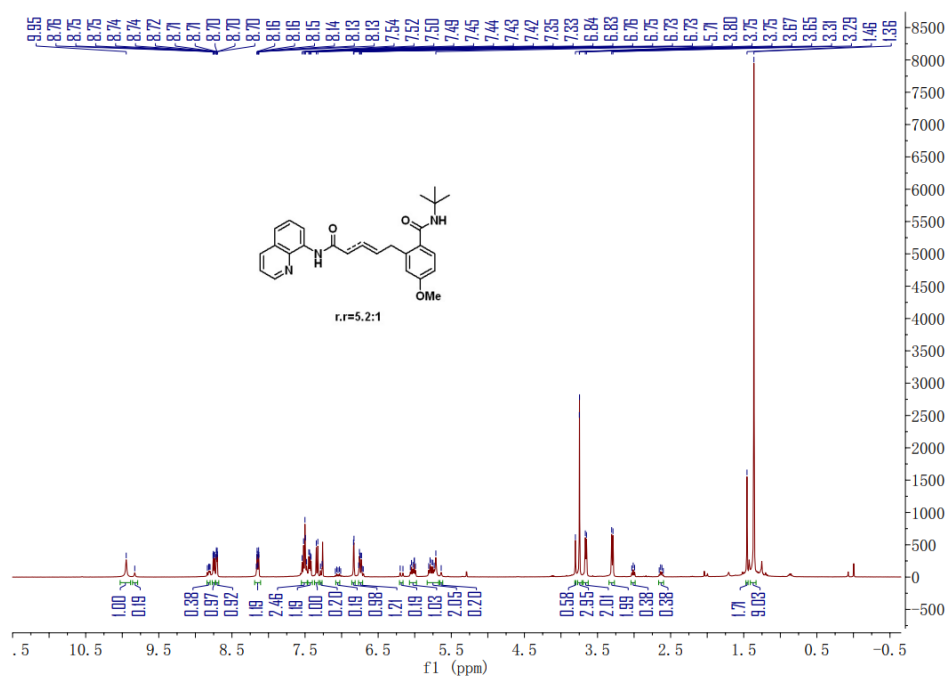

**Figure S5.**  $^1\text{H}$  NMR (400 MHz,  $\text{CDCl}_3$ ) spectra of compound 3ca

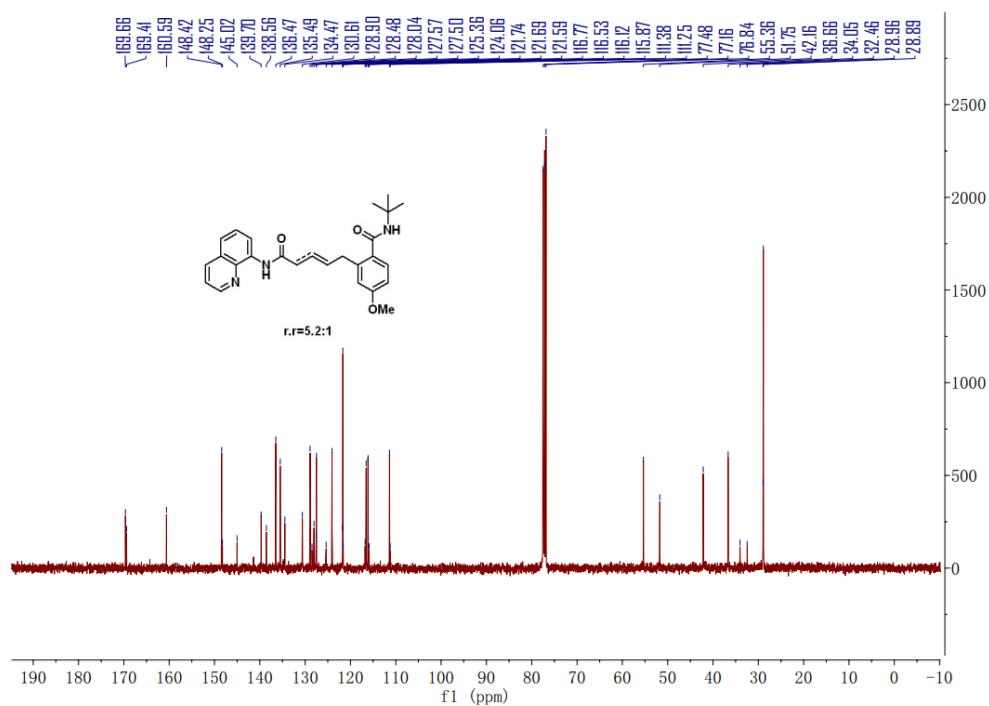

**Figure S6.**  $^{13}\text{C}$  NMR (101 MHz,  $\text{CDCl}_3$ ) spectra of compound 3ca

**(3da) (E)-N-(tert-butyl)-4-fluoro-2-(5-oxo-5-(quinolin-8-ylamino)pent-2-en-1-yl)benzamide**

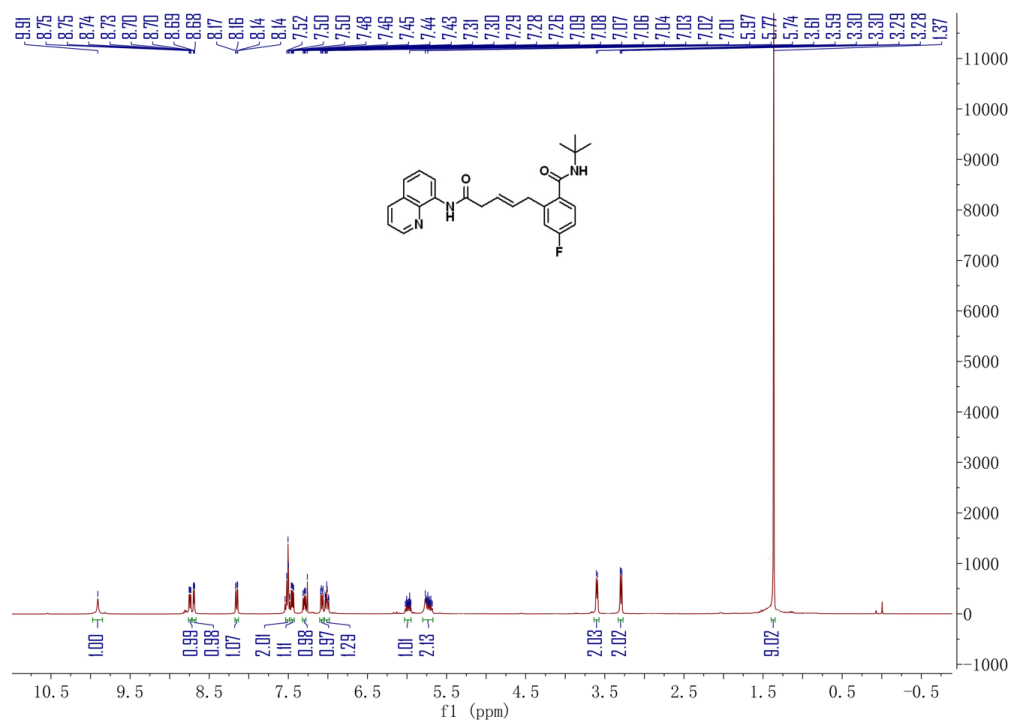

**Figure S7.**  $^1\text{H}$  NMR (400 MHz,  $\text{CDCl}_3$ ) spectra of compound **3da**

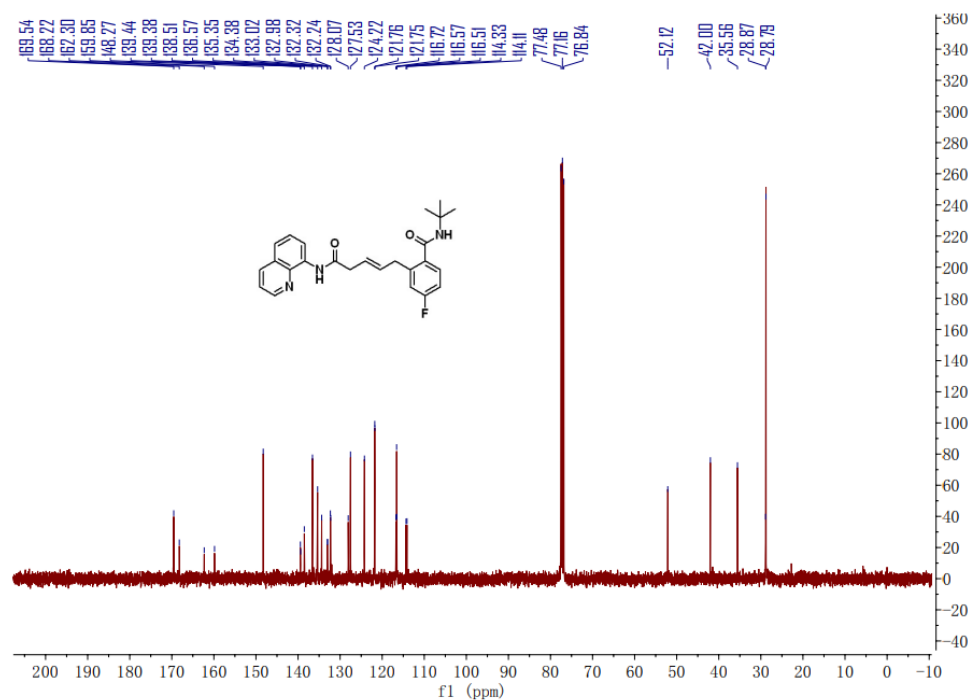

**Figure S8.**  $^{13}\text{C}$  NMR (101 MHz,  $\text{CDCl}_3$ ) spectra of compound **3da**

**(3ea) (E)-N-(tert-butyl)-4-chloro-2-(5-oxo-5-(quinolin-8-ylamino)pent-2-en-1-yl)benzamide**

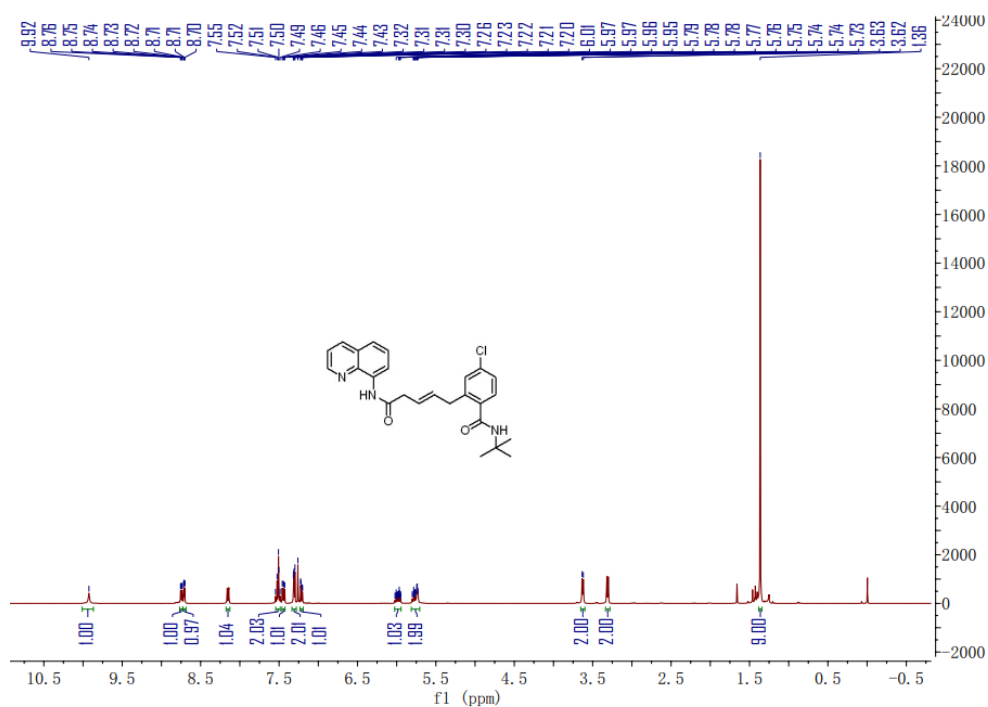

**Figure S9.** <sup>1</sup>H NMR (400 MHz, Chloroform-*d*) spectra of compound **3ea**

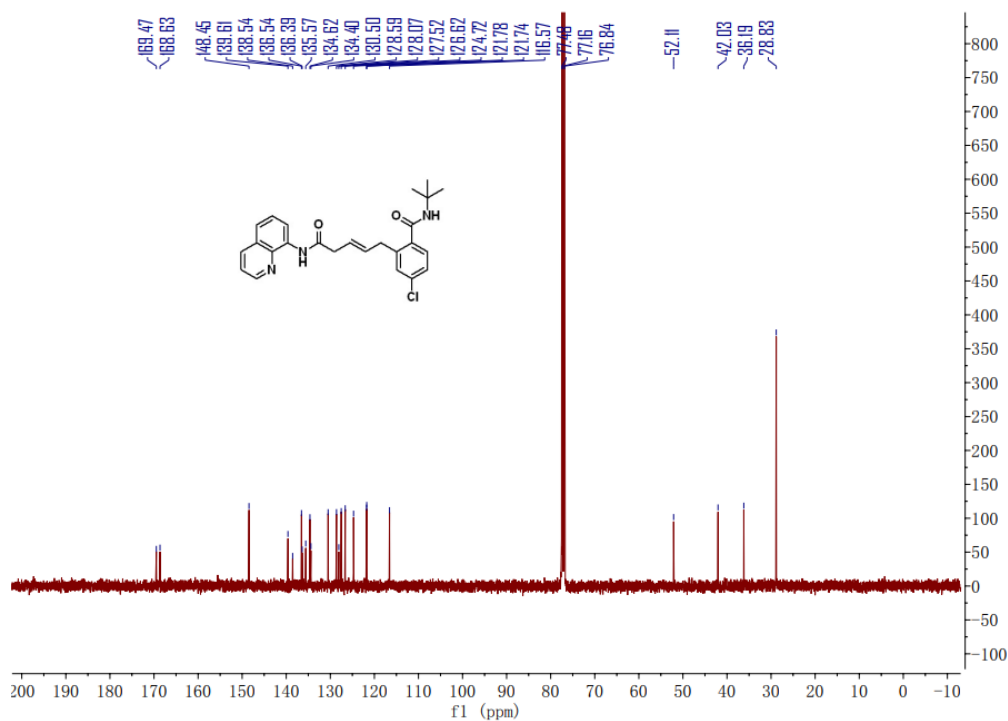

**Figure S10.** <sup>13</sup>C NMR (101 MHz, Chloroform-*d*) spectra of compound **3ea**

**(3fa) (E)-N-(tert-butyl)-3-(5-oxo-5-(quinolin-8-ylamino)pent-2-en-1-yl)-[1,1'-biphenyl]-4-carboxamide**

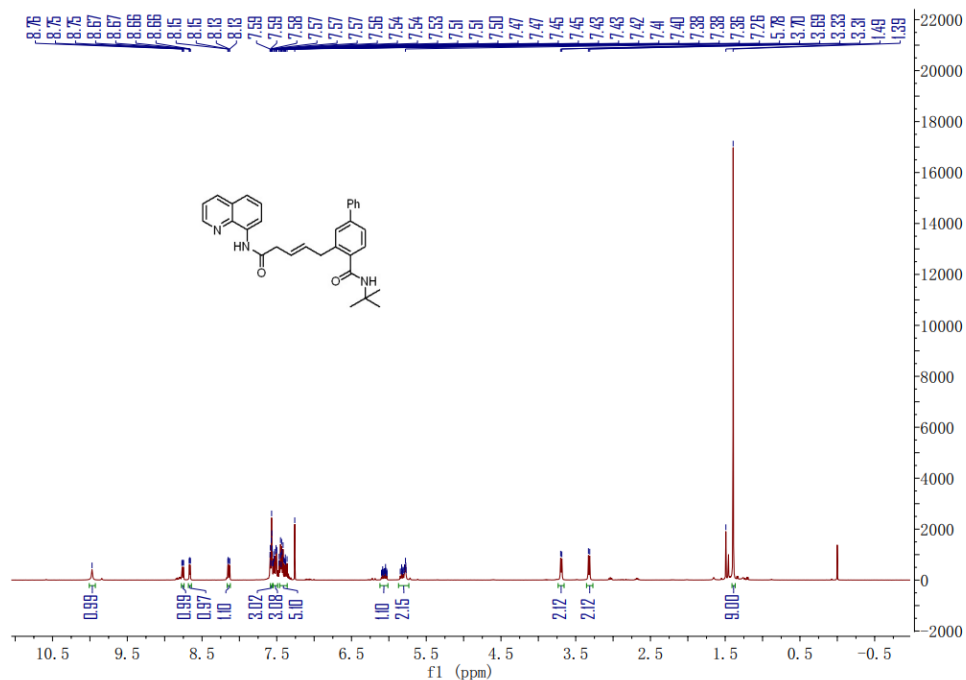

**Figure S11.** <sup>1</sup>H NMR (400 MHz, Chloroform-*d*) spectra of compound **3fa**

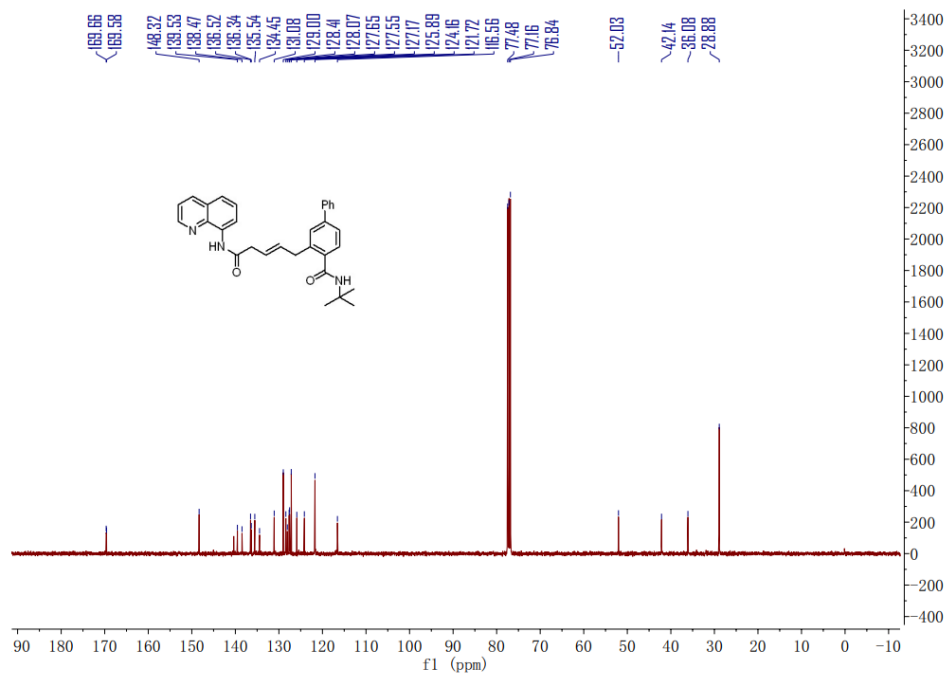

**Figure S12.** <sup>13</sup>C NMR (101 MHz, Chloroform-*d*) spectra of compound **3fa**

**(3ga) (E)-N-(tert-butyl)-5-methyl-2-(5-oxo-5-(quinolin-8-ylamino)pent-2-en-1-yl)benzamide**

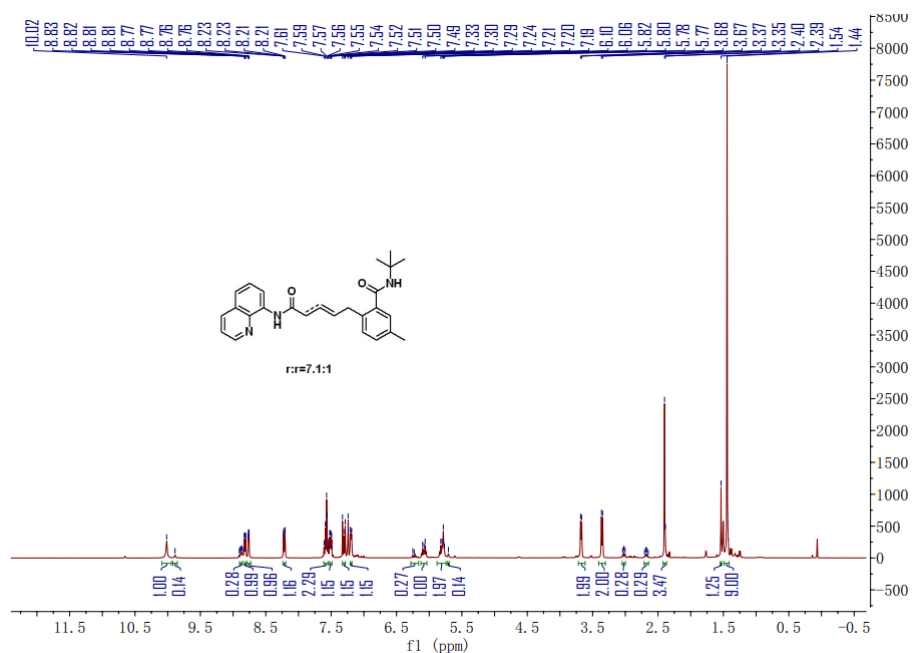

**Figure S13.**  $^1\text{H}$  NMR (400 MHz, Chloroform-*d*) spectra of compound **3ga**

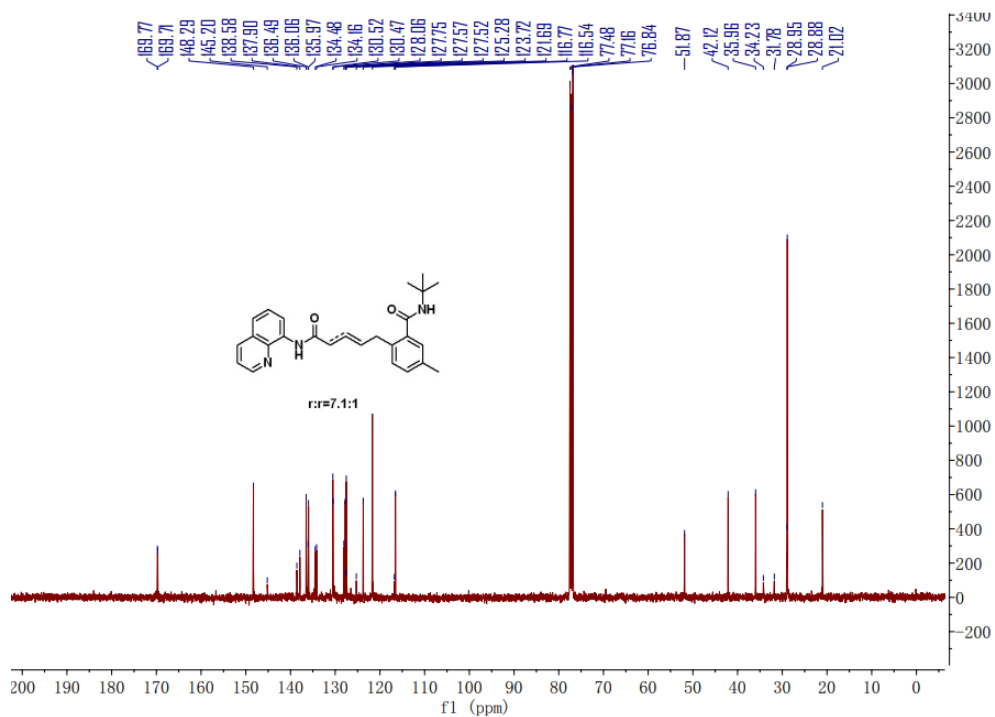

**Figure S14.**  $^{13}\text{C}$  NMR (101 MHz, Chloroform-*d*) spectra of compound **3g**

**(3ha) (E)-N-(tert-butyl)-4,5-dimethyl-2-(5-oxo-5-(quinolin-8-ylamino)pent-2-en-1-yl)benzamide**

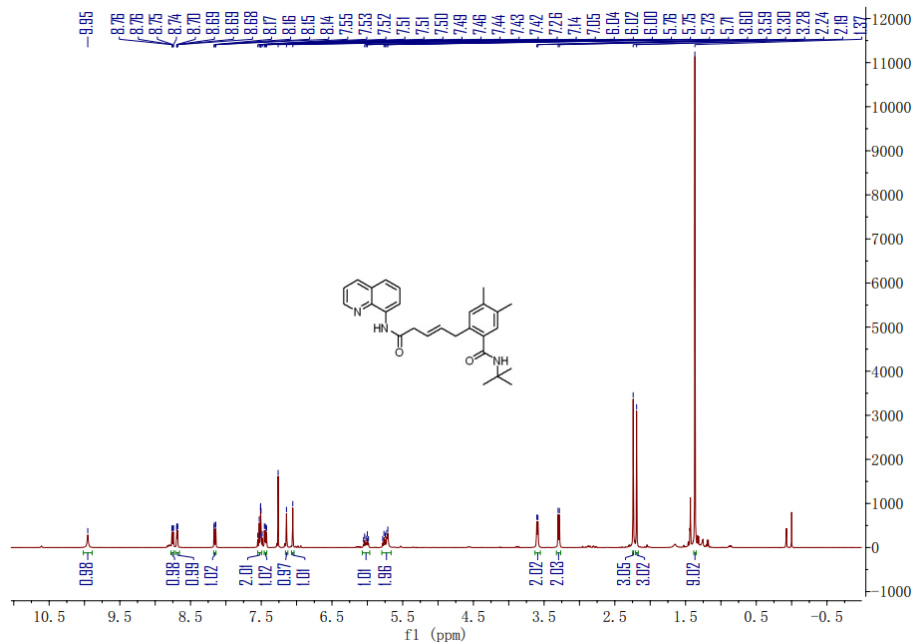

**Figure S15.** <sup>1</sup>H NMR (400 MHz, Chloroform-*d*) spectra of compound **3ha**

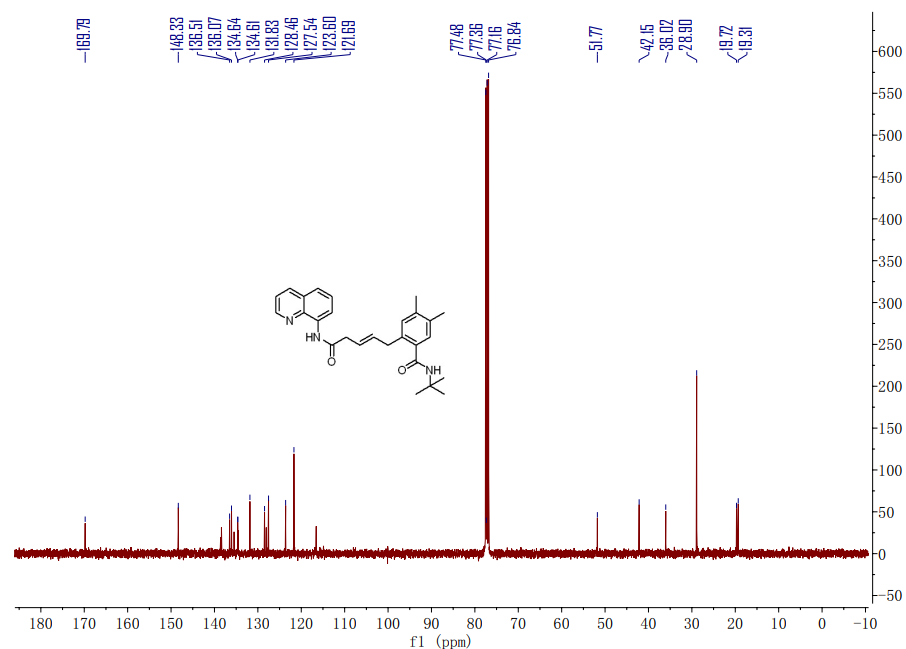

**Figure S16.** <sup>13</sup>C NMR (101 MHz, Chloroform-*d*) spectra of compound **3ha**

**(3ia) (E)-N-(tert-butyl)-4,5-difluoro-2-(5-oxo-5-(quinolin-8-ylamino)pent-2-en-1-yl)benzamide**



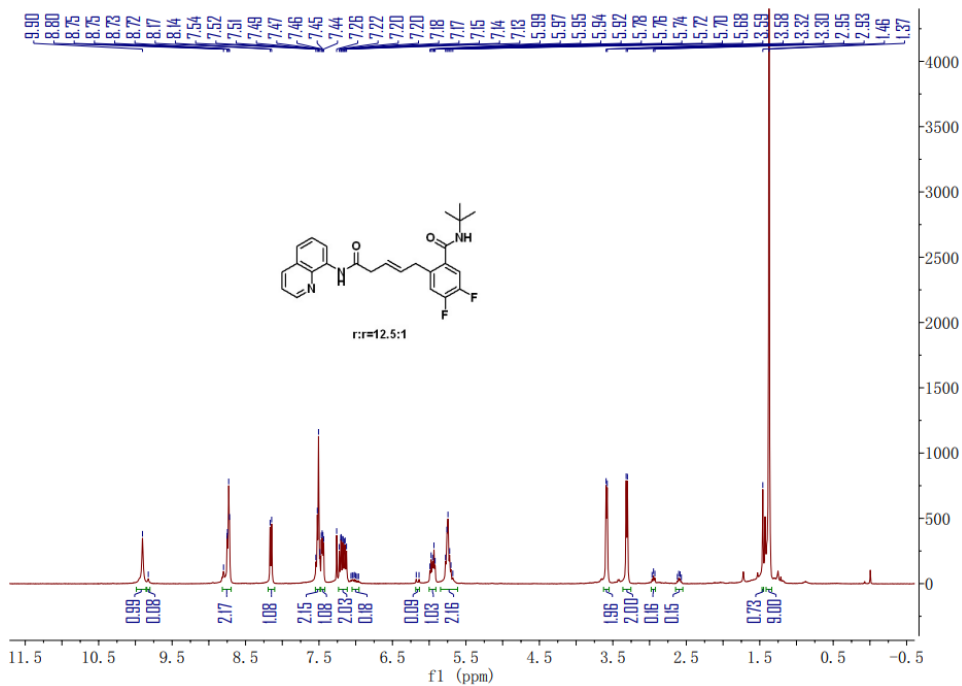

Figure S17. <sup>1</sup>H NMR (400 MHz, Chloroform-*d*) spectra of compound **3ia**

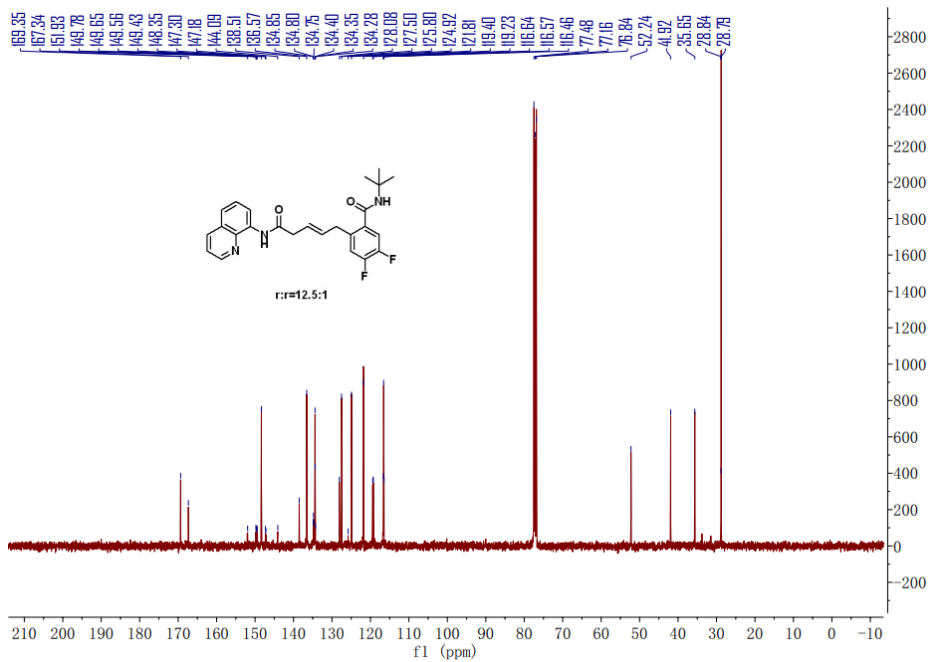

Figure S18. <sup>13</sup>C NMR (101 MHz, Chloroform-*d*) spectra of compound **3ia**

**(3ja) (E)-N-(tert-butyl)-2-(3-4-oxo-6-(quinolin-8-ylamino)hex-3-en-2-yl)benzamide**

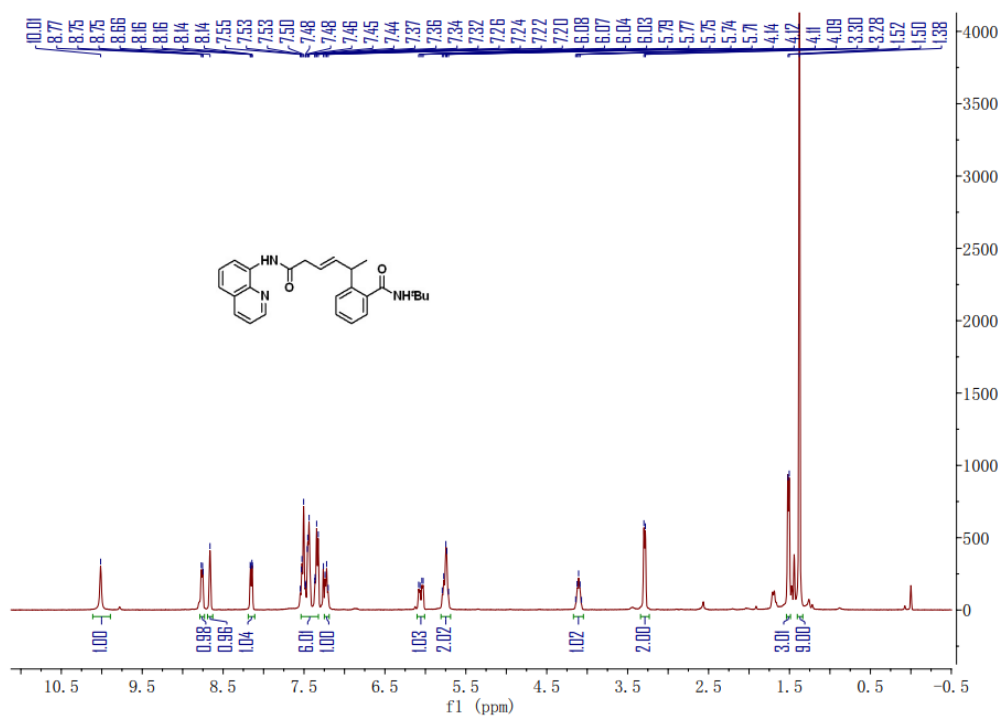

Figure S19.  $^1\text{H}$  NMR (400 MHz, Chloroform-*d*) spectra of compound **3ja**

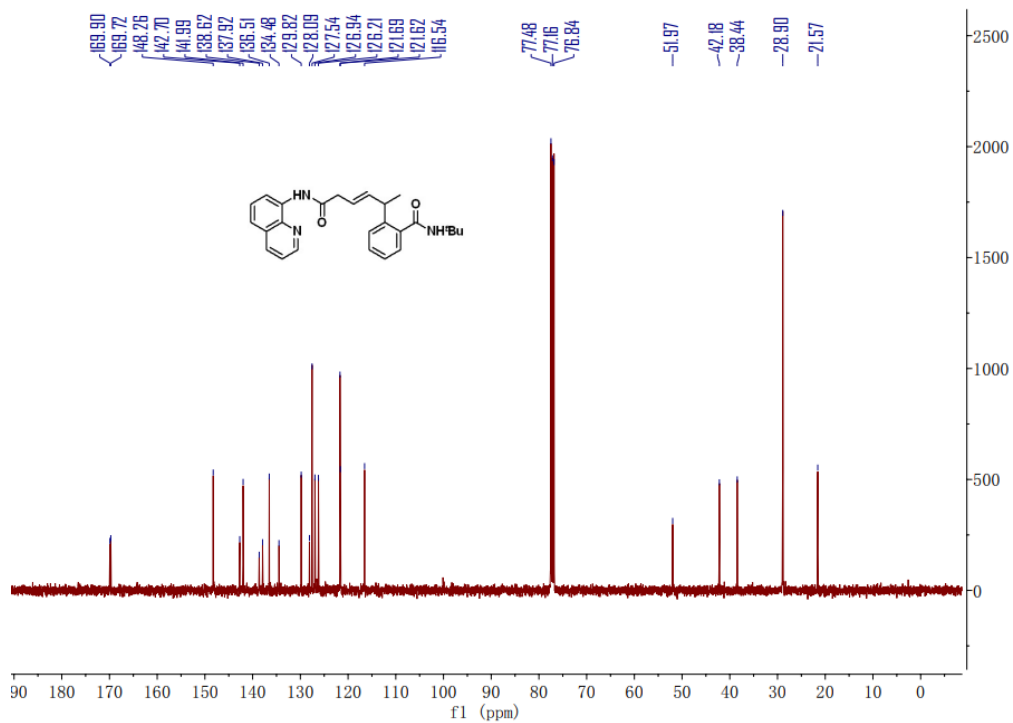

Figure S20.  $^{13}\text{C}$  NMR (101 MHz, Chloroform-*d*) spectra of compound **3ja**

**(3ka) (E)-N-(tert-butyl)-2-(8-oxo-8-(quinolin-8-ylamino)oct-5-en-4-yl)benzamide**

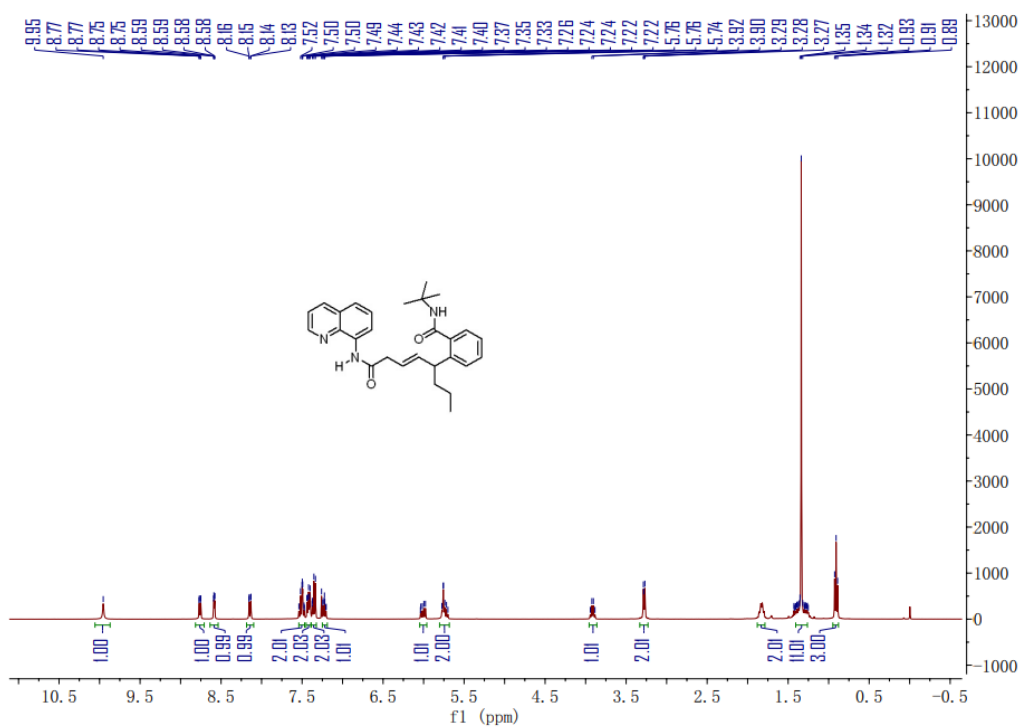

Figure S21. <sup>1</sup>H NMR (400 MHz, Chloroform-*d*) spectra of compound 3ka

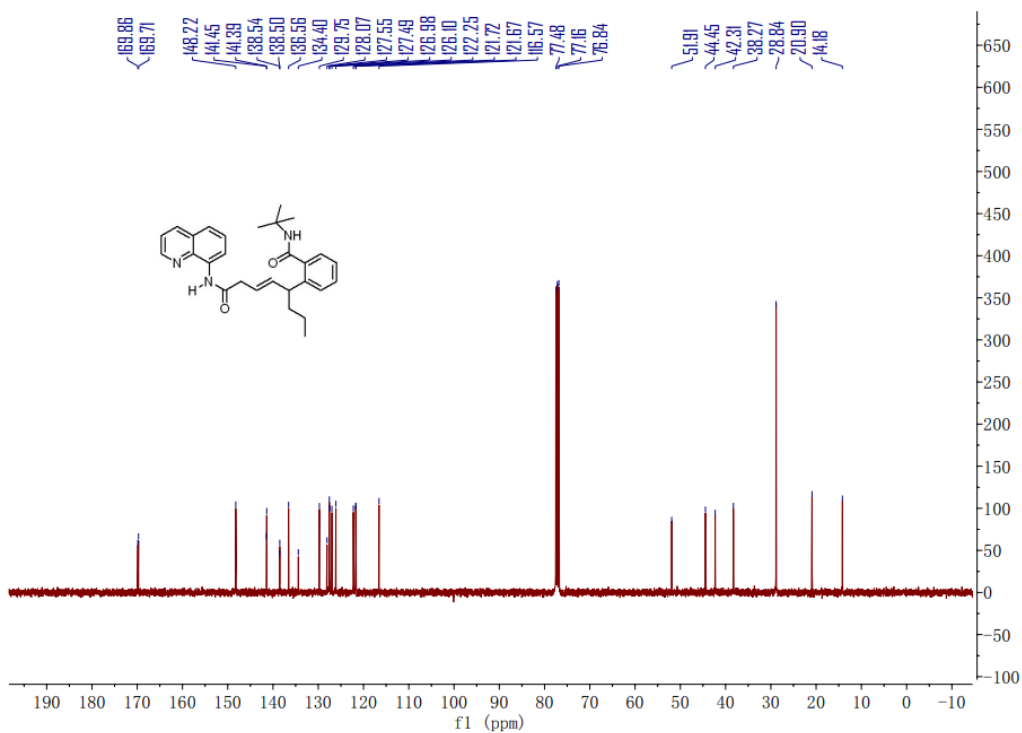

Figure S22. <sup>13</sup>C NMR (101 MHz, Chloroform-*d*) spectra of compound 3ka

(3la) (*E*)-*N*-(*tert*-butyl)-2-(5-oxo-1-phenyl-5-(quinolin-8-ylamino)pent-2-en-1-yl)benzamide

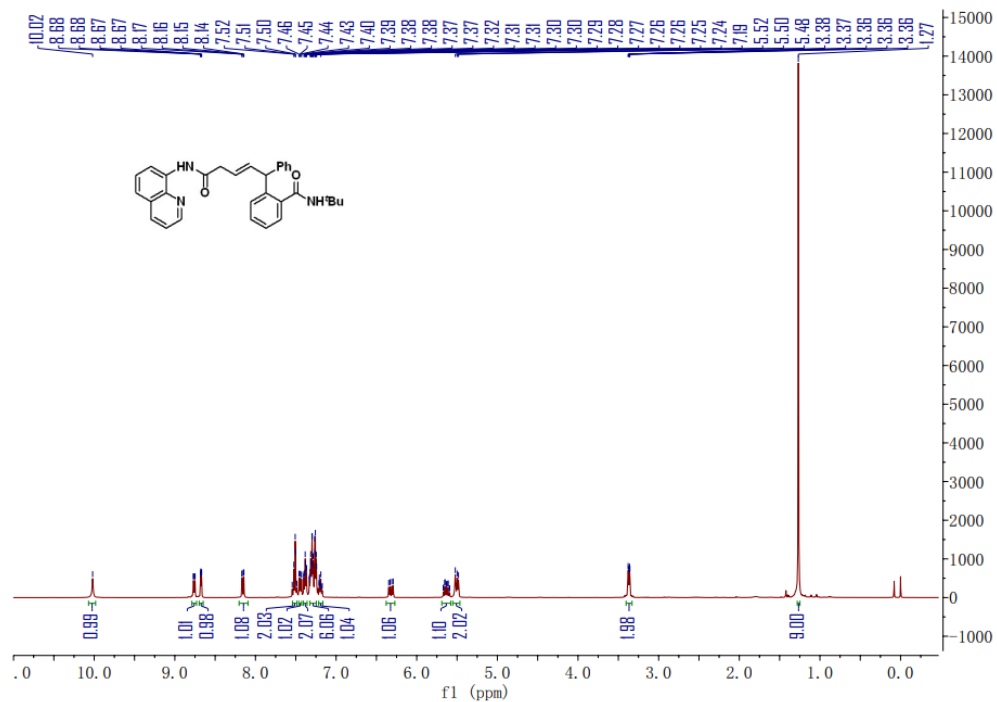

Figure S23.  $^1\text{H}$  NMR (400 MHz, Chloroform-*d*) spectra of compound 3la

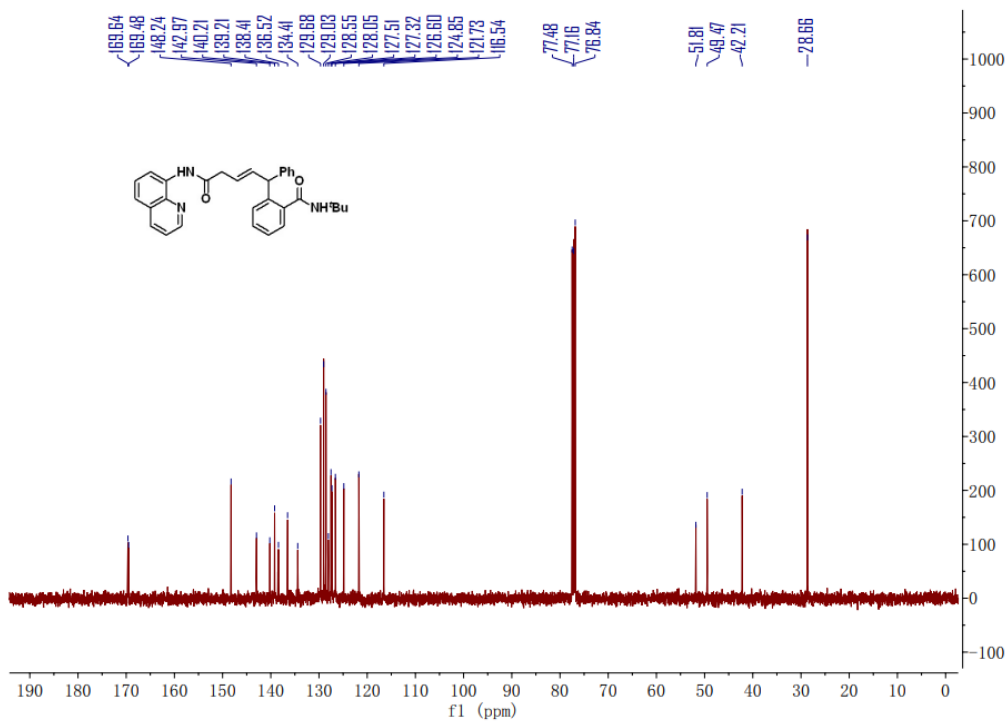

Figure S24.  $^{13}\text{C}$  NMR (101 MHz, Chloroform-*d*) spectra of compound 3la

(3ma) (*E*)-*N*-(*tert*-butyl)-2-(3-4-oxo-1-phenyl-6-(quinolin-8-ylamino)hex-3-en-2-yl)benzamide

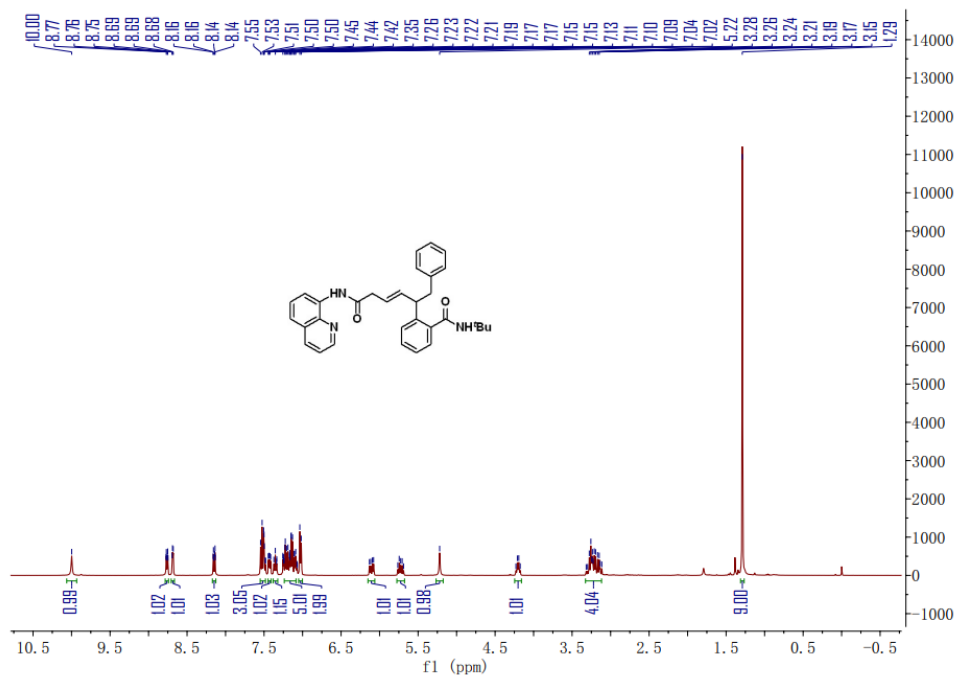

Figure S25.  $^1\text{H}$  NMR (400 MHz, Chloroform- $d$ ) spectra of compound 3ma

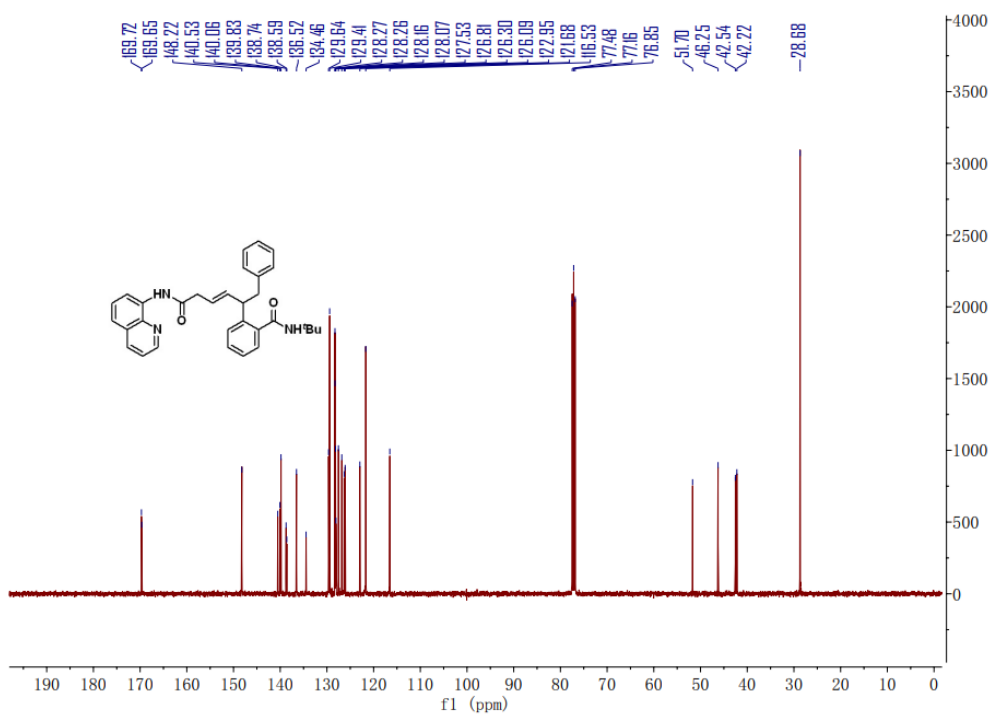

Figure S26.  $^{13}\text{C}$  NMR (101 MHz, Chloroform- $d$ ) spectra of compound 3ma

(3na) (*E*)-2-(5-oxo-5-(quinolin-8-ylamino)pent-2-en-1-yl)-*N*-(*tert*pentyl)benzamide

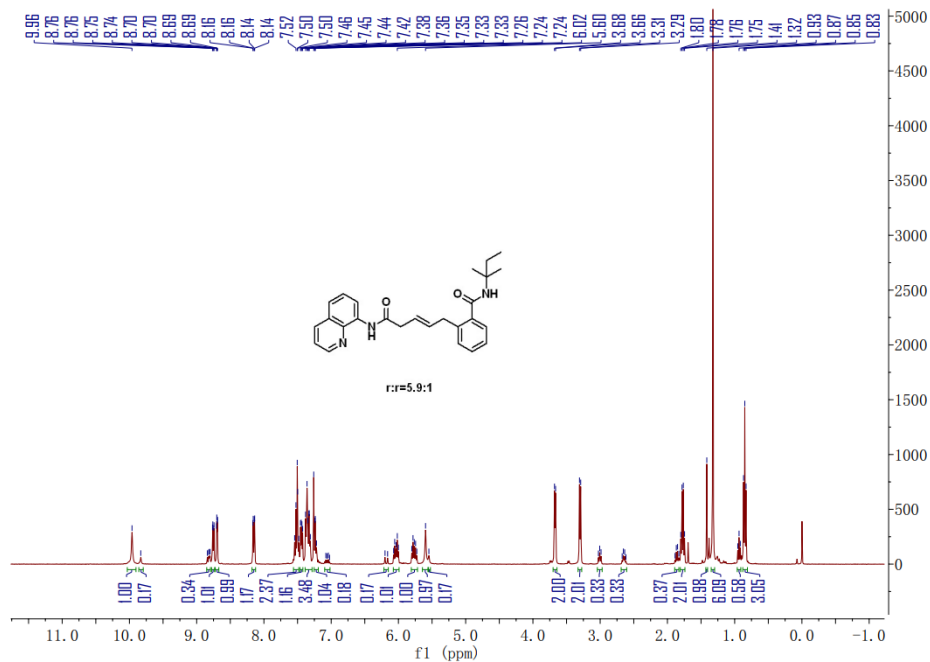

Figure S27.  $^1\text{H}$  NMR (400 MHz, Chloroform- $d$ ) spectra of compound 3na

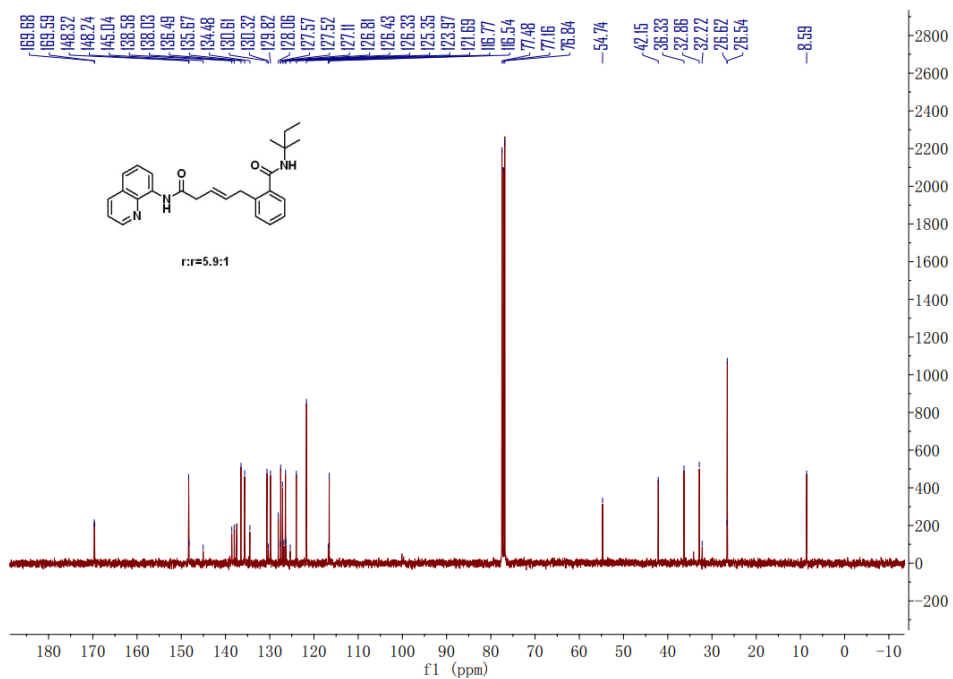

Figure S28.  $^{13}\text{C}$  NMR (101 MHz, Chloroform- $d$ ) spectra of compound 3na

(3ab) (*E*)-*N*-(*tert*-butyl)-2-(2-methyl-5-oxo-5-(quinolin-8-ylamino)pent-2-en-1-yl)benzamide

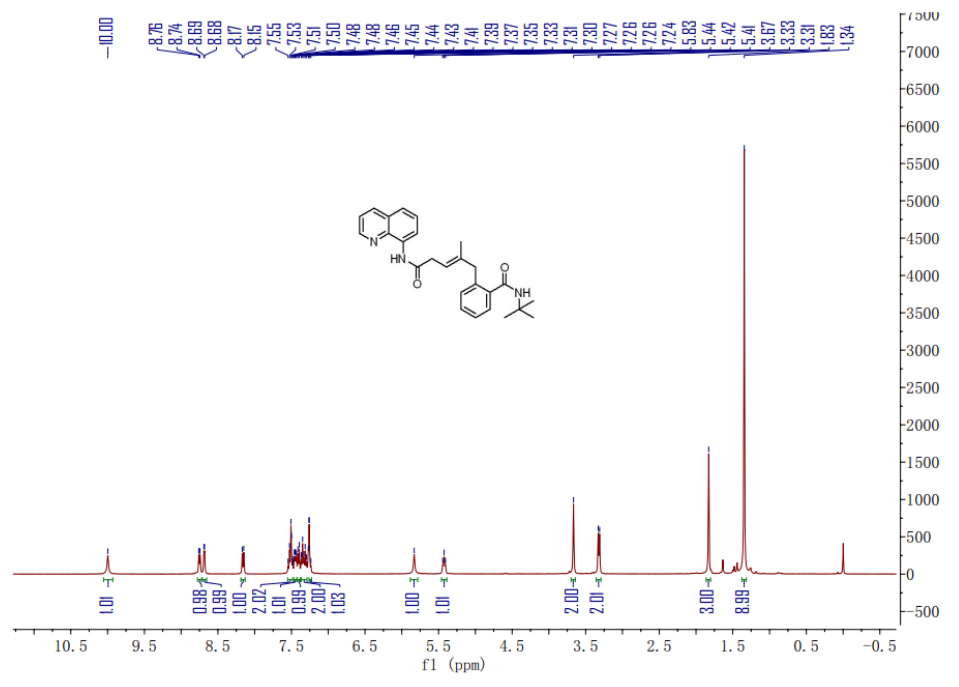

Figure S29.  $^1\text{H}$  NMR (400 MHz, Chloroform-*d*) spectra of compound **3ab**

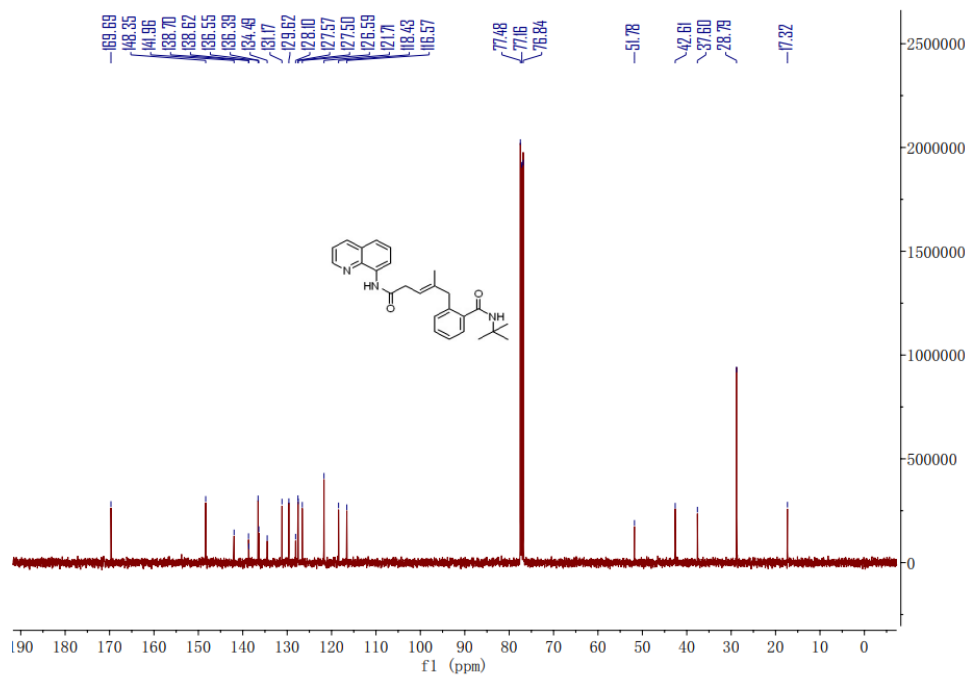

Figure S30.  $^{13}\text{C}$  NMR (101 MHz, Chloroform-*d*) spectra of compound **3ab**

(3ac) (*E*)-*N*-(*tert*-butyl)-2-(2-ethyl-5-oxo-5-(quinolin-8-ylamino)pent-2-en-1-yl)benzamide

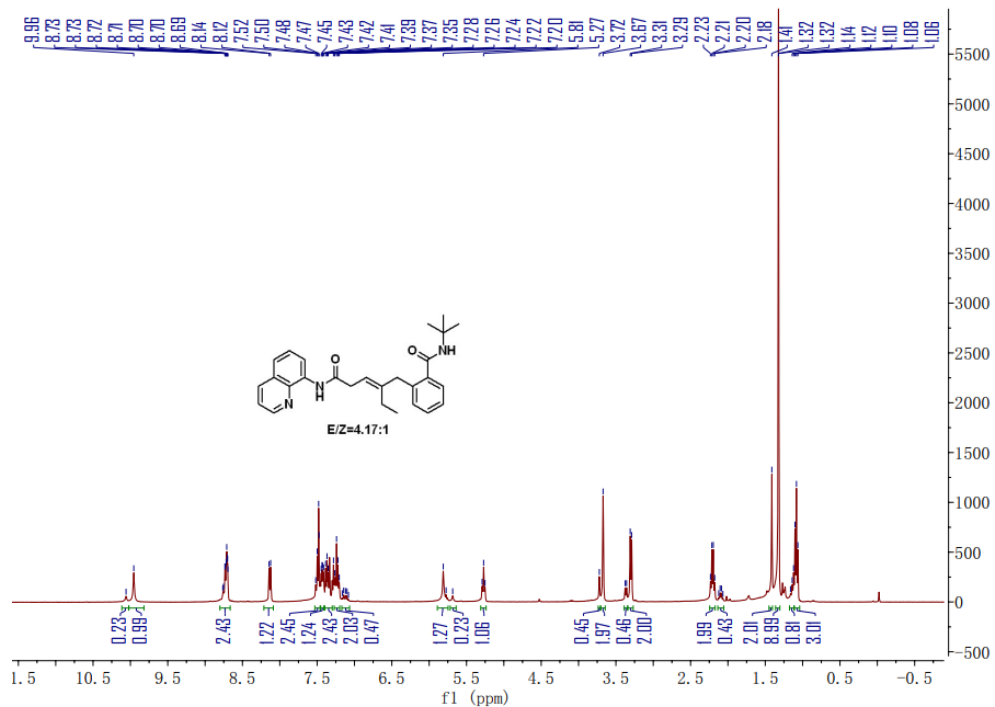

Figure S31.  $^1\text{H}$  NMR (400 MHz, Chloroform-*d*) spectra of compound **3ac**

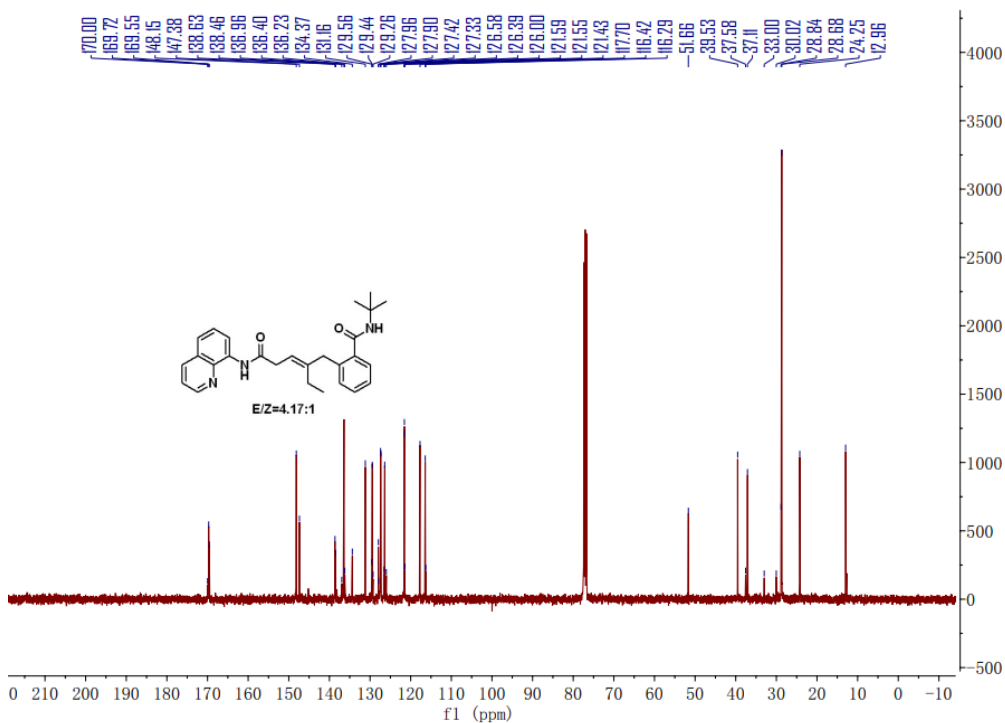

Figure S32.  $^{13}\text{C}$  NMR (101 MHz, Chloroform-*d*) spectra of compound **3ac**

(**3ad**) (*E*)-*N*-(*tert*-butyl)-2-(5-oxo-2-propyl-5-(quinolin-8-ylamino)pent-2-en-1-yl)benzamide



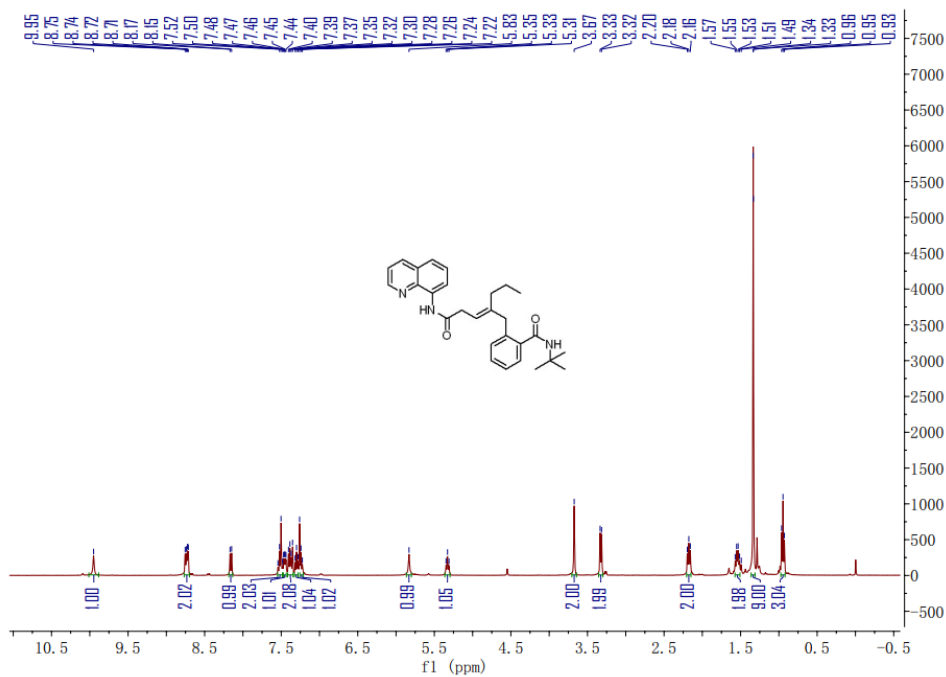

Figure S33.  $^1\text{H}$  NMR (400 MHz, Chloroform-*d*) spectra of compound **3ad**

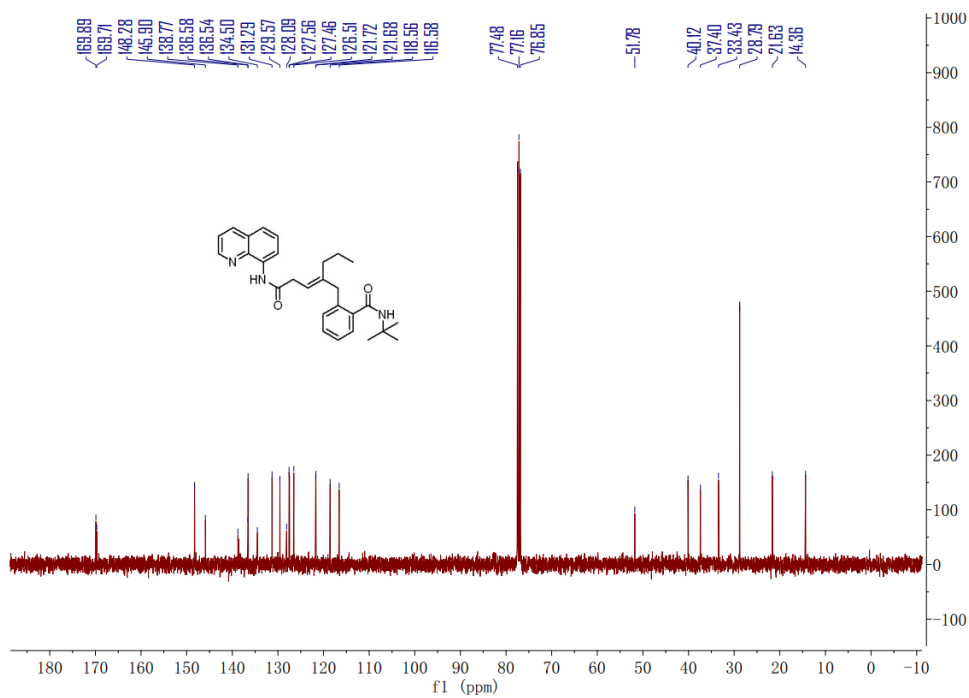

Figure S34.  $^{13}\text{C}$  NMR (101 MHz, Chloroform-*d*) spectra of compound **3ad**

**(3ae) (*E*)-*N*-(*tert*-butyl)-2-(4-methyl-5-oxo-5-(quinolin-8-ylamino)pent-2-en-1-yl)benzamide**

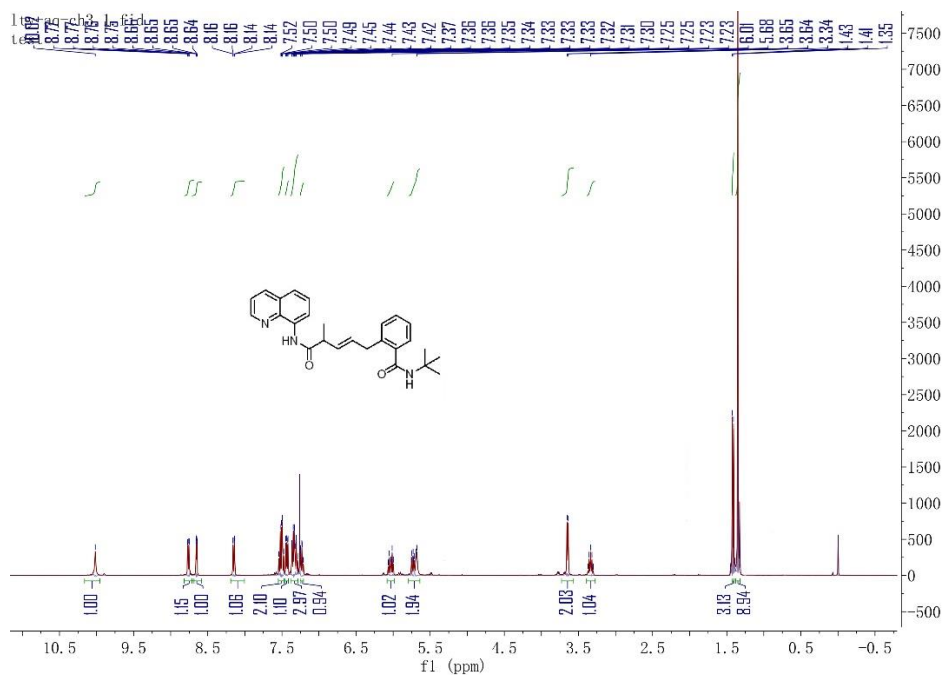

Figure S35.  $^1\text{H}$  NMR (400 MHz, Chloroform- $d$ ) spectra of compound 3ae

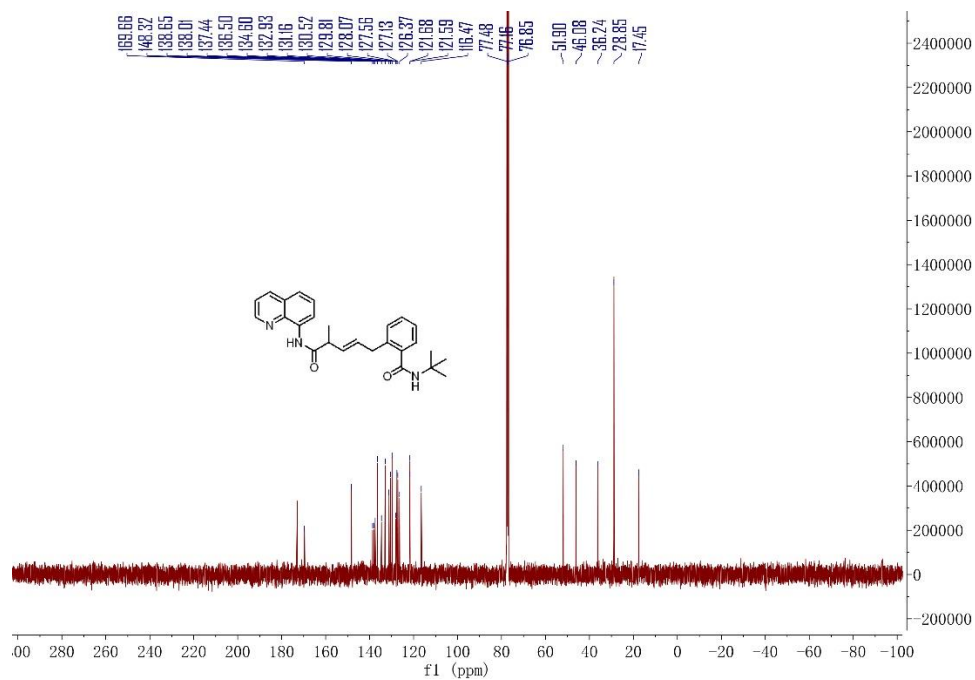

Figure S36.  $^{13}\text{C}$  NMR (101 MHz, Chloroform- $d$ ) spectra of compound 3ae

(3af) *(E)*-*N*-(*tert*-butyl)-2-(1-oxo-1-(quinolin-8-ylamino)non-3-en-5-yl)benzamid

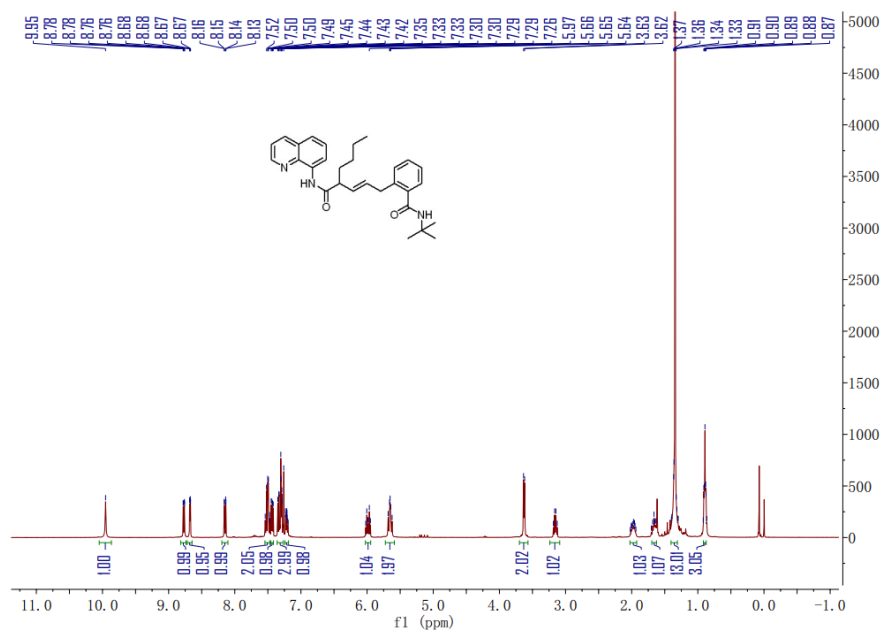

Figure S37.  $^1\text{H}$  NMR (400 MHz, Chloroform-*d*) spectra of compound **3af**

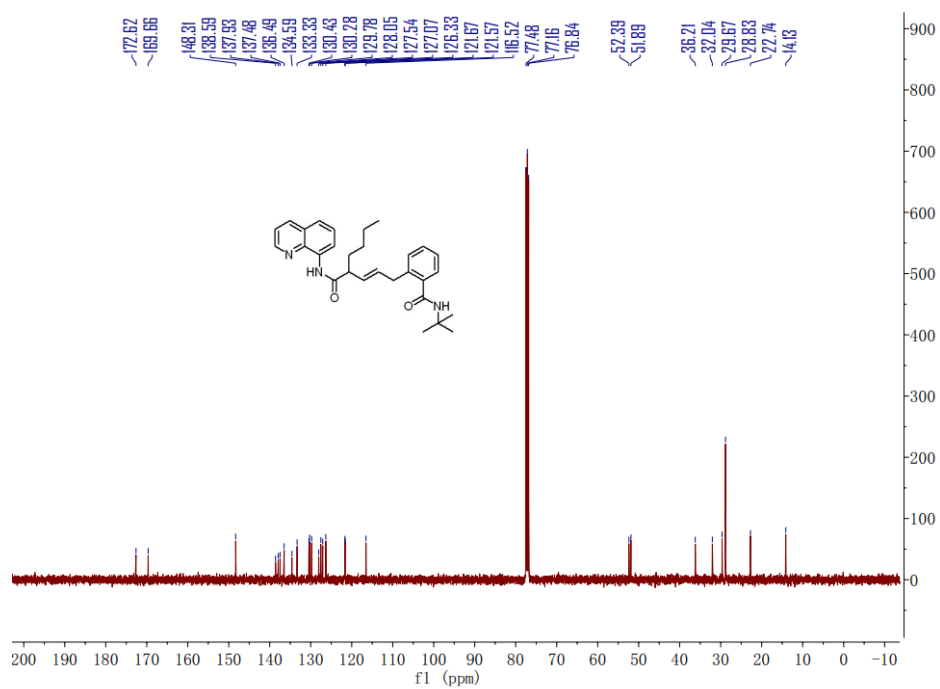

Figure S38.  $^{13}\text{C}$  NMR (101 MHz, Chloroform-*d*) spectra of compound **3af**

**(3ag) (E)-2-(4-benzyl-5-oxo-5-(quinolin-8-ylamino)pent-2-en-1-yl)-N-(tert-butyl)benzamide**

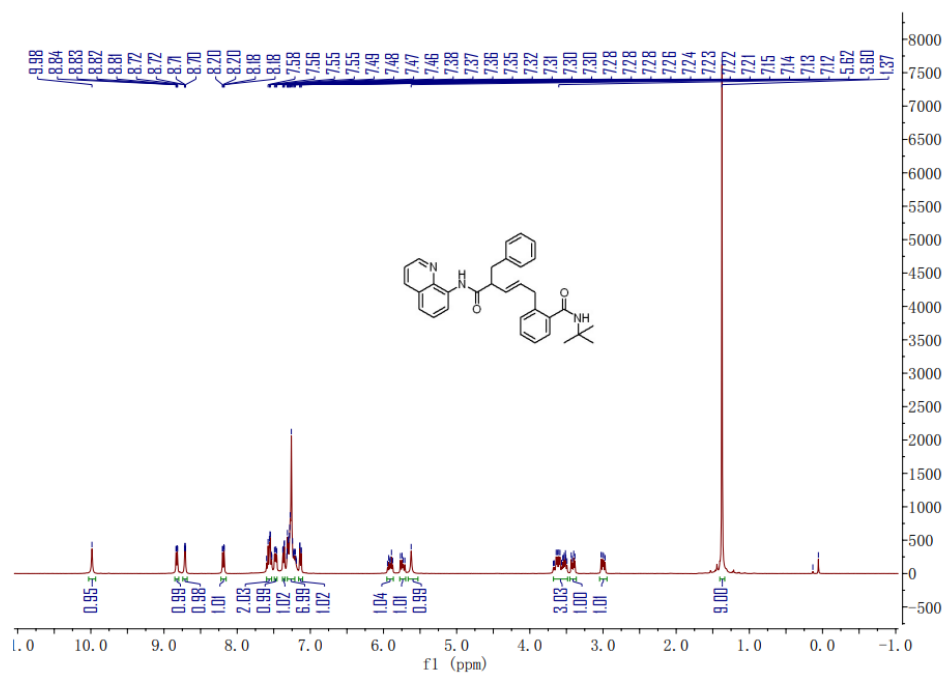

**Figure S39.** <sup>1</sup>H NMR (400 MHz, Chloroform-*d*) spectra of compound **3ag**

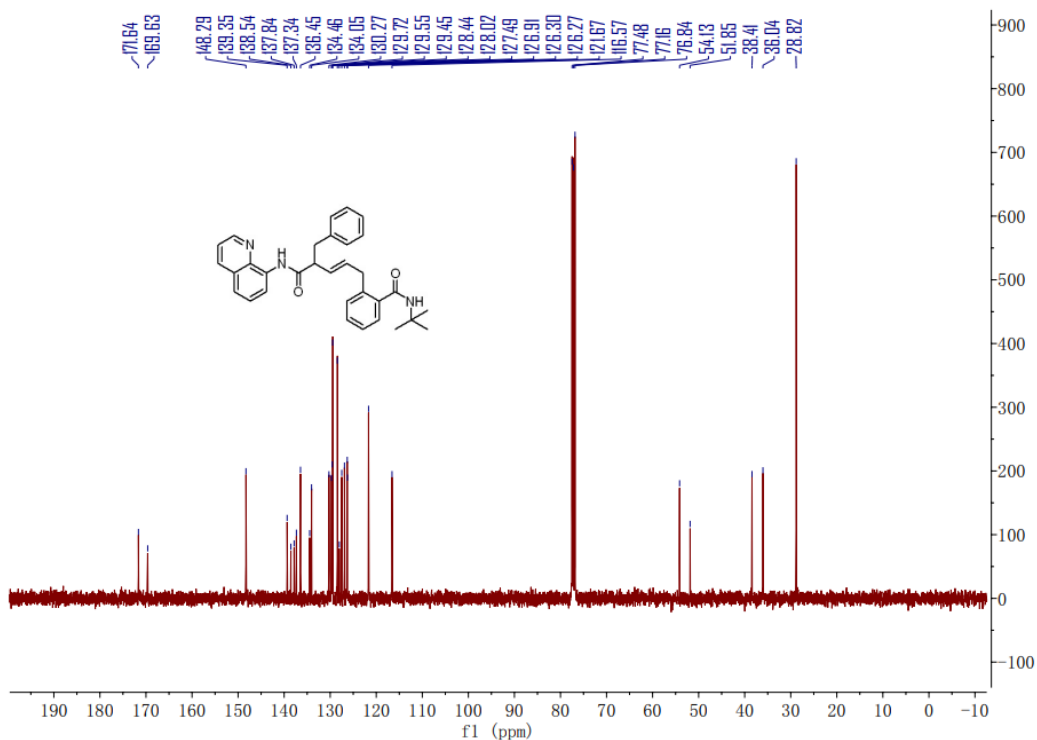

**Figure S40.** <sup>13</sup>C NMR (101 MHz, Chloroform-*d*) spectra of compound **3ag**

**(3ah) (E)-N-(tert-butyl)-2-(4-(4-methylbenzyl)-5-oxo-5-(quinolin-8-ylamino)pent-2-en-1-yl)benzamide**

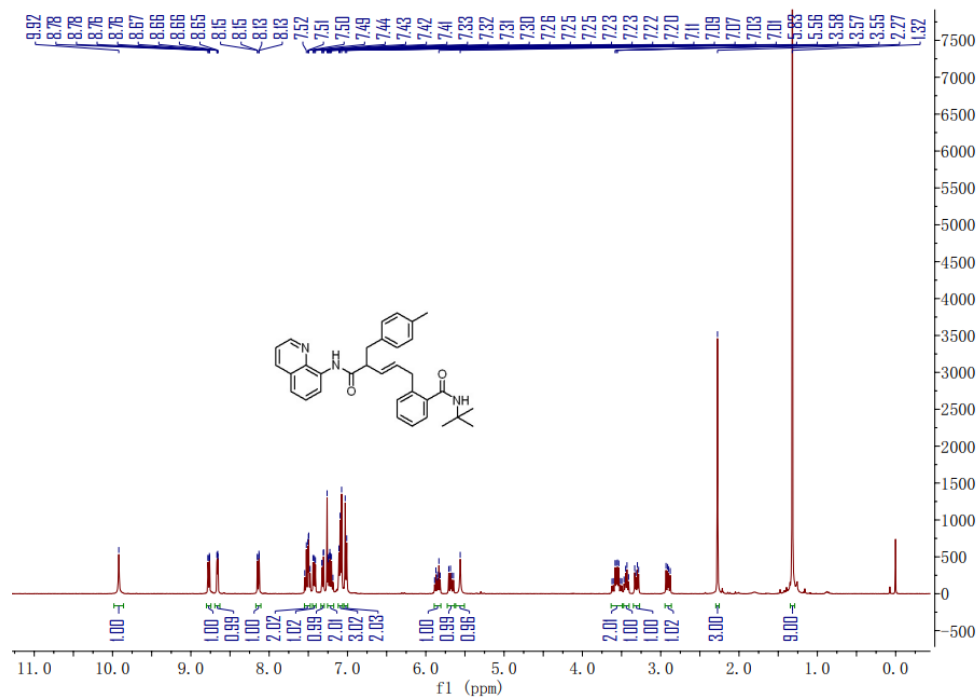

**Figure S41.** <sup>1</sup>H NMR (400 MHz, Chloroform-*d*) spectra of compound **3ah**

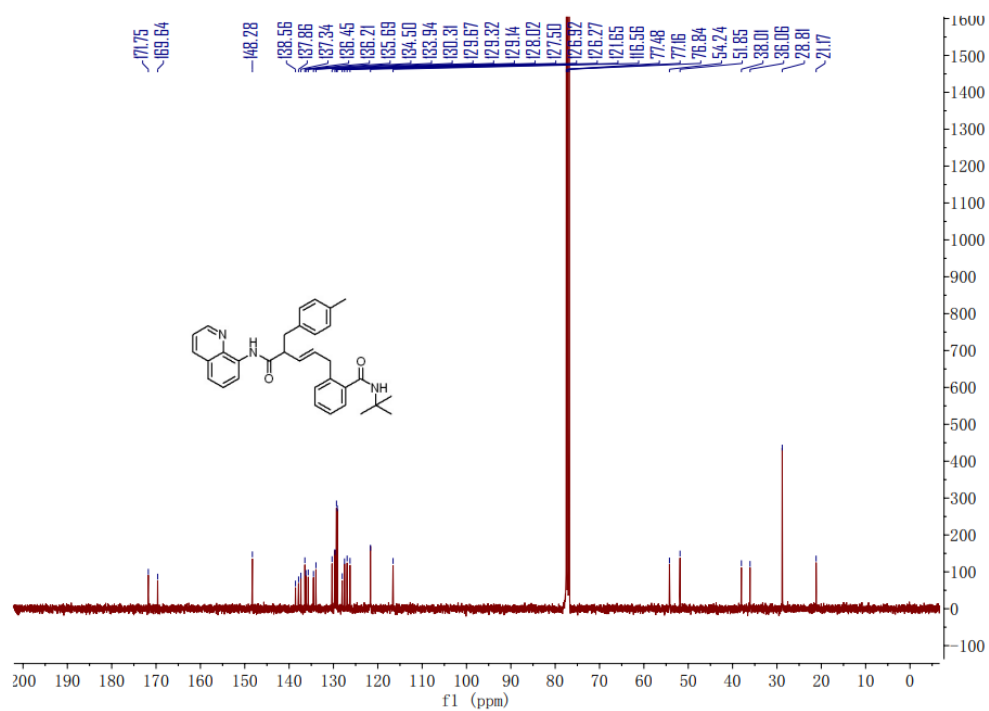

**Figure S42.** <sup>13</sup>C NMR (101 MHz, Chloroform-*d*) spectra of compound **3ah**

**(3aj) (E)-N-(tert-butyl)-2-(4,4-dimethyl-5-oxo-5-(quinolin-8-ylamino)pent-2-en-1-yl)benzamide**

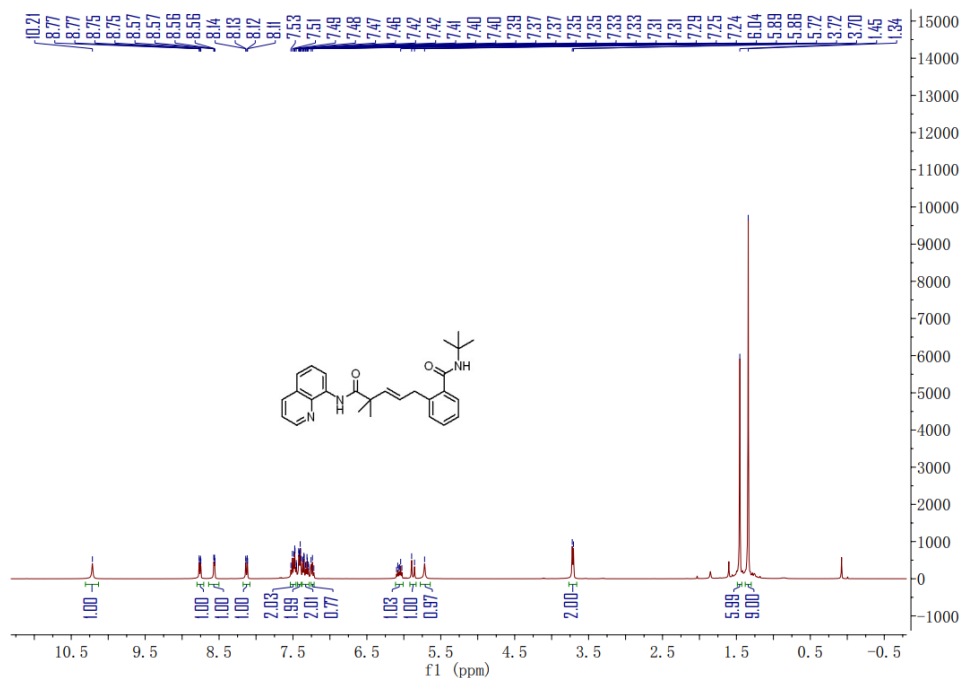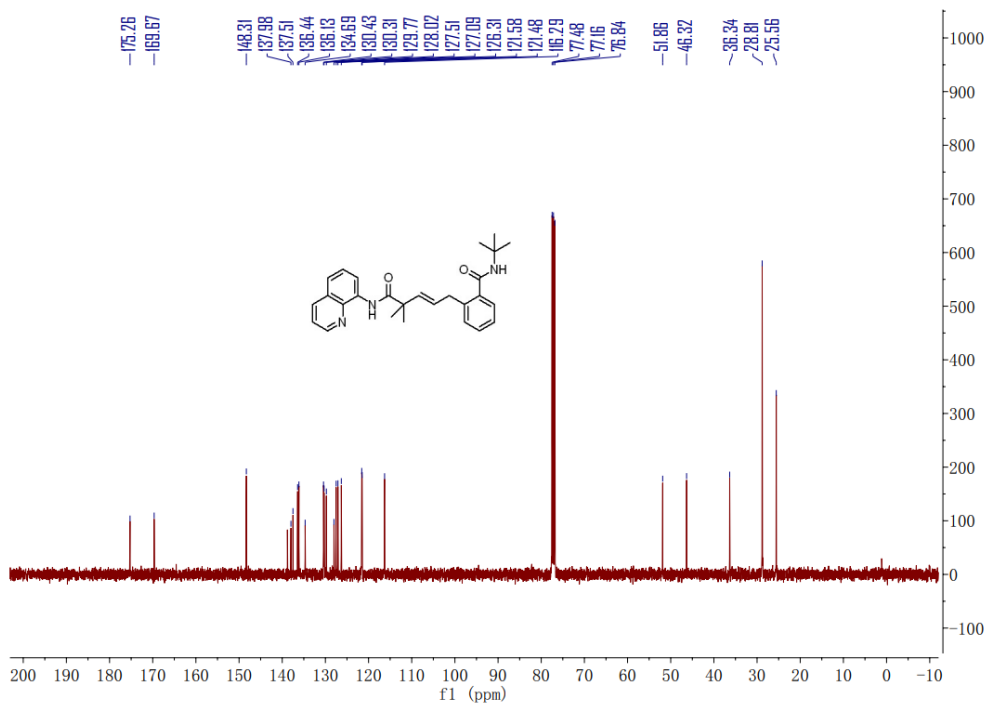

**(4aa) 2,2'-(2-(2-3-oxo-3-(quinolin-8-ylamino)propylidene)propane-1,3-diyl)bis(*N*-(*tert*-butyl)benzamide)**

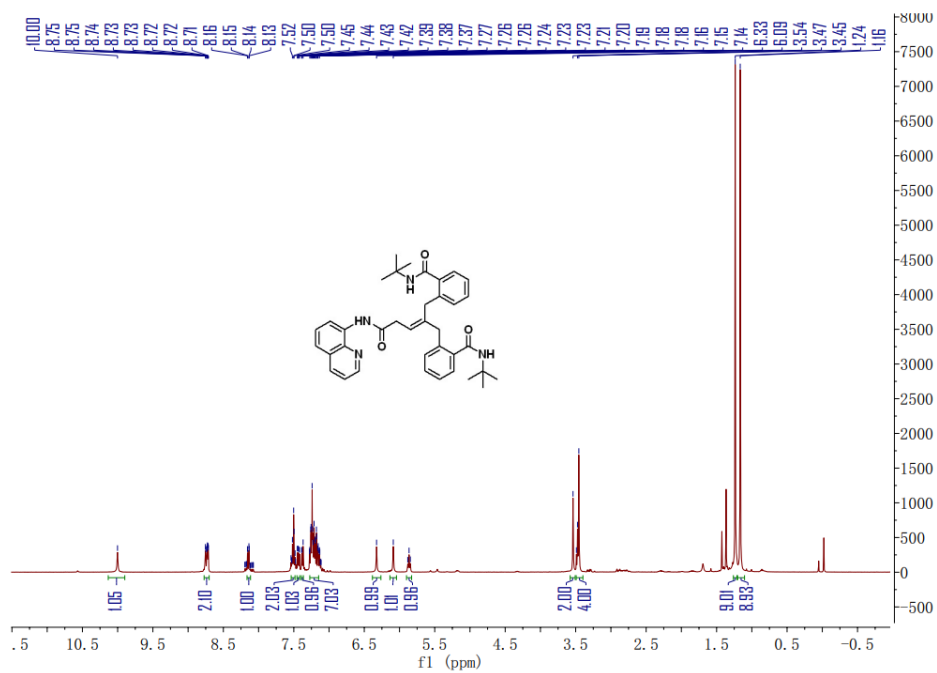

**Figure S45.** <sup>1</sup>H NMR (400 MHz, Chloroform-*d*) spectra of compound **4aa**

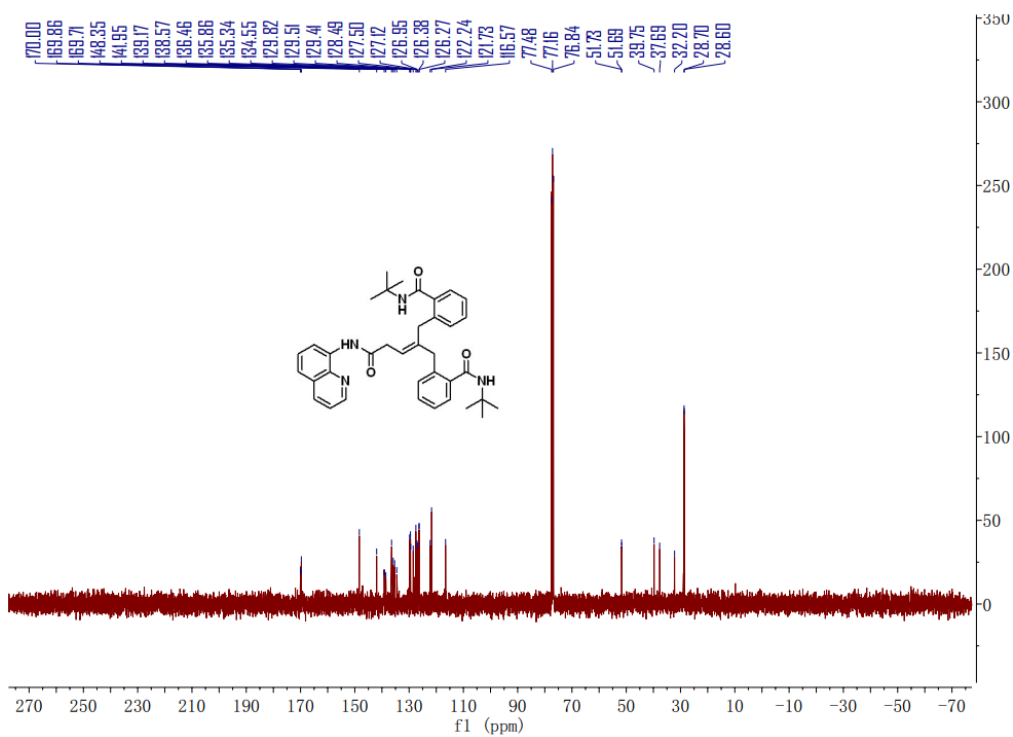

**Figure S46.** <sup>13</sup>C NMR (101 MHz, Chloroform-*d*) spectra of compound **4aa**

**(4ea) 2,2'-(2-(2-3-oxo-3-(quinolin-8-ylamino)propylidene)propane-1,3-diyl)bis(*N*-(*tert*-butyl)-4-chlorobenzamide)**

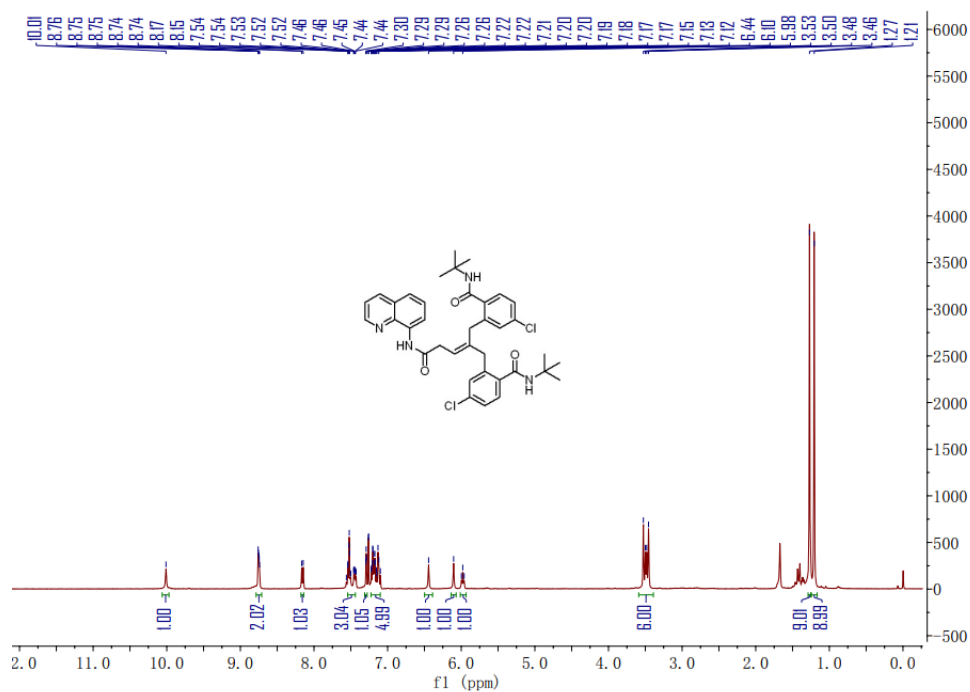

**Figure S47.**  $^1\text{H}$  NMR (400 MHz, Chloroform-*d*) spectra of compound **4ea**

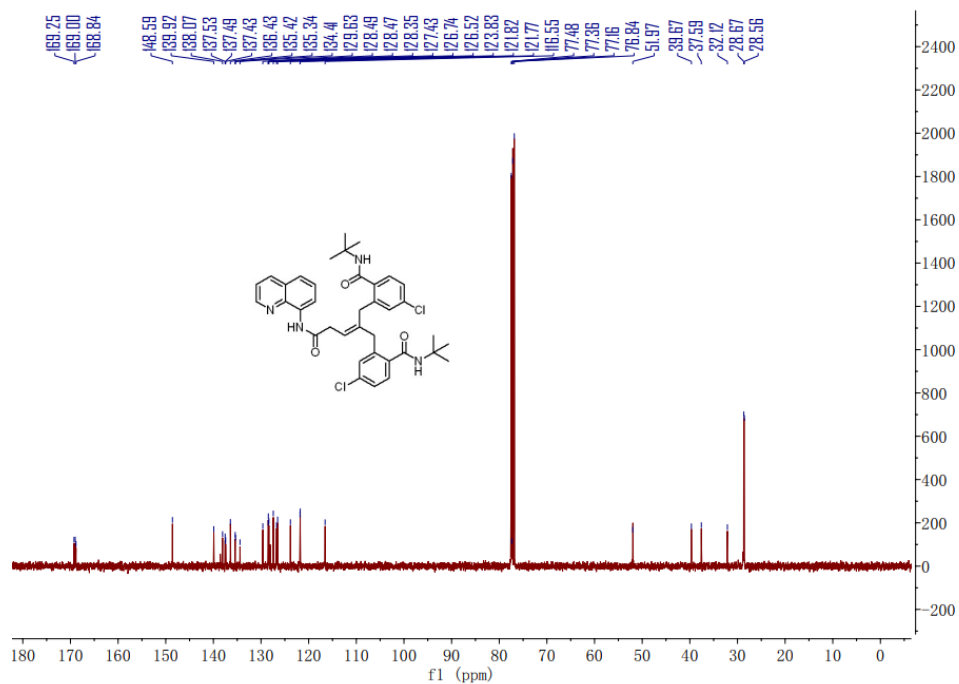

**Figure S48.**  $^{13}\text{C}$  NMR (101 MHz, Chloroform-*d*) spectra of compound **4ea**



**(4fa) 3,3''-(2-(2-3-oxo-3-(quinolin-8-ylamino)propylidene)propane-1,3-diyl)bis(*N*-(*tert*-butyl)-[1,1'-biphenyl]-4-carboxamide)**

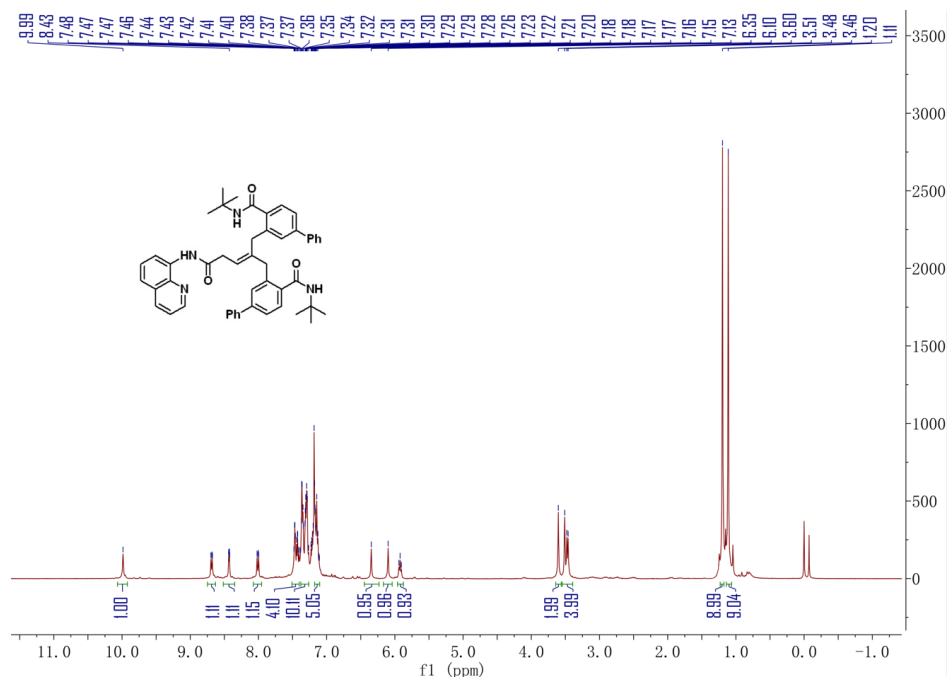

**Figure S49.**  $^1\text{H}$  NMR (400 MHz, Chloroform-*d*) spectra of compound **4fa**

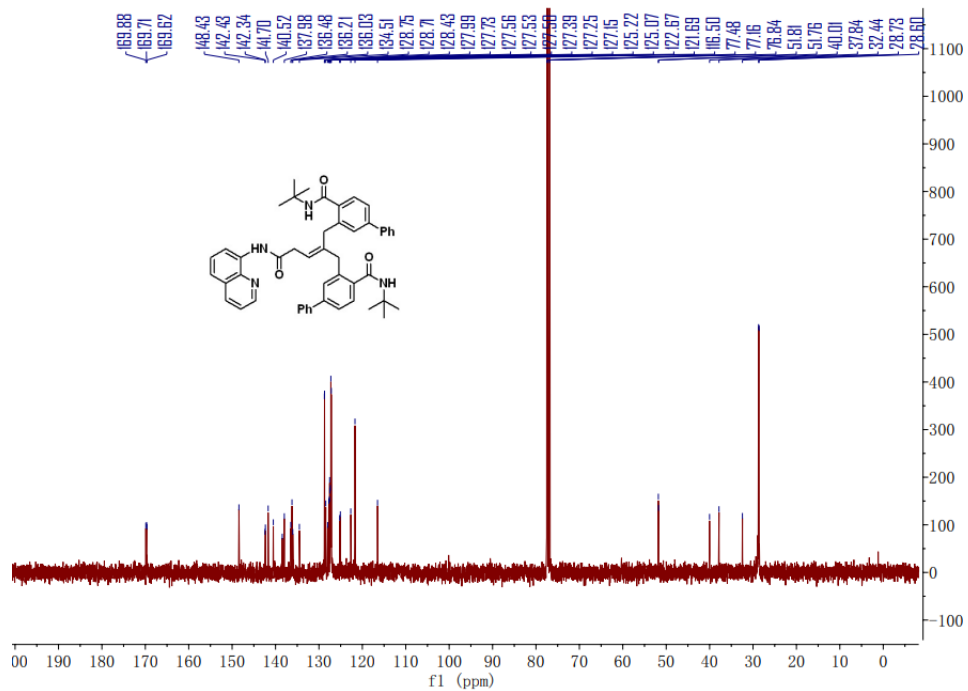

**Figure S50.**  $^{13}\text{C}$  NMR (101 MHz, Chloroform-*d*) spectra of compound **4fa**

**(4na) 2,2'-(2-(2-3-oxo-3-(quinolin-8-ylamino)propylidene)propane-1,3-diyl)bis(*N*-(*tert*-pentyl)benzamide)**

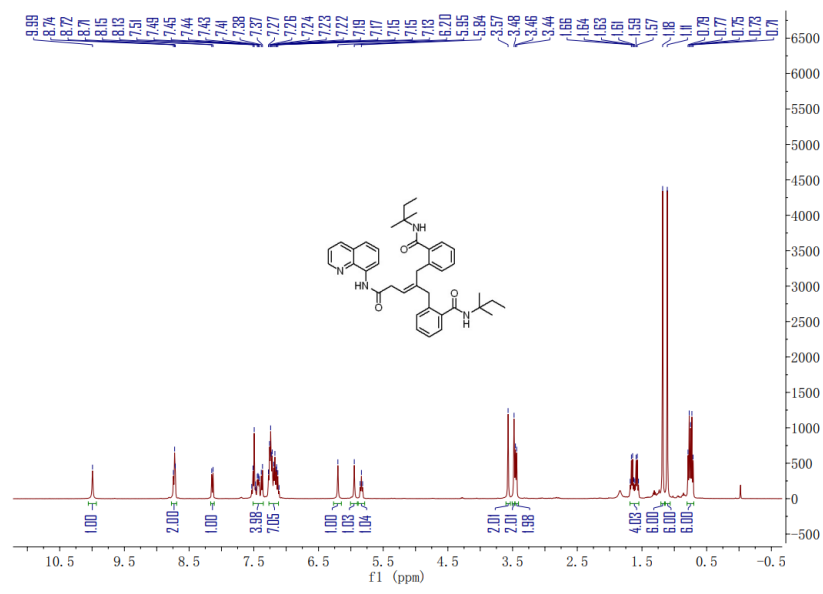

**Figure S51.** <sup>1</sup>H NMR (400 MHz, Chloroform-*d*) spectra of compound 4na

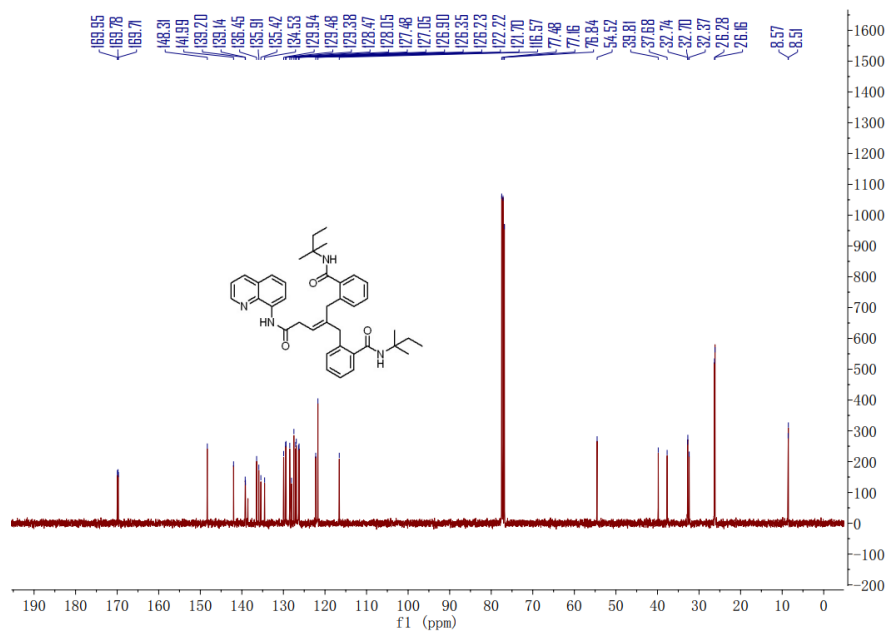

**Figure S52.** <sup>13</sup>C NMR (101 MHz, Chloroform-*d*) spectra of compound 4na

**(4ae) 2,2'-(2-(2-methyl-3-oxo-3-(quinolin-8-ylamino)propylidene)propane-1,3-diyl)bis(*N*-(*tert*-butyl)benzamide)**

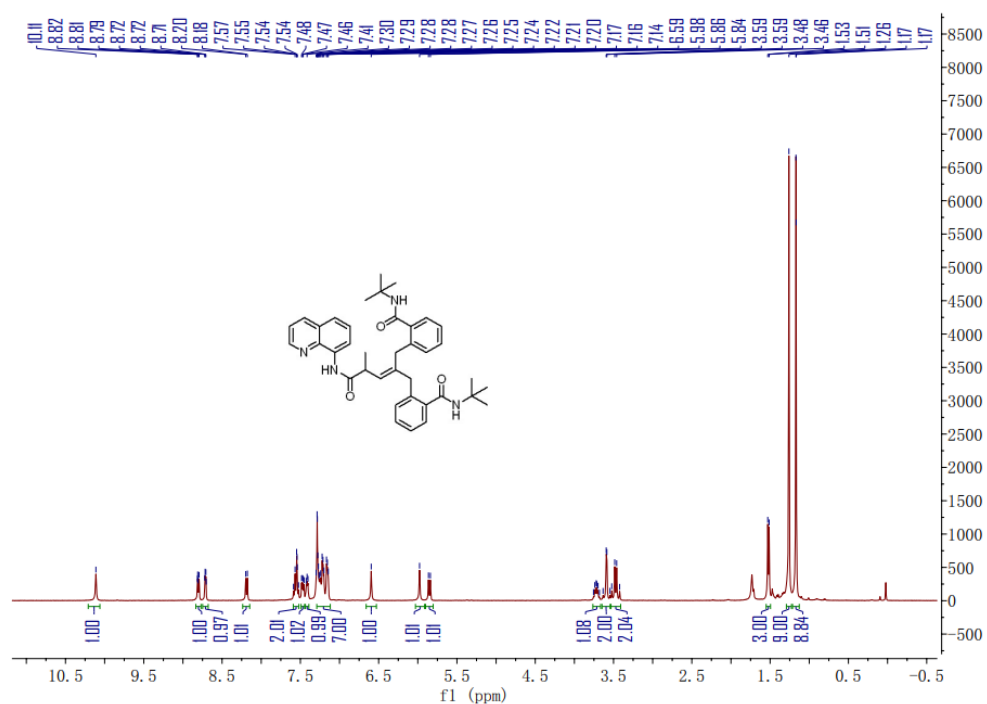

**Figure S53.** <sup>1</sup>H NMR (400 MHz, Chloroform-*d*) spectra of compound **4ae**

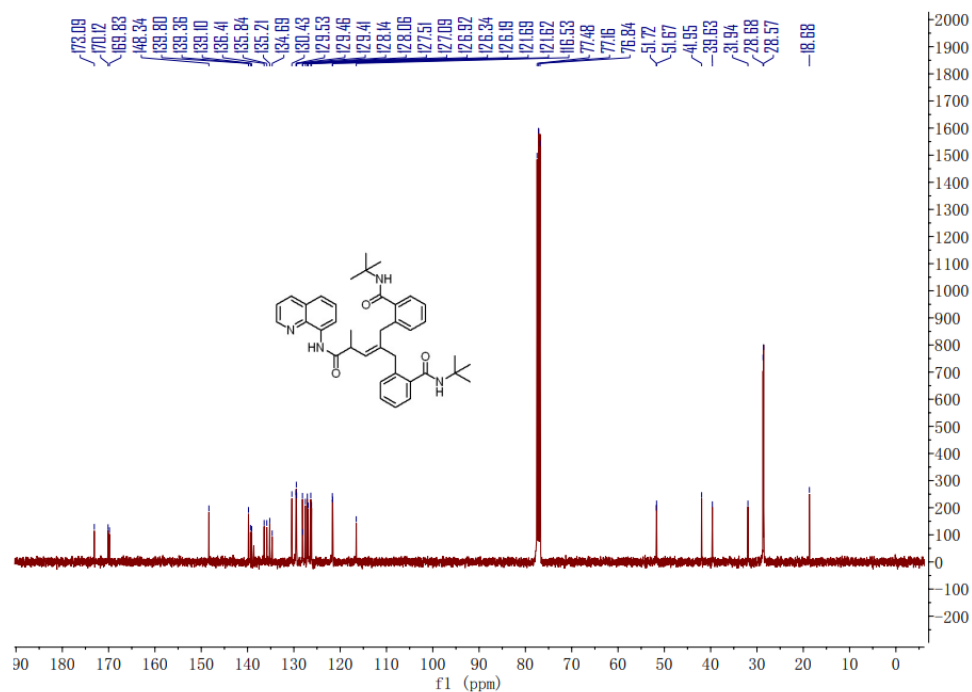

**Figure S54.** <sup>13</sup>C NMR (101 MHz, Chloroform-*d*) spectra of compound **4ae**

(4af) 2,2'-(2-(2-(quinolin-8-ylcarbamoyl)hexylidene)propane-1,3-diyl)bis(*N*-(*tert*-butyl)benzamide)

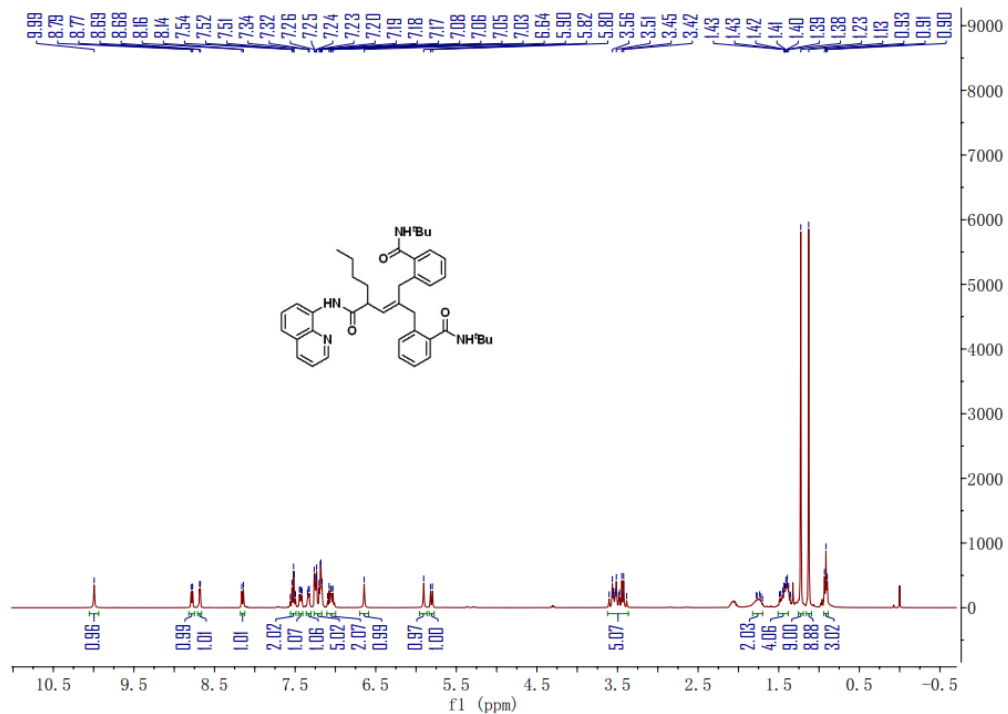

Figure S55.  $^1\text{H}$  NMR (400 MHz, Chloroform-*d*) spectra of compound 4af

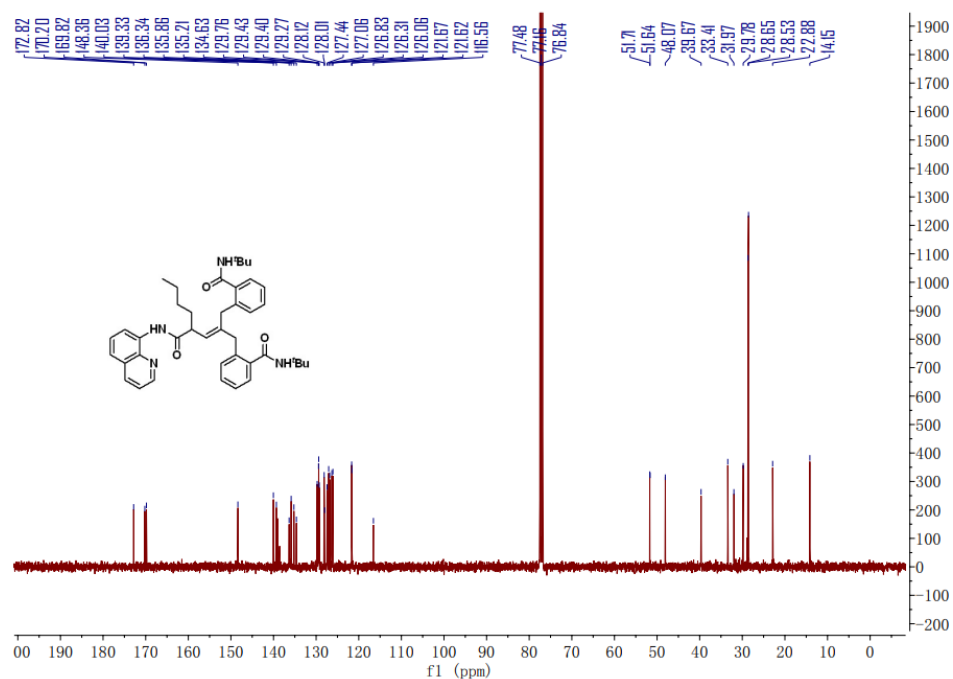

Figure S56.  $^{13}\text{C}$  NMR (101 MHz, Chloroform-*d*) spectra of compound 4af

**(4ag) 2,2'-(2-(2-benzyl-3-oxo-3-(quinolin-8-ylamino)propylidene)propane-1,3-diyl)bis(*N*-(*tert*-butyl)benzamide)**

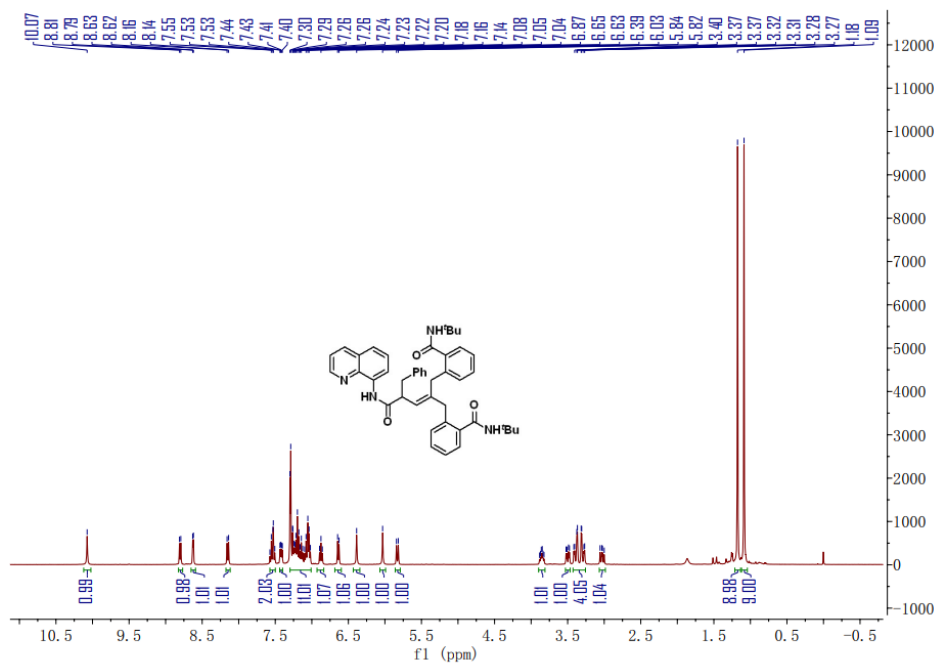

**Figure S57.** <sup>1</sup>H NMR (400 MHz, Chloroform-*d*) spectra of compound **4ag**

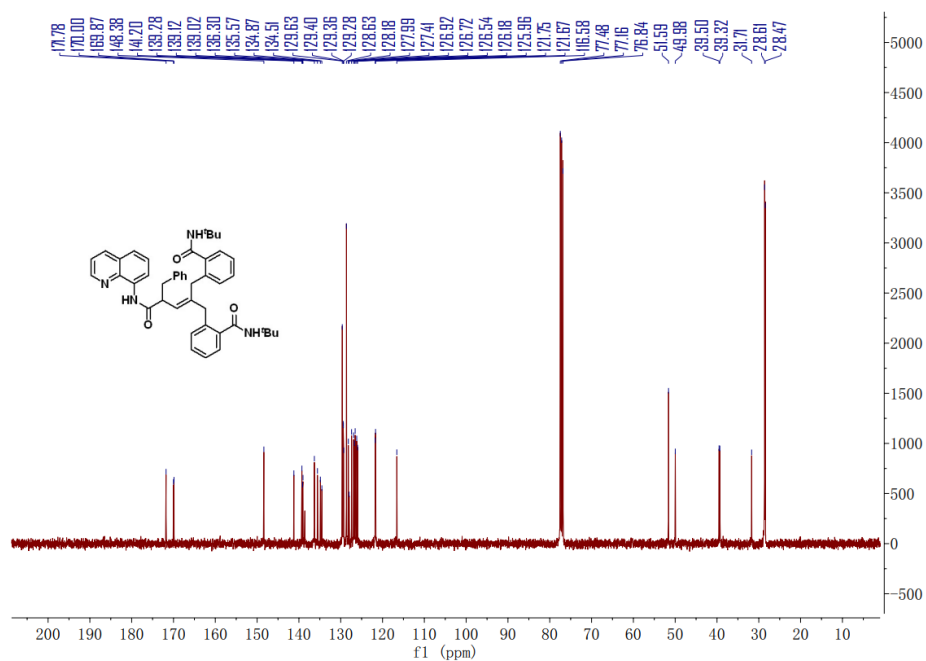

**Figure S58.** <sup>13</sup>C NMR (101 MHz, Chloroform-*d*) spectra of compound **4ag**

**(4ah) 2,2'-(2-(2-(4-methylbenzyl)-3-oxo-3-(quinolin-8-ylamino)propylidene)propane-1,3-diyl)bis(*N*-(*tert*-butyl)benzamide)**

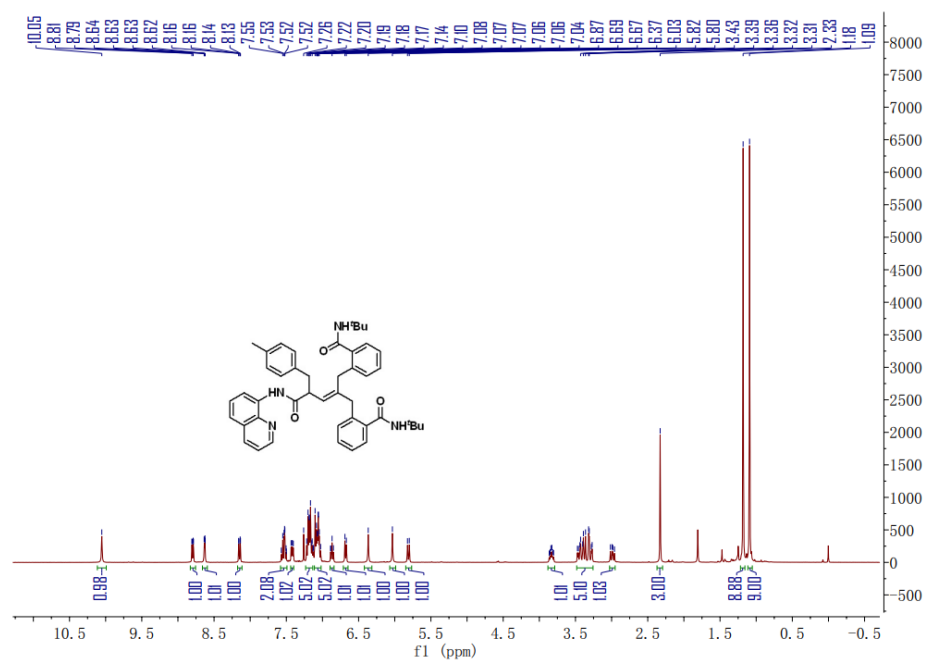

**Figure S59.** <sup>1</sup>H NMR (400 MHz, Chloroform-*d*) spectra of compound **4ah**

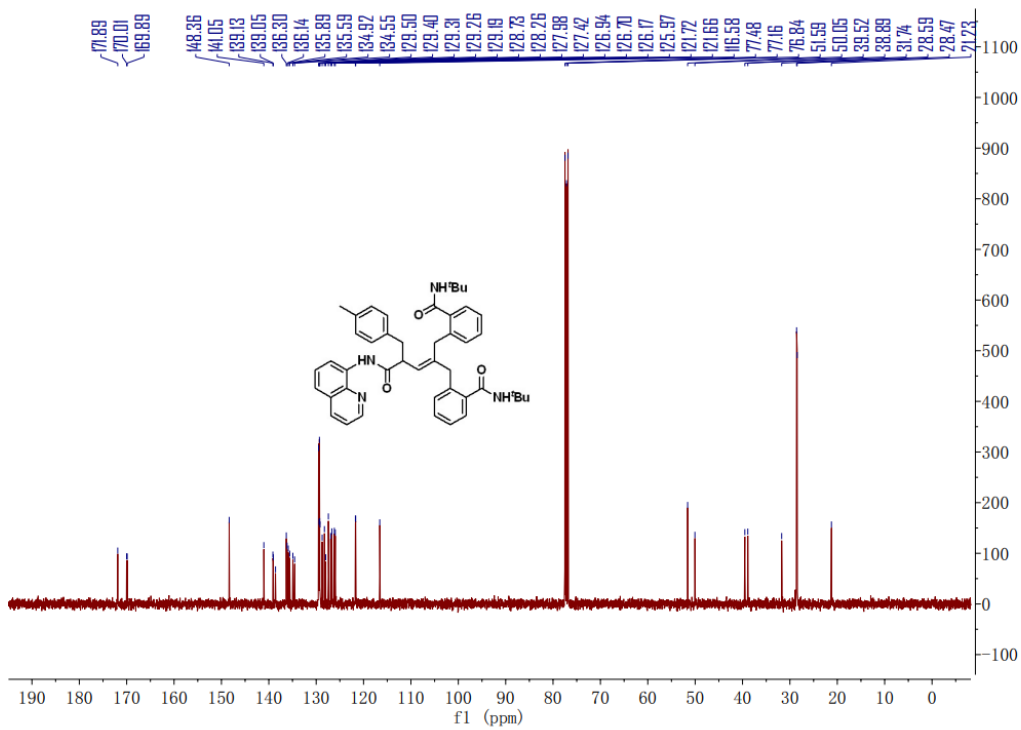

**Figure S60.** <sup>13</sup>C NMR (101 MHz, Chloroform-*d*) spectra of compound **4ah**

**(4ai) 2,2'-(2-(2-(4-chlorobenzyl)-3-oxo-3-(quinolin-8-ylamino)propylidene) propane-1,3-diyl)bis(*N*-*tert*-butyl)benzamide)**

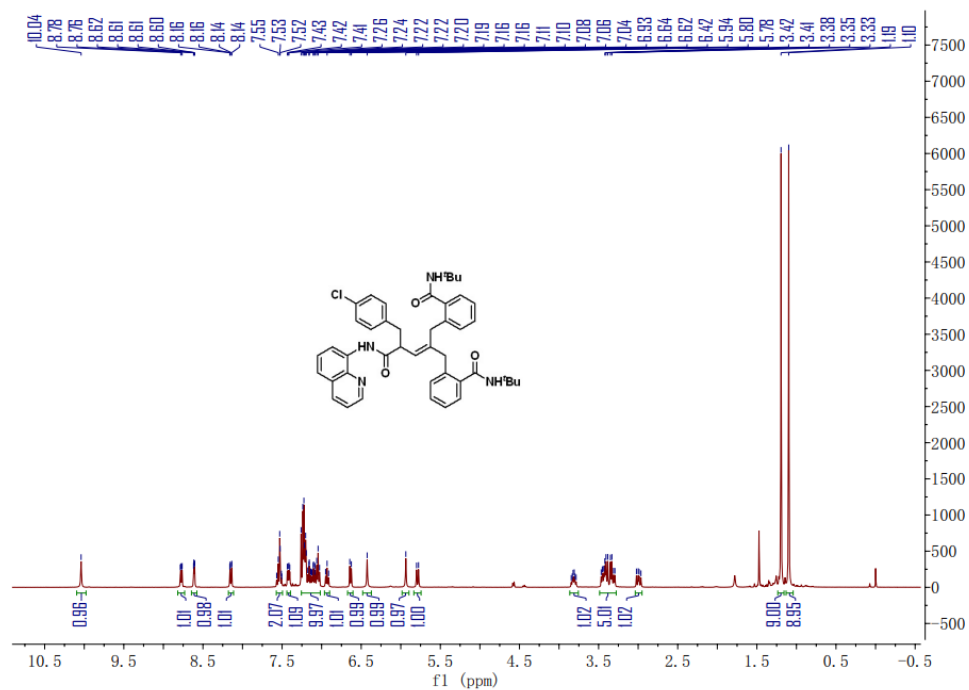

**Figure S61.**  $^1\text{H}$  NMR (400 MHz, Chloroform-*d*) spectra of compound **4ai**

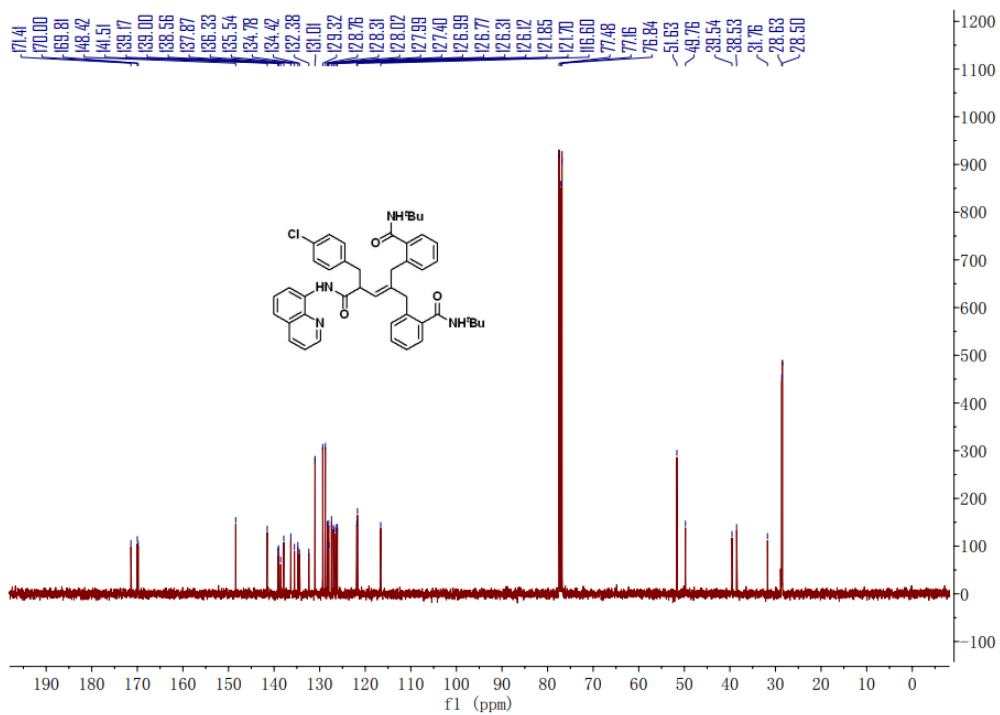

**Figure S62.**  $^{13}\text{C}$  NMR (101 MHz, Chloroform-*d*) spectra of compound **4ai**

**(5) (E)-2-(5-oxo-5-(quinolin-8-ylamino)pent-2-en-1-yl)benzamide.**

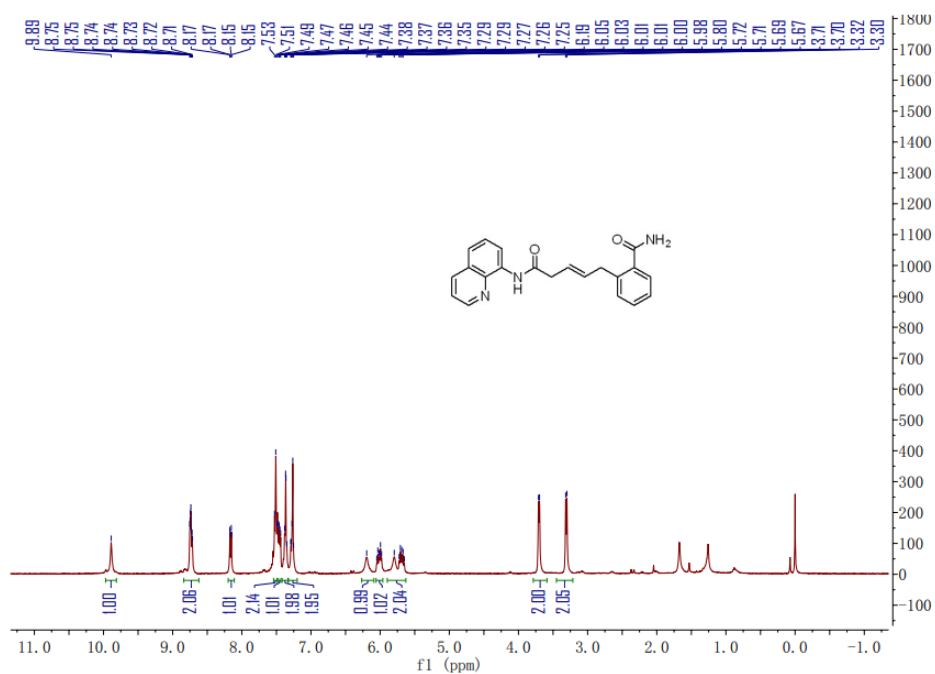

**Figure S63.**  $^1\text{H}$  NMR (400 MHz, Chloroform-*d*) spectra of compound **5**

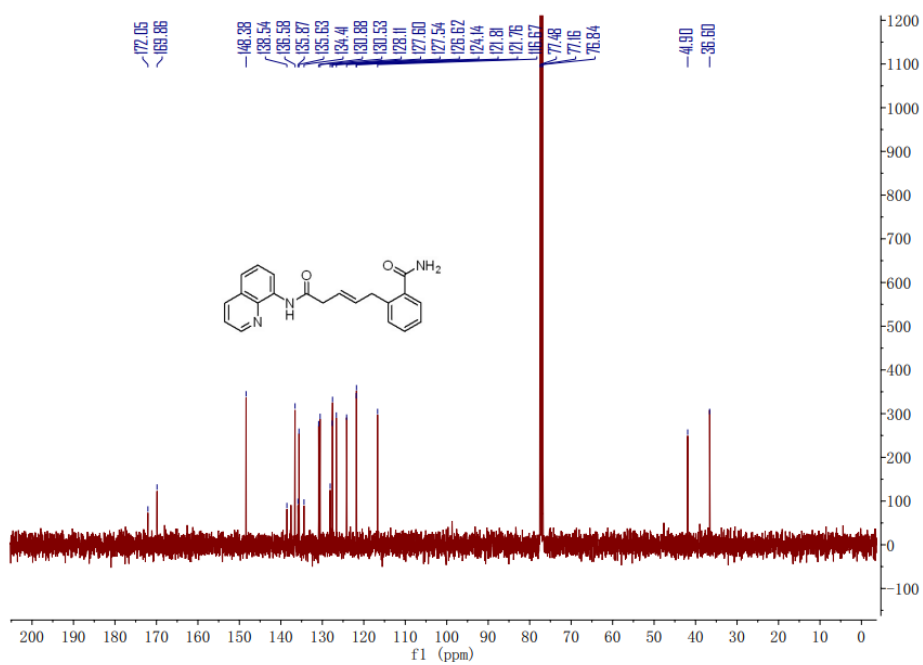

**Figure S64.**  $^{13}\text{C}$  NMR (101 MHz, Chloroform-*d*) spectra of compound **5**



(6) methyl(2E,4E)-5-(2-(tert-butylcarbamoyl)phenyl)penta-2,4-dienoate.

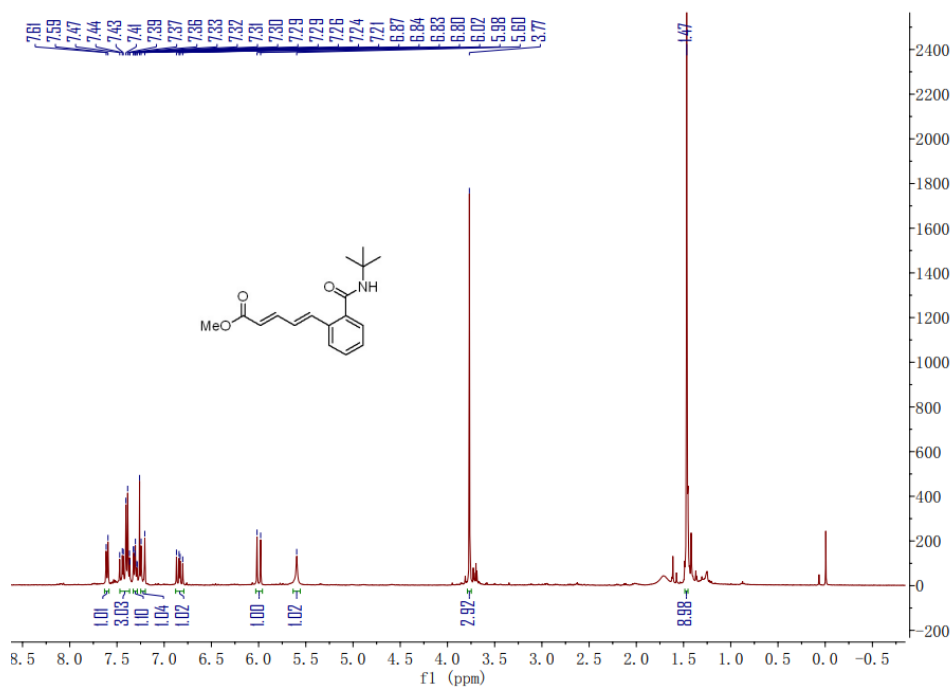

Figure S65. <sup>1</sup>H NMR (400 MHz, Chloroform-*d*) spectra of compound 6

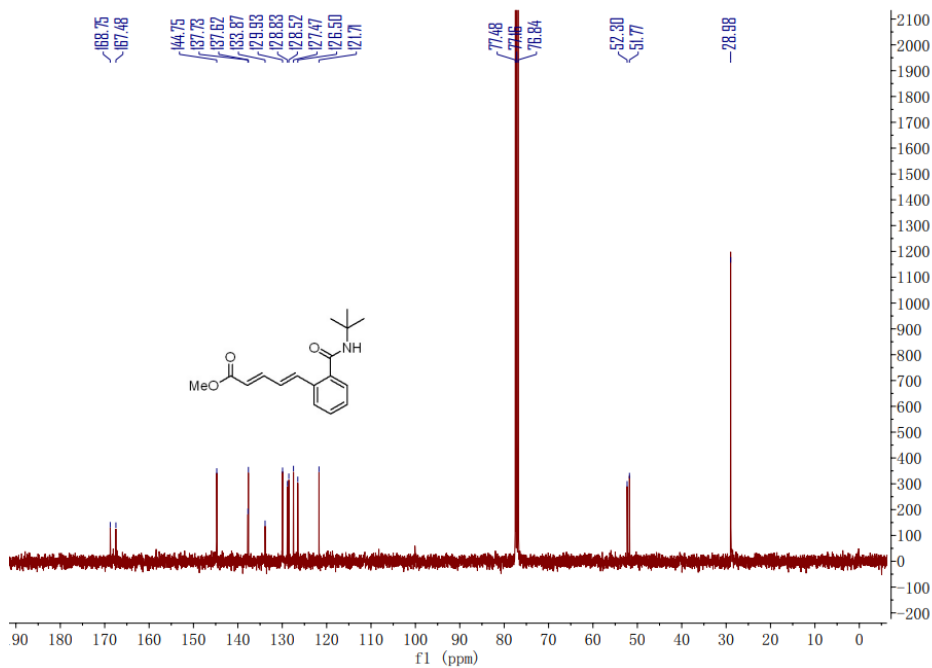

Figure S66. <sup>13</sup>C NMR (101 MHz, Chloroform-*d*) spectra of compound 6

**(7) *N*-(*tert*-butyl)-2-(2,3-dihydroxy-5-oxo-5-(quinolin-8-ylamino)pentyl)benzamide**

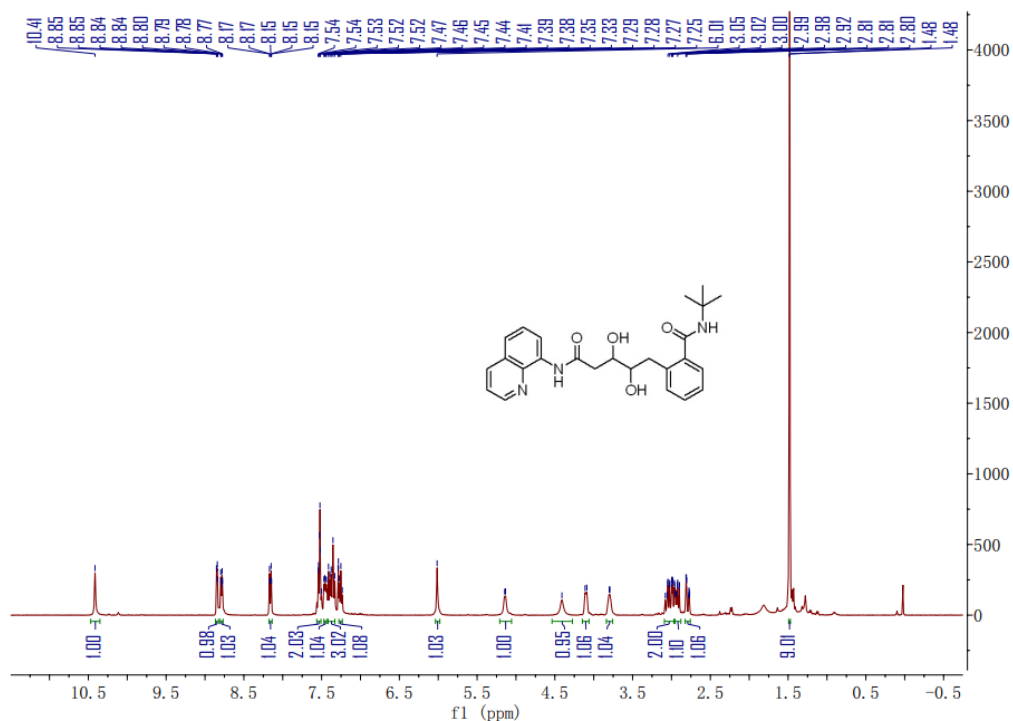

**Figure S67.**  $^1\text{H}$  NMR (400 MHz, Chloroform-*d*) spectra of compound **7**

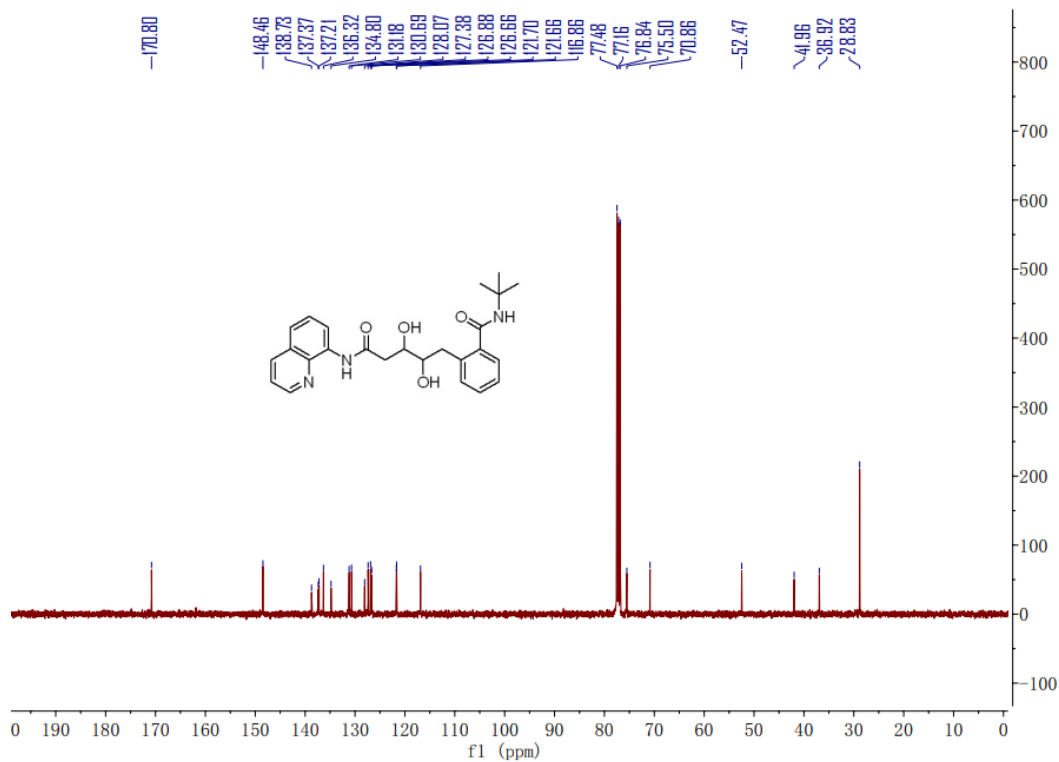

**Figure S68.**  $^{13}\text{C}$  NMR (101 MHz, Chloroform-*d*) spectra of compound **7**

**(8) 2-(2-(benzylamino)-5-oxo-5-(quinolin-8-ylamino)pentyl)-*N*-(tert-butyl) benzamide.**

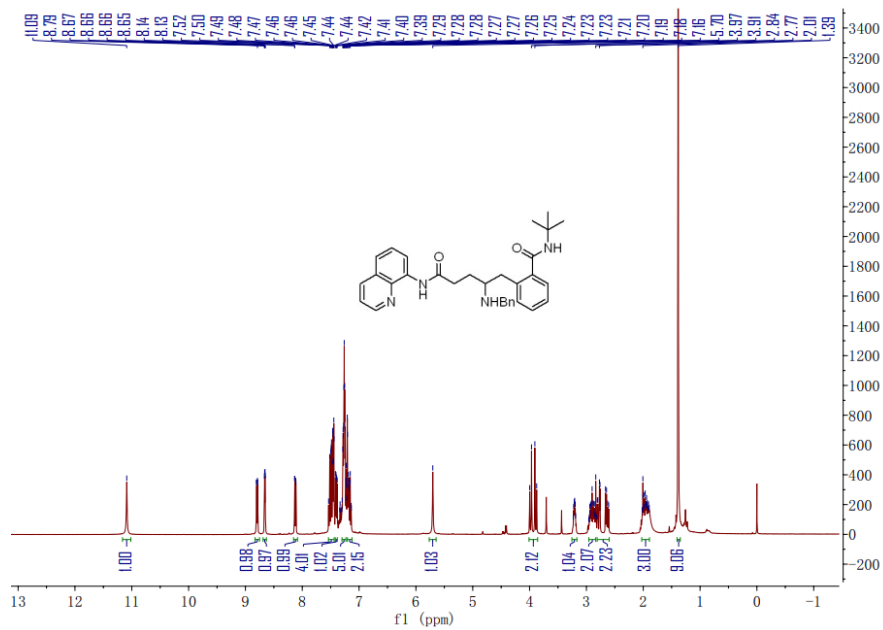

**Figure S69.**  $^1\text{H}$  NMR (400 MHz, Chloroform-*d*) spectra of compound **8**

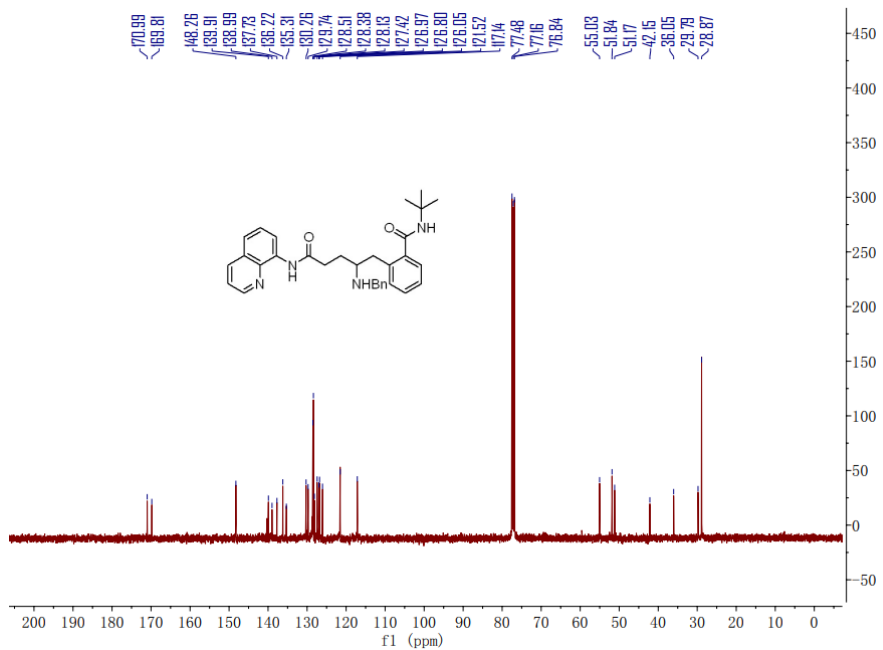

**Figure S70.**  $^{13}\text{C}$  NMR (101 MHz, Chloroform-*d*) spectra of compound **8**

**(9) *N*-(*tert*-butyl)-2-(5-oxo-2-phenyl-5-(quinolin-8-ylamino)pentyl)benzamide.**

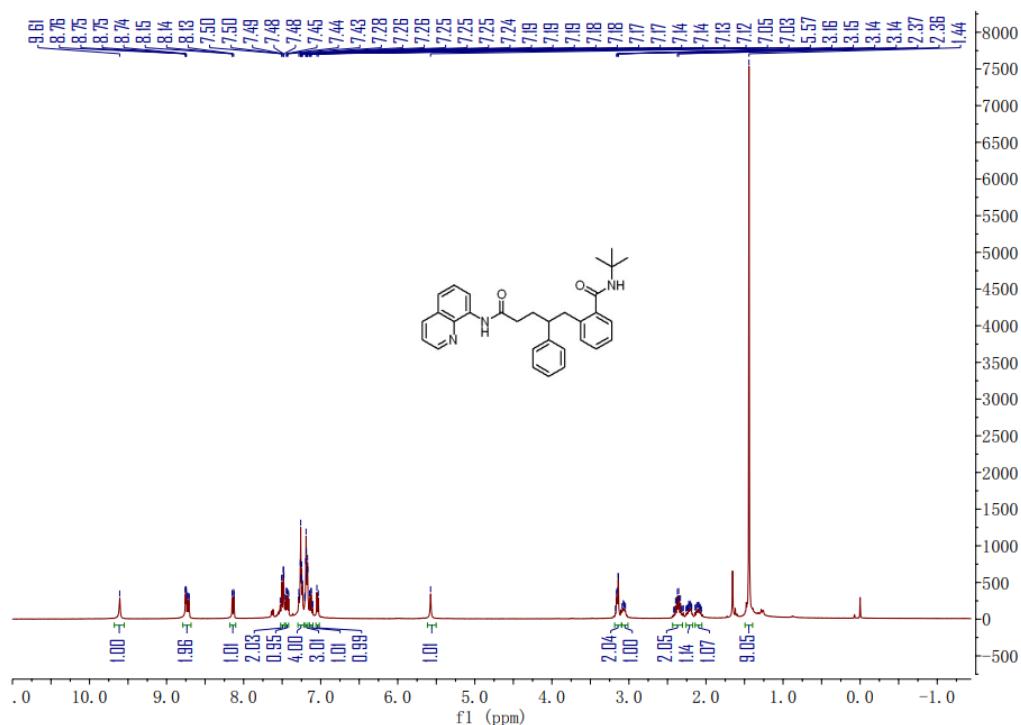

**Figure S71.**  $^1\text{H}$  NMR (400 MHz, Chloroform-*d*) spectra of compound 9

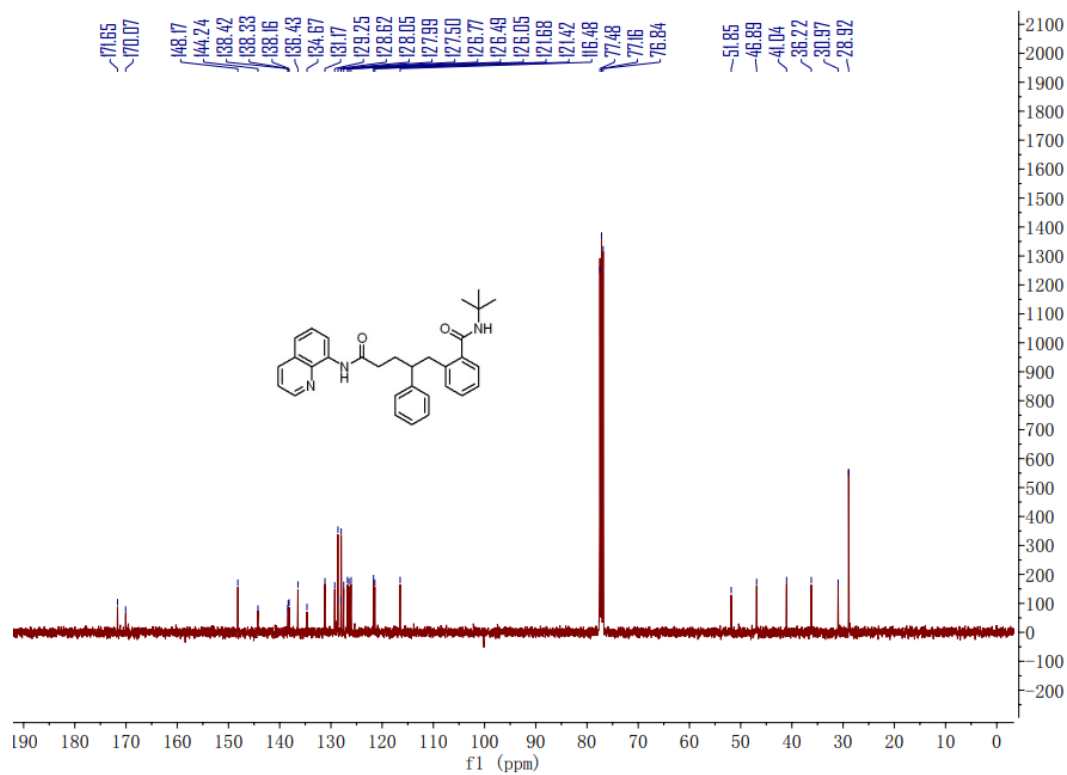

**Figure S72.**  $^{13}\text{C}$  NMR (101 MHz, Chloroform-*d*) spectra of compound 9

## V. The Oretical Calculation Data

### (1) Computational details

All the calculations were carried out by Gaussian 09 programs<sup>6</sup> using B3LYP-D3(BJ) functional<sup>7</sup> theory level. The optimized structures were obtained via the basis set 6-31G(d,p) for non-metallic atoms, SDD for Cu atom. The single point energy calculations were obtained via the basis set 6-311G(d,p)/SDD(Cu). And the SMD solvation model<sup>8</sup> was used to stimulate the solvation effect of the (MeCN/*i*PrOH=1:3, eps=23.37, epsinf=1.875055). Also, the geometry optimizations of molecule *i*PrOH, F<sup>-</sup>, H<sup>+</sup> were carried out under explicit solvation model. Vibrational frequency analyses were carried out to make sure that the reactants, and products have no imaginary frequencies while the transition states have only one imaginary frequency. The Gibbs free energies were obtained by the addition of thermal correction of free energy and single point energy of each calculated geometries. The GaussView (Version 6)<sup>9</sup> software was employed to present the optimized structures.

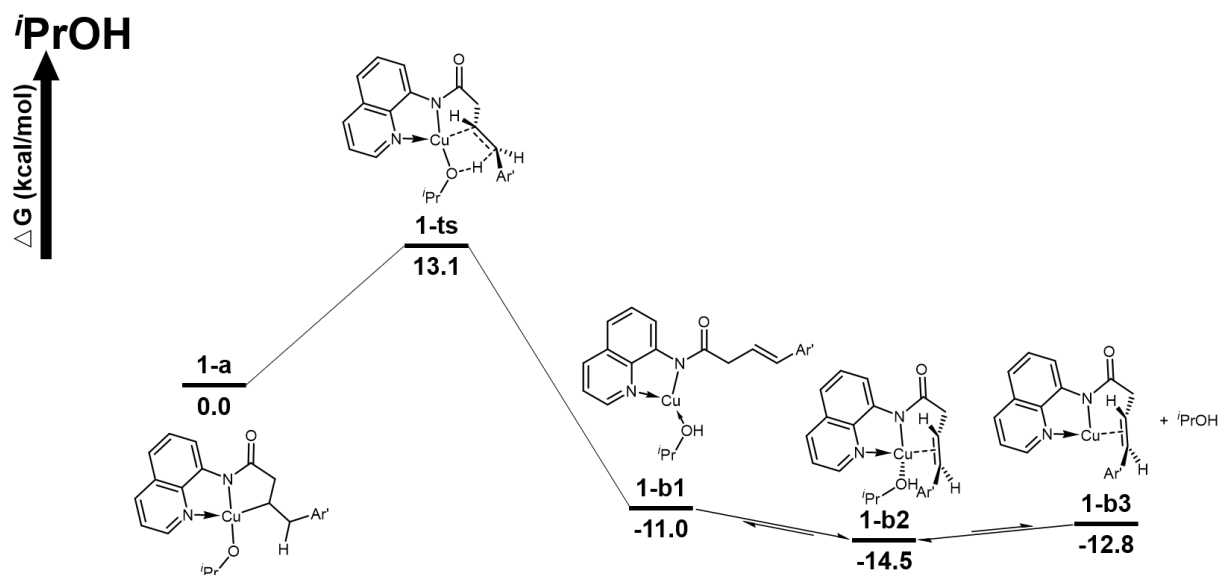

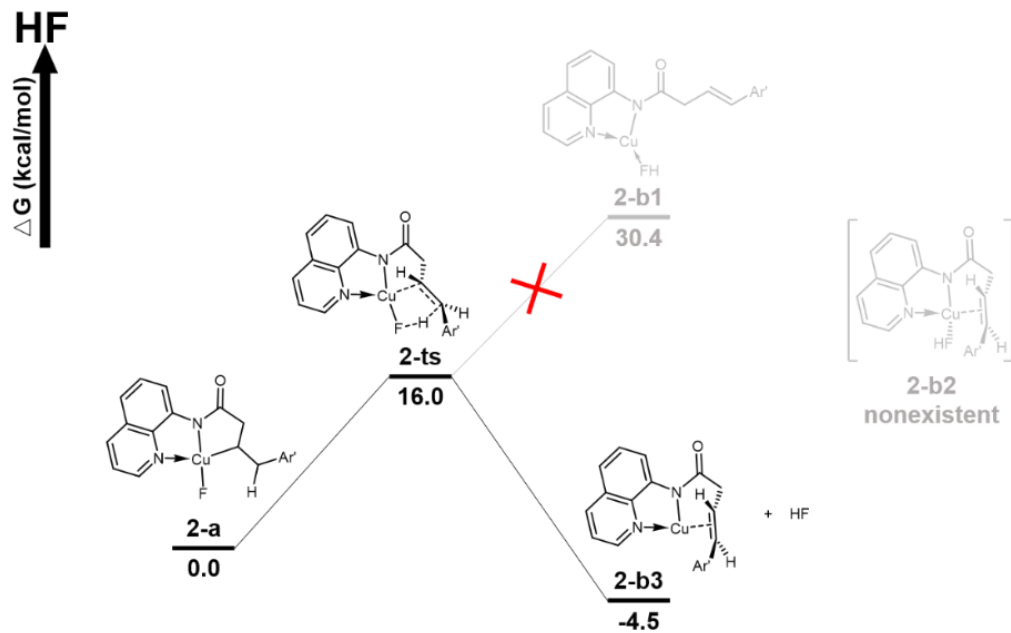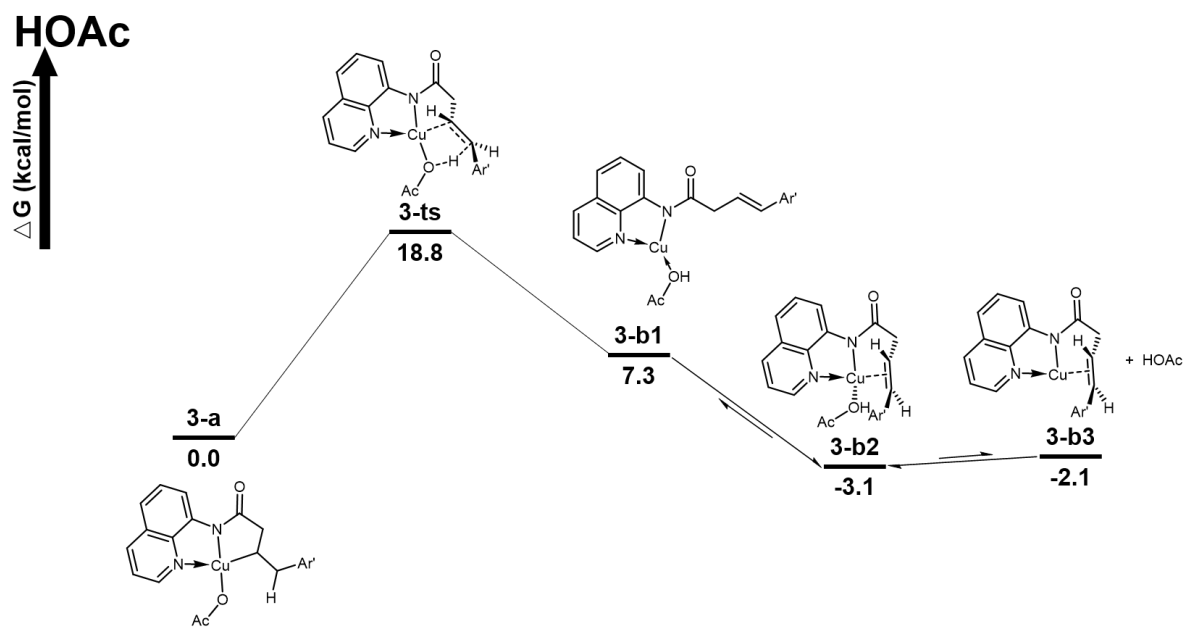

## (2) Cartesian Coordinates

3iPrOH

|   |            |             |             |
|---|------------|-------------|-------------|
| C | 0.15661253 | -0.10440835 | 0.00000000  |
| C | 1.35308353 | -0.87928335 | -0.54447000 |
| H | 1.82760453 | -1.43231135 | 0.28075100  |

|   |             |             |             |
|---|-------------|-------------|-------------|
| H | -0.56754547 | -0.78712535 | 0.45694800  |
| H | 0.47322853  | 0.61750665  | 0.76102900  |
| H | -0.34530447 | 0.44039565  | -0.80796500 |
| C | 2.39823653  | 0.01164365  | -1.19903700 |
| H | 3.24057653  | -0.59176635 | -1.55256200 |
| H | 1.96649053  | 0.54415065  | -2.05431800 |
| H | 2.77891853  | 0.75035665  | -0.48637300 |
| O | 0.91633553  | -1.82131235 | -1.54694300 |
| H | 2.36232253  | -2.80100135 | -1.88621800 |
| H | 0.30862553  | -2.46092335 | -1.10701400 |
| O | 3.18412153  | -3.32584935 | -1.75925600 |
| C | 2.88967653  | -4.28750835 | -0.73700500 |
| C | 4.21847853  | -4.86011735 | -0.26229600 |
| C | 1.94642453  | -5.36514435 | -1.27200500 |
| H | 2.39801253  | -3.78125635 | 0.11004100  |
| H | 4.86798153  | -4.06193435 | 0.11322500  |
| H | 4.06964853  | -5.59032235 | 0.54002200  |
| H | 4.73516353  | -5.35867635 | -1.09124800 |
| H | 1.01625353  | -4.91501235 | -1.63373900 |
| H | 2.41328153  | -5.90084435 | -2.10692300 |
| H | 1.69162753  | -6.09363935 | -0.49327400 |

|   |             |             |             |
|---|-------------|-------------|-------------|
| O | -0.84648547 | -3.47426935 | -0.28712600 |
| C | -1.91896947 | -3.89672335 | -1.16733000 |
| C | -2.41704647 | -2.64157135 | -1.86853900 |
| C | -3.00196147 | -4.60318135 | -0.36205600 |
| H | -1.50747047 | -4.59022935 | -1.91467100 |
| H | -1.60238247 | -2.14788835 | -2.40701700 |
| H | -3.20351247 | -2.89646135 | -2.58564600 |
| H | -2.82955147 | -1.93287135 | -1.14153100 |
| H | -2.59776047 | -5.48702135 | 0.14463200  |
| H | -3.41633747 | -3.92956635 | 0.39644700  |
| H | -3.81621847 | -4.93341535 | -1.01608900 |
| H | -0.44651947 | -4.25916135 | 0.11688100  |

2iPrOH+HOAc

|   |             |             |             |
|---|-------------|-------------|-------------|
| C | -0.14501160 | 0.16241299  | 0.00000000  |
| C | -1.40310660 | 0.65801799  | -0.69927500 |
| H | -2.00846860 | 1.23189699  | 0.02157800  |
| H | 0.44266040  | 1.00624399  | 0.37753200  |
| H | -0.39741560 | -0.48812201 | 0.84391900  |
| H | 0.48046040  | -0.40584801 | -0.69873700 |
| C | -2.25482560 | -0.48200601 | -1.25658300 |
| H | -3.12592660 | -0.08491901 | -1.78897800 |



|   |             |             |             |
|---|-------------|-------------|-------------|
| H | -1.67053260 | -1.08636601 | -1.96075600 |
| H | -2.61536560 | -1.13628401 | -0.45425500 |
| O | -0.97562760 | 1.53069599  | -1.75816100 |
| H | -1.78805160 | 1.94365299  | -2.11029900 |
| O | -3.54180460 | 2.61097599  | -2.00784900 |
| C | -3.70053560 | 3.44208999  | -1.11105600 |
| O | -4.89645060 | 3.72036799  | -0.60142000 |
| H | -5.57978560 | 3.11744199  | -1.03487400 |
| C | -2.59032460 | 4.24647599  | -0.50047900 |
| H | -1.62430360 | 3.83862599  | -0.79757700 |
| H | -2.67221060 | 5.28340599  | -0.84547400 |
| H | -2.68710360 | 4.25209799  | 0.58875100  |
| O | -6.41610760 | 1.86968399  | -1.68545300 |
| H | -5.84579360 | 1.74367199  | -2.46233900 |
| C | -6.20485360 | 0.74039399  | -0.79142300 |
| C | -6.65586060 | -0.54487801 | -1.47085600 |
| C | -6.97585660 | 1.05655999  | 0.47921500  |
| H | -5.13225860 | 0.67951199  | -0.56195400 |
| H | -6.10423860 | -0.70818301 | -2.40361300 |
| H | -6.47660060 | -1.40608501 | -0.81837200 |
| H | -7.72542560 | -0.50151801 | -1.70525900 |

|   |             |            |            |
|---|-------------|------------|------------|
| H | -6.60759060 | 1.98292799 | 0.93225300 |
| H | -8.04302860 | 1.17578799 | 0.26053200 |
| H | -6.85901360 | 0.24746999 | 1.20681700 |

3iPrOH+HF

|   |             |             |             |
|---|-------------|-------------|-------------|
| C | -0.42923434 | 0.33642691  | 0.00000000  |
| C | -1.16526034 | 0.27535591  | -1.32931400 |
| H | -1.57226034 | -0.73826809 | -1.47140100 |
| H | -1.11111634 | 0.11590691  | 0.82842700  |
| H | 0.38686166  | -0.39263809 | 0.02351000  |
| H | -0.00855434 | 1.33623091  | 0.15788700  |
| C | -0.28019834 | 0.62644591  | -2.52063200 |
| H | -0.85825634 | 0.58045991  | -3.45092500 |
| H | 0.12138866  | 1.64077291  | -2.41351500 |
| H | 0.55771766  | -0.07376109 | -2.60725400 |
| O | -2.26444634 | 1.20702291  | -1.23257300 |
| H | -2.68477934 | 1.24632091  | -2.10876700 |
| F | -3.76164334 | 0.57520691  | -3.52318700 |
| H | -4.01400334 | -0.07174209 | -2.78883400 |
| O | -4.32717034 | -0.77107109 | -1.59281400 |
| C | -5.77307634 | -0.86501509 | -1.38300200 |
| C | -6.04453434 | -1.37634609 | 0.02161800  |

|   |             |             |             |
|---|-------------|-------------|-------------|
| C | -6.29003834 | -1.77841209 | -2.48017600 |
| H | -6.19378234 | 0.13828891  | -1.51406900 |
| H | -5.62941334 | -0.69519409 | 0.77300600  |
| H | -7.12343934 | -1.44870309 | 0.19359200  |
| H | -5.60076534 | -2.36752709 | 0.16563600  |
| H | -6.03335434 | -1.37518209 | -3.46540900 |
| H | -5.85587834 | -2.77993809 | -2.38802800 |
| H | -7.37932434 | -1.86232509 | -2.41787900 |
| H | -3.92753234 | -0.18723609 | -0.92044600 |
| H | -5.01919834 | 1.80566691  | -2.98508100 |
| O | -5.69944934 | 2.33215591  | -2.52785800 |
| C | -5.10133634 | 2.89136791  | -1.34569300 |
| C | -6.23509134 | 3.48228591  | -0.51877400 |
| C | -4.04569134 | 3.93171391  | -1.71589000 |
| H | -4.61983634 | 2.08963691  | -0.76738500 |
| H | -6.97001234 | 2.71189091  | -0.26173800 |
| H | -5.85298734 | 3.91629891  | 0.41087000  |
| H | -6.74860334 | 4.27060691  | -1.08170600 |
| H | -3.25193534 | 3.48758291  | -2.32515000 |
| H | -4.50205934 | 4.74890391  | -2.28660800 |
| H | -3.57916134 | 4.35313191  | -0.81823400 |

1-a

|   |             |             |             |
|---|-------------|-------------|-------------|
| C | 0.00580046  | 0.83526681  | 0.00000000  |
| C | -0.58702954 | -1.33605619 | -0.60498400 |
| C | -1.97261054 | -1.01685219 | -0.60110300 |
| C | -2.32658654 | 0.31603181  | -0.26850800 |
| C | -1.34572454 | 1.23568881  | 0.03800600  |
| H | 0.81079846  | 1.52327581  | 0.23787500  |
| C | -0.11927554 | -2.65676319 | -0.89564600 |
| C | -2.90714554 | -2.03627419 | -0.92036300 |
| H | -3.37625054 | 0.59729081  | -0.25379400 |
| H | -1.59187754 | 2.25795681  | 0.30447300  |
| C | -2.44673054 | -3.30170319 | -1.21442200 |
| C | -1.06794654 | -3.62663119 | -1.20312000 |
| H | -3.96809954 | -1.80477719 | -0.92729500 |
| H | -3.15515554 | -4.08798119 | -1.46117400 |
| H | -0.75165654 | -4.63446319 | -1.42991000 |
| N | 0.36495646  | -0.39834819 | -0.31831200 |
| N | 1.27189946  | -2.80042719 | -0.80746200 |
| C | 1.95638746  | -3.96104919 | -1.02198800 |
| O | 1.46519146  | -5.04610419 | -1.36448200 |
| C | 3.43040946  | -3.78562019 | -0.71904500 |

|    |             |             |             |
|----|-------------|-------------|-------------|
| H  | 3.58592546  | -4.17803819 | 0.29511000  |
| H  | 4.01694446  | -4.41710119 | -1.39688700 |
| C  | 3.87782646  | -2.33306719 | -0.79329300 |
| H  | 4.10975346  | -2.02621419 | -1.81688600 |
| Cu | 2.24795746  | -1.20632619 | -0.52401000 |
| C  | 4.95533146  | -1.93537619 | 0.18566200  |
| H  | 5.14469646  | -0.86584919 | 0.11632700  |
| H  | 4.63821046  | -2.15825819 | 1.21218500  |
| C  | 6.28003646  | -2.69404119 | -0.11106700 |
| H  | 6.15109546  | -3.76431319 | 0.08490600  |
| H  | 6.51139946  | -2.59179219 | -1.17725000 |
| C  | 7.41021146  | -2.14869519 | 0.73078300  |
| C  | 8.21200146  | -1.08196819 | 0.27920700  |
| C  | 7.65252746  | -2.66580919 | 2.01035200  |
| C  | 9.19731446  | -0.53371419 | 1.10863800  |
| C  | 8.64527646  | -2.12985619 | 2.83300200  |
| H  | 7.04879946  | -3.49875619 | 2.36410600  |
| C  | 9.41632646  | -1.05510019 | 2.38498600  |
| H  | 9.79215946  | 0.30301581  | 0.75270200  |
| H  | 8.81302946  | -2.54839919 | 3.82218900  |
| H  | 10.18449646 | -0.62456119 | 3.02186700  |

|   |             |             |             |
|---|-------------|-------------|-------------|
| C | 7.92296046  | -0.43261519 | -1.04737500 |
| O | 6.97431146  | 0.37377881  | -1.12605100 |
| N | 8.68422846  | -0.69604419 | -2.13154300 |
| H | 8.37058246  | -0.16986119 | -2.94259300 |
| C | 9.77216946  | -1.68260619 | -2.40320800 |
| C | 11.04638046 | -1.34634119 | -1.61181400 |
| C | 9.31198046  | -3.11702119 | -2.09826500 |
| C | 10.06220346 | -1.55210119 | -3.90766800 |
| H | 11.34772246 | -0.30610019 | -1.77864400 |
| H | 10.90890646 | -1.50088719 | -0.53905700 |
| H | 11.86491646 | -1.99713719 | -1.94087800 |
| H | 8.40290946  | -3.36397119 | -2.65736100 |
| H | 10.09686946 | -3.82270919 | -2.39405100 |
| H | 9.11716646  | -3.26372819 | -1.03281000 |
| H | 10.85529946 | -2.24925819 | -4.19590700 |
| H | 9.17180046  | -1.78521319 | -4.50440700 |
| H | 10.39390646 | -0.53737019 | -4.16040200 |
| O | 3.21219646  | 0.34696281  | -0.30335800 |
| C | 3.21697746  | 1.27008081  | -1.37990600 |
| C | 3.81124946  | 0.68161781  | -2.66478500 |
| C | 4.01093646  | 2.49308681  | -0.90891900 |

|   |            |             |             |
|---|------------|-------------|-------------|
| H | 2.18489046 | 1.59446481  | -1.61020200 |
| H | 3.22213446 | -0.18071019 | -2.99807900 |
| H | 3.80306046 | 1.42586581  | -3.47033100 |
| H | 4.84527246 | 0.35901781  | -2.50205100 |
| H | 3.56779546 | 2.91055081  | 0.00212500  |
| H | 5.04430846 | 2.20302581  | -0.68632300 |
| H | 4.02258246 | 3.27626581  | -1.67609100 |

1-ts

Value of imaginary frequency = -1007.03 cm-1

|   |            |             |             |
|---|------------|-------------|-------------|
| C | 2.48484848 | 1.38787877  | 0.00000000  |
| C | 3.28415448 | 3.56759577  | 0.19910700  |
| C | 4.62782148 | 3.13794377  | -0.01070400 |
| C | 4.84554648 | 1.75188477  | -0.22133500 |
| C | 3.78110148 | 0.87782377  | -0.21862000 |
| H | 1.62150748 | 0.72801777  | 0.00768500  |
| C | 2.97638348 | 4.95918177  | 0.41575000  |
| C | 5.67409748 | 4.09667677  | -0.00220800 |
| H | 5.85906648 | 1.39460077  | -0.38402900 |
| H | 3.91916348 | -0.18611123 | -0.38009400 |
| C | 5.36772248 | 5.42306077  | 0.20827500  |
| C | 4.03894548 | 5.86085777  | 0.41530000  |

|    |             |            |             |
|----|-------------|------------|-------------|
| H  | 6.69761348  | 3.77039177 | -0.16318900 |
| H  | 6.16134848  | 6.16593477 | 0.21565100  |
| H  | 3.84086248  | 6.91020977 | 0.57872600  |
| N  | 2.24526948  | 2.67509377 | 0.20202400  |
| N  | 1.62164548  | 5.24451077 | 0.60089200  |
| C  | 1.12615448  | 6.45410177 | 0.96513400  |
| O  | 1.76943248  | 7.50244077 | 1.16371600  |
| C  | -0.38324952 | 6.42482477 | 1.19143400  |
| H  | -0.56074052 | 6.19830977 | 2.25116200  |
| H  | -0.78299452 | 7.43520177 | 1.01964600  |
| C  | -1.12752352 | 5.45237077 | 0.32089500  |
| H  | -0.89999552 | 5.51040577 | -0.74548200 |
| Cu | 0.44137348  | 3.73507877 | 0.49655000  |
| C  | -2.37027552 | 4.86602277 | 0.69703000  |
| H  | -1.96777852 | 3.69658777 | 0.89248300  |
| H  | -2.73709452 | 5.17565377 | 1.67915100  |
| C  | -3.48026152 | 4.67523877 | -0.36466800 |
| H  | -3.11752752 | 5.00612077 | -1.34449900 |
| H  | -3.72538052 | 3.61266677 | -0.46848600 |
| C  | -4.72456752 | 5.45128677 | 0.00669700  |
| C  | -5.71381052 | 4.88065977 | 0.83239000  |



|   |             |            |             |
|---|-------------|------------|-------------|
| C | -4.89924552 | 6.77252877 | -0.42427500 |
| C | -6.82348652 | 5.63341777 | 1.23474900  |
| C | -6.01242552 | 7.51982077 | -0.03440200 |
| H | -4.14702752 | 7.21929077 | -1.07077700 |
| C | -6.97503752 | 6.95256577 | 0.80376400  |
| H | -7.56509952 | 5.18614477 | 1.89055400  |
| H | -6.12520352 | 8.54397577 | -0.38123700 |
| H | -7.83915352 | 7.53070777 | 1.12025200  |
| C | -5.50337052 | 3.50698877 | 1.40871100  |
| O | -4.65934552 | 3.36283477 | 2.31606900  |
| N | -6.23340052 | 2.45222277 | 0.98265200  |
| H | -5.98732052 | 1.60594577 | 1.48894600  |
| C | -7.09344252 | 2.23238577 | -0.21904600 |
| C | -8.42101652 | 2.99989477 | -0.11455300 |
| C | -6.34923652 | 2.61727977 | -1.50770800 |
| C | -7.37933152 | 0.72172377 | -0.23086000 |
| H | -8.92358452 | 2.78764077 | 0.83591400  |
| H | -8.27226952 | 4.07919977 | -0.19600000 |
| H | -9.08642252 | 2.69264077 | -0.92976700 |
| H | -5.40871252 | 2.06220777 | -1.59575800 |
| H | -6.97193052 | 2.37591677 | -2.37715000 |

|   |             |             |             |
|---|-------------|-------------|-------------|
| H | -6.12821452 | 3.68724877  | -1.54355300 |
| H | -8.00803852 | 0.46686277  | -1.08942900 |
| H | -6.44920752 | 0.14602877  | -0.30916500 |
| H | -7.90551052 | 0.41105677  | 0.67935000  |
| O | -1.09598552 | 2.64211777  | 0.73010100  |
| C | -1.08614452 | 1.56518077  | 1.66989100  |
| C | -2.34309652 | 0.71944177  | 1.47127100  |
| C | -0.97344652 | 2.10868377  | 3.09496200  |
| H | -0.20028252 | 0.94750477  | 1.45399800  |
| H | -2.41508652 | 0.37449477  | 0.43387200  |
| H | -2.33485652 | -0.16009923 | 2.12521400  |
| H | -3.23448352 | 1.31297677  | 1.70396300  |
| H | -0.07453252 | 2.72959077  | 3.19031600  |
| H | -1.84708752 | 2.72718977  | 3.33281100  |
| H | -0.91450552 | 1.29893577  | 3.83151600  |

1-b1

|   |             |             |             |
|---|-------------|-------------|-------------|
| C | -0.41818181 | -0.32121212 | 0.00000000  |
| C | 0.67165419  | -2.30596012 | 0.54391900  |
| C | -0.53592081 | -3.05311912 | 0.37040100  |
| C | -1.70328881 | -2.34099012 | -0.00899900 |
| C | -1.64984681 | -0.97891312 | -0.19776400 |

|    |             |             |             |
|----|-------------|-------------|-------------|
| H  | -0.34121381 | 0.75407488  | -0.13933100 |
| C  | 1.90541219  | -2.96754012 | 0.92300000  |
| C  | -0.53557281 | -4.45553212 | 0.57918400  |
| H  | -2.63294981 | -2.88764812 | -0.14648800 |
| H  | -2.52621081 | -0.40873512 | -0.48904600 |
| C  | 0.63756619  | -5.07220912 | 0.95148200  |
| C  | 1.83961919  | -4.35015312 | 1.12092700  |
| H  | -1.45616881 | -5.01637112 | 0.44420300  |
| H  | 0.65384919  | -6.14611012 | 1.12176000  |
| H  | 2.73445719  | -4.88071512 | 1.40847400  |
| N  | 0.69091419  | -0.95162612 | 0.35720700  |
| N  | 3.02892819  | -2.14962712 | 1.07412000  |
| C  | 4.28106519  | -2.64186912 | 1.25355100  |
| O  | 4.62091819  | -3.84520312 | 1.29488000  |
| C  | 5.36560419  | -1.56390612 | 1.40529600  |
| H  | 5.38773019  | -0.95669012 | 0.49188500  |
| H  | 5.04517419  | -0.88278112 | 2.20783600  |
| C  | 6.72695519  | -2.12006712 | 1.70792900  |
| H  | 6.78453719  | -2.81723012 | 2.54445900  |
| Cu | 2.68433519  | -0.21802912 | 0.85042800  |
| C  | 7.83753719  | -1.79928312 | 1.03961000  |

|   |             |             |             |
|---|-------------|-------------|-------------|
| H | 7.78717719  | -1.10379912 | 0.20127700  |
| C | 9.22329019  | -2.29816112 | 1.37531000  |
| H | 9.16965119  | -3.04068712 | 2.18015900  |
| H | 9.65431119  | -2.80431812 | 0.50205800  |
| C | 10.12383319 | -1.14988412 | 1.80395100  |
| C | 10.93192319 | -0.45640312 | 0.88383300  |
| C | 10.12863419 | -0.73069712 | 3.14087300  |
| C | 11.69033819 | 0.64674688  | 1.29592400  |
| C | 10.89841419 | 0.35677788  | 3.55679000  |
| H | 9.51284819  | -1.26427112 | 3.86166400  |
| C | 11.67641319 | 1.05510788  | 2.63018400  |
| H | 12.28683419 | 1.18778688  | 0.56665200  |
| H | 10.88618119 | 0.66093388  | 4.60043600  |
| H | 12.26896319 | 1.91123488  | 2.94153600  |
| C | 10.87164619 | -0.80305912 | -0.57815100 |
| O | 9.86230019  | -0.47270912 | -1.23109500 |
| N | 11.90285419 | -1.43265112 | -1.18557800 |
| H | 11.71606719 | -1.57774612 | -2.17393400 |
| C | 13.10754819 | -2.14731212 | -0.66588800 |
| C | 14.15659319 | -1.16289612 | -0.12429400 |
| C | 12.72222419 | -3.17048612 | 0.41471300  |

|   |             |             |             |
|---|-------------|-------------|-------------|
| C | 13.68841419 | -2.88669612 | -1.88332600 |
| H | 14.38922719 | -0.39021512 | -0.86568200 |
| H | 13.81789719 | -0.67519012 | 0.79271500  |
| H | 15.08164319 | -1.70306912 | 0.10848300  |
| H | 11.97420919 | -3.87613712 | 0.03677500  |
| H | 13.60986619 | -3.74033712 | 0.71280900  |
| H | 12.32246719 | -2.68527612 | 1.30895000  |
| H | 14.58411519 | -3.44382312 | -1.59061800 |
| H | 12.96485219 | -3.60089112 | -2.29554700 |
| H | 13.97119419 | -2.18294312 | -2.67601100 |
| O | 3.05305719  | 1.73257988  | 0.86639800  |
| H | 3.93261019  | 1.93515488  | 0.50800100  |
| C | 2.07245819  | 2.62967588  | 0.25418700  |
| C | 1.96961719  | 2.35339188  | -1.23767800 |
| C | 2.44251819  | 4.06671788  | 0.58662200  |
| H | 1.13833519  | 2.35539888  | 0.75318200  |
| H | 1.74361819  | 1.29749188  | -1.41638100 |
| H | 1.17505219  | 2.96019188  | -1.68451500 |
| H | 2.91217219  | 2.59870488  | -1.74166100 |
| H | 2.52336519  | 4.20570888  | 1.66938700  |
| H | 3.40070619  | 4.33585988  | 0.12579200  |

H 1.67907419 4.75311888 0.20593000

1-b2

C -0.37122970 0.26682134 0.00000000

C 0.92048230 1.79153734 1.17981200

C 2.11511530 1.06020434 0.89517800

C 1.98930030 -0.13091466 0.13390600

C 0.74993030 -0.53289466 -0.31048100

H -1.36076870 -0.02026166 -0.34929700

C 0.97565330 3.00286034 1.97145400

C 3.36281730 1.53941534 1.37441100

H 2.87963030 -0.71330466 -0.09008200

H 0.62120230 -1.43891966 -0.89413700

C 3.40183930 2.70587534 2.10759600

C 2.22863730 3.43476634 2.40686700

H 4.26743530 0.97886634 1.15507800

H 4.35411130 3.07902734 2.47697800

H 2.29592430 4.34356834 2.99020000

N -0.29816270 1.38201034 0.71053500

N -0.24928470 3.59464634 2.22510600

C -0.42605470 4.89497234 2.52114700

O 0.44570230 5.77158834 2.72516600

|    |             |            |             |
|----|-------------|------------|-------------|
| C  | -1.92029070 | 5.27385334 | 2.59123800  |
| H  | -2.27684670 | 5.06083434 | 3.60753200  |
| H  | -1.99932570 | 6.35563934 | 2.43459200  |
| C  | -2.75904070 | 4.52188234 | 1.58271300  |
| H  | -2.57799070 | 4.77519334 | 0.53588800  |
| Cu | -1.98071470 | 2.54892634 | 1.79067000  |
| C  | -3.80859070 | 3.69536934 | 1.89095700  |
| H  | -4.10772670 | 3.58636534 | 2.93315400  |
| C  | -4.78183970 | 3.12960834 | 0.87356900  |
| H  | -4.38136070 | 3.27394234 | -0.13629000 |
| H  | -4.87526870 | 2.04898334 | 1.02540800  |
| C  | -6.15333670 | 3.77349434 | 0.98327700  |
| C  | -7.12696470 | 3.27429534 | 1.86984500  |
| C  | -6.46577670 | 4.90379534 | 0.21766900  |
| C  | -8.36231070 | 3.91937834 | 2.00283400  |
| C  | -7.70456070 | 5.53681234 | 0.33557600  |
| H  | -5.72377570 | 5.29113134 | -0.47721200 |
| C  | -8.65505070 | 5.04707134 | 1.23416000  |
| H  | -9.09275070 | 3.53640934 | 2.71040700  |
| H  | -7.92516070 | 6.41175234 | -0.27072900 |
| H  | -9.61788170 | 5.53996334 | 1.33931500  |

|   |             |             |             |
|---|-------------|-------------|-------------|
| C | -6.78322170 | 2.14419634  | 2.80235400  |
| O | -6.13522370 | 2.40967934  | 3.83528500  |
| N | -7.16217770 | 0.87420034  | 2.54514700  |
| H | -6.85262870 | 0.23687534  | 3.27417900  |
| C | -7.87359370 | 0.23012834  | 1.40189400  |
| C | -9.32550170 | 0.72459034  | 1.29872900  |
| C | -7.12857370 | 0.46602734  | 0.07920000  |
| C | -7.87049370 | -1.27315366 | 1.72365600  |
| H | -9.84161970 | 0.62177034  | 2.26005400  |
| H | -9.37481170 | 1.77050434  | 0.98665000  |
| H | -9.86465270 | 0.12786734  | 0.55396100  |
| H | -6.09934070 | 0.09481834  | 0.13832900  |
| H | -7.63812470 | -0.07287266 | -0.72785200 |
| H | -7.10458970 | 1.52501634  | -0.19023400 |
| H | -8.37210970 | -1.82583966 | 0.92296500  |
| H | -6.84692170 | -1.65823966 | 1.81008900  |
| H | -8.39924970 | -1.47962466 | 2.66215400  |
| O | -2.75445470 | 0.62078134  | 2.38134000  |
| C | -3.31849970 | 0.49390934  | 3.71991700  |
| C | -2.17013070 | 0.72796134  | 4.68514200  |
| C | -3.97484170 | -0.87135066 | 3.87088600  |



|   |             |             |            |
|---|-------------|-------------|------------|
| H | -4.07347870 | 1.27707834  | 3.84829500 |
| H | -1.71786070 | 1.70998534  | 4.50769900 |
| H | -2.52945870 | 0.69618634  | 5.71853800 |
| H | -1.39584970 | -0.03798466 | 4.56056600 |
| H | -4.75916970 | -1.01205766 | 3.11815300 |
| H | -3.23824770 | -1.67504066 | 3.75836300 |
| H | -4.44010970 | -0.96157766 | 4.85837500 |
| H | -3.44424970 | 0.40232134  | 1.73608200 |

2-a

|   |             |             |             |
|---|-------------|-------------|-------------|
| C | 0.48143852  | 0.44083526  | 0.00000000  |
| C | 1.19180452  | 2.65225426  | -0.21803700 |
| C | 2.56089652  | 2.27178726  | -0.20565800 |
| C | 2.84317752  | 0.88672826  | -0.08321200 |
| C | 1.81239152  | -0.02441774 | 0.01745800  |
| H | -0.36601948 | -0.23369174 | 0.07637500  |
| C | 0.78819852  | 4.01759726  | -0.34553400 |
| C | 3.54811452  | 3.28513226  | -0.31819600 |
| H | 3.87834152  | 0.55631826  | -0.07158400 |
| H | 2.00485252  | -1.08796574 | 0.10935500  |
| C | 3.15073252  | 4.59952626  | -0.43656900 |
| C | 1.78575752  | 4.97986126  | -0.45434200 |

|    |             |            |             |
|----|-------------|------------|-------------|
| H  | 4.59889152  | 3.01102926 | -0.31018700 |
| H  | 3.90020852  | 5.38190426 | -0.52151600 |
| H  | 1.52038252  | 6.02234826 | -0.55195900 |
| N  | 0.19220652  | 1.72753626 | -0.11134400 |
| N  | -0.60438448 | 4.20778326 | -0.33035100 |
| C  | -1.23577748 | 5.41796826 | -0.41094500 |
| O  | -0.68042848 | 6.51280626 | -0.55918400 |
| C  | -2.73309448 | 5.26918926 | -0.22992200 |
| H  | -2.95859048 | 5.60866726 | 0.78959700  |
| H  | -3.24618648 | 5.95507526 | -0.91437000 |
| C  | -3.20037448 | 3.83813626 | -0.42716900 |
| H  | -3.36971048 | 3.58904926 | -1.48105900 |
| Cu | -1.62180948 | 2.64400926 | -0.19070000 |
| C  | -4.30288548 | 3.36341226 | 0.48495500  |
| H  | -4.47707948 | 2.29829826 | 0.34083000  |
| H  | -4.01610648 | 3.52514026 | 1.53136800  |
| C  | -5.63222348 | 4.12475926 | 0.20467400  |
| H  | -5.48914948 | 5.19684826 | 0.37972800  |
| H  | -5.89422248 | 4.00248226 | -0.85206800 |
| C  | -6.73440048 | 3.60785726 | 1.10164100  |
| C  | -7.60251248 | 2.57225526 | 0.70123900  |

|   |              |            |             |
|---|--------------|------------|-------------|
| C | -6.88225448  | 4.13497326 | 2.39188500  |
| C | -8.54982748  | 2.05786926 | 1.59548800  |
| C | -7.83792148  | 3.63371326 | 3.27734700  |
| H | -6.23175248  | 4.94870426 | 2.70518200  |
| C | -8.66794348  | 2.58225426 | 2.88339600  |
| H | -9.18868648  | 1.23716826 | 1.28254400  |
| H | -7.92945448  | 4.06001726 | 4.27321500  |
| H | -9.40399948  | 2.17333326 | 3.57042900  |
| C | -7.43661548  | 1.92277126 | -0.64402000 |
| O | -6.42182848  | 1.23306926 | -0.86307300 |
| N | -8.39716348  | 2.04331026 | -1.59172900 |
| H | -8.15181948  | 1.51819426 | -2.42678200 |
| C | -9.52660648  | 3.00634526 | -1.77572700 |
| C | -10.72199748 | 2.66235726 | -0.87254500 |
| C | -9.06678548  | 4.45231326 | -1.53110200 |
| C | -9.94893148  | 2.85047026 | -3.24674000 |
| H | -11.00724148 | 1.60993626 | -0.98191600 |
| H | -10.50407948 | 2.85669726 | 0.18005600  |
| H | -11.58317148 | 3.28036426 | -1.15286400 |
| H | -8.21403448  | 4.70420126 | -2.17165300 |
| H | -9.88653748  | 5.14080726 | -1.76726800 |

|   |              |            |             |
|---|--------------|------------|-------------|
| H | -8.78113248  | 4.61879126 | -0.48909100 |
| H | -10.78137348 | 3.52594726 | -3.46888300 |
| H | -9.12199448  | 3.09557926 | -3.92428000 |
| H | -10.27934848 | 1.82572926 | -3.45702500 |
| F | -2.59651148  | 1.13550826 | -0.11688200 |

2-ts

Value of imaginary frequency = -1138.98 cm<sup>-1</sup>

|   |             |             |             |
|---|-------------|-------------|-------------|
| C | -0.52410901 | 0.05241090  | 0.00000000  |
| C | -1.64113901 | 1.45787990  | 1.48644200  |
| C | -2.66625801 | 0.48670690  | 1.69242300  |
| C | -2.55354501 | -0.74482610 | 0.99639000  |
| C | -1.48555901 | -0.96679110 | 0.15603300  |
| H | 0.32855599  | -0.08190610 | -0.66016900 |
| C | -1.67641701 | 2.72767090  | 2.17303800  |
| C | -3.74027501 | 0.78127890  | 2.57152300  |
| H | -3.31868501 | -1.50402310 | 1.13743000  |
| H | -1.37178101 | -1.89956010 | -0.38665200 |
| C | -3.76975101 | 2.00092390  | 3.21108500  |
| C | -2.75591701 | 2.96788990  | 3.02214000  |
| H | -4.52093701 | 0.04176390  | 2.72530600  |
| H | -4.58902301 | 2.23767490  | 3.88519600  |

|    |             |            |             |
|----|-------------|------------|-------------|
| H  | -2.81733401 | 3.91274690 | 3.54249400  |
| N  | -0.59692401 | 1.21441490 | 0.63348800  |
| N  | -0.59597701 | 3.57634690 | 1.92056200  |
| C  | -0.53854601 | 4.87478390 | 2.30318300  |
| O  | -1.40931201 | 5.52482090 | 2.91573700  |
| C  | 0.74708199  | 5.57710590 | 1.85915600  |
| H  | 0.56943499  | 6.06056090 | 0.88975300  |
| H  | 0.96049099  | 6.38745990 | 2.57258600  |
| C  | 1.94852999  | 4.69018990 | 1.79534000  |
| H  | 2.05137499  | 3.96113890 | 2.59871500  |
| Cu | 0.70807899  | 2.84987890 | 0.67748900  |
| C  | 3.05949499  | 4.90367090 | 0.96435800  |
| H  | 2.63412999  | 4.09084690 | 0.02669600  |
| H  | 3.06560899  | 5.84665390 | 0.41093100  |
| C  | 4.43804499  | 4.35837790 | 1.39623200  |
| H  | 5.16700899  | 5.17196490 | 1.30912800  |
| H  | 4.40165999  | 4.09053390 | 2.45660800  |
| C  | 4.92257799  | 3.17326090 | 0.58116900  |
| C  | 4.68736299  | 1.84728590 | 0.98999800  |
| C  | 5.58795899  | 3.38303490 | -0.63404000 |
| C  | 5.06965999  | 0.77358790 | 0.17580000  |

|   |            |             |             |
|---|------------|-------------|-------------|
| C | 5.98744799 | 2.31428290  | -1.43777000 |
| H | 5.78855199 | 4.40323690  | -0.95437700 |
| C | 5.72178599 | 1.00301490  | -1.03611800 |
| H | 4.85741099 | -0.24276910 | 0.49703000  |
| H | 6.50328799 | 2.50477890  | -2.37557100 |
| H | 6.02117699 | 0.16380490  | -1.65831500 |
| C | 3.89217899 | 1.54910690  | 2.23116100  |
| O | 2.64684299 | 1.48091090  | 2.14206700  |
| N | 4.49528499 | 1.35141790  | 3.41995300  |
| H | 3.82254999 | 1.12771290  | 4.14892500  |
| C | 5.92653299 | 1.26839090  | 3.84068700  |
| C | 6.61506999 | 0.05441090  | 3.19533100  |
| C | 6.69181299 | 2.55924590  | 3.51235400  |
| C | 5.88106099 | 1.08325290  | 5.36637500  |
| H | 6.04047899 | -0.86155410 | 3.37399400  |
| H | 6.73151999 | 0.18606990  | 2.11635800  |
| H | 7.61404899 | -0.07741410 | 3.62686900  |
| H | 6.20601999 | 3.43040390  | 3.96471200  |
| H | 7.70852599 | 2.48763890  | 3.91578400  |
| H | 6.77375999 | 2.72360490  | 2.43541000  |
| H | 6.89854499 | 1.02173290  | 5.76506600  |

|      |             |             |             |
|------|-------------|-------------|-------------|
| H    | 5.37520899  | 1.92699190  | 5.85121300  |
| H    | 5.35427099  | 0.16022190  | 5.63885200  |
| F    | 2.08607899  | 3.19087790  | -0.64092100 |
| 2-b1 |             |             |             |
| C    | -0.52410901 | 0.05241090  | 0.00000000  |
| C    | -1.64113901 | 1.45787990  | 1.48644200  |
| C    | -2.66625801 | 0.48670690  | 1.69242300  |
| C    | -2.55354501 | -0.74482610 | 0.99639000  |
| C    | -1.48555901 | -0.96679110 | 0.15603300  |
| H    | 0.32855599  | -0.08190610 | -0.66016900 |
| C    | -1.67641701 | 2.72767090  | 2.17303800  |
| C    | -3.74027501 | 0.78127890  | 2.57152300  |
| H    | -3.31868501 | -1.50402310 | 1.13743000  |
| H    | -1.37178101 | -1.89956010 | -0.38665200 |
| C    | -3.76975101 | 2.00092390  | 3.21108500  |
| C    | -2.75591701 | 2.96788990  | 3.02214000  |
| H    | -4.52093701 | 0.04176390  | 2.72530600  |
| H    | -4.58902301 | 2.23767490  | 3.88519600  |
| H    | -2.81733401 | 3.91274690  | 3.54249400  |
| N    | -0.59692401 | 1.21441490  | 0.63348800  |
| N    | -0.59597701 | 3.57634690  | 1.92056200  |

|    |             |            |             |
|----|-------------|------------|-------------|
| C  | -0.53854601 | 4.87478390 | 2.30318300  |
| O  | -1.40931201 | 5.52482090 | 2.91573700  |
| C  | 0.74708199  | 5.57710590 | 1.85915600  |
| H  | 0.56943499  | 6.06056090 | 0.88975300  |
| H  | 0.96049099  | 6.38745990 | 2.57258600  |
| C  | 1.94852999  | 4.69018990 | 1.79534000  |
| H  | 2.05137499  | 3.96113890 | 2.59871500  |
| Cu | 0.70807899  | 2.84987890 | 0.67748900  |
| C  | 3.05949499  | 4.90367090 | 0.96435800  |
| H  | 2.63412999  | 4.09084690 | 0.02669600  |
| H  | 3.06560899  | 5.84665390 | 0.41093100  |
| C  | 4.43804499  | 4.35837790 | 1.39623200  |
| H  | 5.16700899  | 5.17196490 | 1.30912800  |
| H  | 4.40165999  | 4.09053390 | 2.45660800  |
| C  | 4.92257799  | 3.17326090 | 0.58116900  |
| C  | 4.68736299  | 1.84728590 | 0.98999800  |
| C  | 5.58795899  | 3.38303490 | -0.63404000 |
| C  | 5.06965999  | 0.77358790 | 0.17580000  |
| C  | 5.98744799  | 2.31428290 | -1.43777000 |
| H  | 5.78855199  | 4.40323690 | -0.95437700 |
| C  | 5.72178599  | 1.00301490 | -1.03611800 |



|   |            |             |             |
|---|------------|-------------|-------------|
| H | 4.85741099 | -0.24276910 | 0.49703000  |
| H | 6.50328799 | 2.50477890  | -2.37557100 |
| H | 6.02117699 | 0.16380490  | -1.65831500 |
| C | 3.89217899 | 1.54910690  | 2.23116100  |
| O | 2.64684299 | 1.48091090  | 2.14206700  |
| N | 4.49528499 | 1.35141790  | 3.41995300  |
| H | 3.82254999 | 1.12771290  | 4.14892500  |
| C | 5.92653299 | 1.26839090  | 3.84068700  |
| C | 6.61506999 | 0.05441090  | 3.19533100  |
| C | 6.69181299 | 2.55924590  | 3.51235400  |
| C | 5.88106099 | 1.08325290  | 5.36637500  |
| H | 6.04047899 | -0.86155410 | 3.37399400  |
| H | 6.73151999 | 0.18606990  | 2.11635800  |
| H | 7.61404899 | -0.07741410 | 3.62686900  |
| H | 6.20601999 | 3.43040390  | 3.96471200  |
| H | 7.70852599 | 2.48763890  | 3.91578400  |
| H | 6.77375999 | 2.72360490  | 2.43541000  |
| H | 6.89854499 | 1.02173290  | 5.76506600  |
| H | 5.37520899 | 1.92699190  | 5.85121300  |
| H | 5.35427099 | 0.16022190  | 5.63885200  |
| F | 2.08607899 | 3.19087790  | -0.64092100 |

3-a

|   |             |             |             |
|---|-------------|-------------|-------------|
| C | -0.08700696 | 0.17401392  | 0.00000000  |
| C | -0.84565096 | -1.91691308 | -0.70805500 |
| C | -2.20359596 | -1.55604708 | -0.49539700 |
| C | -2.45437396 | -0.24757908 | -0.00723200 |
| C | -1.40500996 | 0.61290892  | 0.24025100  |
| H | 0.77360904  | 0.81229492  | 0.17791400  |
| C | -0.47550996 | -3.20763408 | -1.19965800 |
| C | -3.21300396 | -2.51167208 | -0.78146800 |
| H | -3.48062896 | 0.06388292  | 0.16819200  |
| H | -1.57271496 | 1.61750592  | 0.61332800  |
| C | -2.84786396 | -3.75361108 | -1.25448000 |
| C | -1.49444196 | -4.11474208 | -1.46764800 |
| H | -4.25536196 | -2.25039508 | -0.62480100 |
| H | -3.61445696 | -4.49115908 | -1.47620400 |
| H | -1.25306796 | -5.09985708 | -1.83979200 |
| N | 0.17307904  | -1.04208308 | -0.45354100 |
| N | 0.91102304  | -3.39355808 | -1.34007600 |
| C | 1.50584304  | -4.50571408 | -1.86831300 |
| O | 0.91433404  | -5.49969008 | -2.30347100 |
| C | 3.01999304  | -4.40511308 | -1.83362900 |

|    |            |             |             |
|----|------------|-------------|-------------|
| H  | 3.36605504 | -5.17833108 | -1.13626300 |
| H  | 3.40281704 | -4.67674008 | -2.82398400 |
| C  | 3.51793504 | -3.03278708 | -1.40750200 |
| H  | 3.84535404 | -2.41025508 | -2.24423500 |
| Cu | 1.95430704 | -1.90225508 | -0.90488300 |
| C  | 4.47922604 | -2.99904208 | -0.24460300 |
| H  | 4.64590404 | -1.97101408 | 0.07478000  |
| H  | 4.07896304 | -3.56365008 | 0.60575800  |
| C  | 5.85232604 | -3.60798208 | -0.66555600 |
| H  | 5.76332304 | -4.69610808 | -0.75452400 |
| H  | 6.11732904 | -3.22840308 | -1.65825500 |
| C  | 6.92506904 | -3.24970008 | 0.33587600  |
| C  | 7.69089204 | -2.07502408 | 0.19201500  |
| C  | 7.14782204 | -4.05585708 | 1.45957100  |
| C  | 8.61806804 | -1.70891208 | 1.17435700  |
| C  | 8.08403304 | -3.69863608 | 2.43243700  |
| H  | 6.57510204 | -4.97388708 | 1.57196100  |
| C  | 8.81554904 | -2.51694908 | 2.29574300  |
| H  | 9.18314504 | -0.78812708 | 1.05959900  |
| H  | 8.23851204 | -4.33975208 | 3.29670700  |
| H  | 9.53738204 | -2.22510808 | 3.05393200  |

|   |             |             |             |
|---|-------------|-------------|-------------|
| C | 7.41448104  | -1.13569008 | -0.95088400 |
| O | 6.37721204  | -0.44559408 | -0.92339500 |
| N | 8.28757904  | -1.01272608 | -1.97644200 |
| H | 7.95638504  | -0.33678908 | -2.65966100 |
| C | 9.43576904  | -1.85123408 | -2.43583200 |
| C | 10.63808904 | -1.74030308 | -1.48483300 |
| C | 9.01254404  | -3.32021808 | -2.59888800 |
| C | 9.82693404  | -1.27612508 | -3.80734500 |
| H | 10.89480504 | -0.69153808 | -1.29803300 |
| H | 10.44648804 | -2.22769308 | -0.52616900 |
| H | 11.50750704 | -2.23042108 | -1.93828300 |
| H | 8.16312404  | -3.40886608 | -3.28537000 |
| H | 9.84688304  | -3.90027808 | -3.01021700 |
| H | 8.73384904  | -3.76804408 | -1.64117700 |
| H | 10.66060004 | -1.84810708 | -4.22692800 |
| H | 8.98982004  | -1.32896708 | -4.51459200 |
| H | 10.14315204 | -0.22925708 | -3.72179900 |
| O | 3.00271404  | -0.39156508 | -0.49298800 |
| C | 3.38592404  | 0.36455192  | -1.48331200 |
| O | 3.18260404  | 0.10653592  | -2.68080100 |
| C | 4.07244704  | 1.64725392  | -1.05982800 |

|   |            |            |             |
|---|------------|------------|-------------|
| H | 4.61757604 | 1.51186192 | -0.12418600 |
| H | 4.75091504 | 1.98503092 | -1.84568600 |
| H | 3.30620104 | 2.41709992 | -0.90755800 |

3-ts

Value of imaginary frequency = -1373.96 cm<sup>-1</sup>

|   |            |            |             |
|---|------------|------------|-------------|
| C | 1.07966455 | 0.92243186 | 0.00000000  |
| C | 2.10192855 | 1.23230286 | 2.07297300  |
| C | 3.18612555 | 1.94283686 | 1.47785700  |
| C | 3.15528055 | 2.12419086 | 0.07051900  |
| C | 2.10908755 | 1.61744186 | -0.66814000 |
| H | 0.23988755 | 0.49672986 | -0.54246500 |
| C | 2.05924755 | 1.00429386 | 3.49759100  |
| C | 4.23409155 | 2.43148186 | 2.30071000  |
| H | 3.96667455 | 2.66414486 | -0.41090000 |
| H | 2.06268955 | 1.74037786 | -1.74526700 |
| C | 4.18241455 | 2.20771986 | 3.65923900  |
| C | 3.11400555 | 1.50276386 | 4.26014000  |
| H | 5.05936255 | 2.97290586 | 1.84713900  |
| H | 4.97970155 | 2.57912386 | 4.29823000  |
| H | 3.11375355 | 1.34535486 | 5.32950900  |
| N | 1.07383155 | 0.74142086 | 1.31291600  |

|    |             |             |            |
|----|-------------|-------------|------------|
| N  | 0.93075755  | 0.32409786  | 3.96091200 |
| C  | 0.82531155  | -0.22596814 | 5.19367400 |
| O  | 1.69090455  | -0.24202914 | 6.09224000 |
| C  | -0.51425845 | -0.93120314 | 5.42964900 |
| H  | -0.42329245 | -1.98247414 | 5.12693400 |
| H  | -0.71126045 | -0.94002514 | 6.51227100 |
| C  | -1.68257045 | -0.28319014 | 4.75599600 |
| H  | -1.65803845 | 0.80561586  | 4.70611700 |
| Cu | -0.35988845 | -0.12353614 | 2.57707400 |
| C  | -2.89393045 | -0.90972114 | 4.43784000 |
| H  | -2.59038845 | -1.13685114 | 3.15547100 |
| H  | -3.00503745 | -1.94580414 | 4.77177400 |
| C  | -4.17283945 | -0.05589714 | 4.45889900 |
| H  | -4.68890445 | -0.25201014 | 5.40838100 |
| H  | -3.88664045 | 0.99992286  | 4.48285000 |
| C  | -5.14147045 | -0.30021514 | 3.31971200 |
| C  | -5.26170745 | 0.60724186  | 2.25000300 |
| C  | -5.96017045 | -1.43745814 | 3.32210400 |
| C  | -6.15574245 | 0.35345886  | 1.20136500 |
| C  | -6.85682445 | -1.68786614 | 2.28219200 |
| H  | -5.89201145 | -2.13434914 | 4.15467800 |

|   |             |             |            |
|---|-------------|-------------|------------|
| C | -6.95330745 | -0.79204114 | 1.21439100 |
| H | -6.22209745 | 1.05415486  | 0.37373100 |
| H | -7.47809545 | -2.57953714 | 2.30583000 |
| H | -7.64346445 | -0.98138614 | 0.39667100 |
| C | -4.33524045 | 1.78931386  | 2.14993200 |
| O | -3.15016745 | 1.59619886  | 1.81046100 |
| N | -4.77822145 | 3.04213486  | 2.38914300 |
| H | -4.03680845 | 3.72584086  | 2.25951000 |
| C | -6.01799045 | 3.57849886  | 3.02870600 |
| C | -7.25077945 | 3.38107286  | 2.13210500 |
| C | -6.24586445 | 2.93821986  | 4.40724400 |
| C | -5.75405645 | 5.08330786  | 3.20297200 |
| H | -7.06966245 | 3.77116886  | 1.12423600 |
| H | -7.53213145 | 2.32839686  | 2.05305200 |
| H | -8.10305345 | 3.92188686  | 2.55976000 |
| H | -5.36885345 | 3.07234086  | 5.04992800 |
| H | -7.10382645 | 3.41391386  | 4.89649100 |
| H | -6.45886545 | 1.86885586  | 4.32646300 |
| H | -6.61673945 | 5.56114786  | 3.67788300 |
| H | -4.87692445 | 5.25997886  | 3.83776100 |
| H | -5.58661545 | 5.57035786  | 2.23443300 |

|   |             |             |             |
|---|-------------|-------------|-------------|
| O | -1.92838445 | -1.12229814 | 2.04894000  |
| C | -2.27525345 | -1.51345114 | 0.82932100  |
| O | -1.59594245 | -1.21564814 | -0.15200600 |
| C | -3.54404945 | -2.31707514 | 0.73692400  |
| H | -3.67546345 | -2.95485714 | 1.61363200  |
| H | -4.38993645 | -1.62416314 | 0.68848200  |
| H | -3.53362245 | -2.91725814 | -0.17521600 |

3-b1

|   |             |             |             |
|---|-------------|-------------|-------------|
| C | 0.24848484  | 0.22424242  | 0.00000000  |
| C | 0.74018284  | -1.87599258 | 0.89897700  |
| C | -0.59959816 | -2.31770958 | 0.66755400  |
| C | -1.50805916 | -1.40046458 | 0.07933600  |
| C | -1.09041616 | -0.13167158 | -0.25236600 |
| H | 0.61575084  | 1.21426942  | -0.25402200 |
| C | 1.71784184  | -2.75771358 | 1.50937900  |
| C | -0.97884816 | -3.63652758 | 1.02673800  |
| H | -2.53268016 | -1.71533358 | -0.10220900 |
| H | -1.76306916 | 0.59194042  | -0.70116900 |
| C | -0.04235316 | -4.46926558 | 1.59809800  |
| C | 1.28269684  | -4.04599758 | 1.83946300  |
| H | -1.99811816 | -3.96566858 | 0.84578400  |



|    |             |             |            |
|----|-------------|-------------|------------|
| H  | -0.31938016 | -5.48335558 | 1.87684400 |
| H  | 1.98529684  | -4.72989358 | 2.29255600 |
| N  | 1.12839784  | -0.60601958 | 0.54985000 |
| N  | 2.98402084  | -2.21709558 | 1.69909900 |
| C  | 3.99929384  | -2.87795258 | 2.30172100 |
| O  | 4.00272984  | -4.05413858 | 2.73598800 |
| C  | 5.25099184  | -2.01245658 | 2.47825900 |
| H  | 5.33475484  | -1.33570858 | 1.62580500 |
| H  | 5.06302384  | -1.36955558 | 3.35287200 |
| C  | 6.54308884  | -2.75311458 | 2.66050100 |
| H  | 6.59704484  | -3.48167958 | 3.46942500 |
| Cu | 3.08021284  | -0.27206958 | 0.94540400 |
| C  | 7.60923384  | -2.50277558 | 1.89611700 |
| H  | 7.52247484  | -1.77001258 | 1.09490500 |
| C  | 8.99331384  | -3.07823558 | 2.07084800 |
| H  | 8.98566184  | -3.87646358 | 2.82197800 |
| H  | 9.33334984  | -3.52260458 | 1.12679300 |
| C  | 9.95715684  | -1.98079758 | 2.50058600 |
| C  | 10.54848484 | -1.10485758 | 1.56961600 |
| C  | 10.22513084 | -1.77987558 | 3.86131000 |
| C  | 11.35139084 | -0.04276058 | 2.00458400 |

|   |             |             |             |
|---|-------------|-------------|-------------|
| C | 11.04399984 | -0.73568158 | 4.29448200  |
| H | 9.77682584  | -2.45160458 | 4.58988600  |
| C | 11.60460384 | 0.14243642  | 3.36425200  |
| H | 11.77947584 | 0.63708342  | 1.27257200  |
| H | 11.23820484 | -0.60500158 | 5.35615600  |
| H | 12.23411084 | 0.96552142  | 3.69196600  |
| C | 10.21409384 | -1.19520958 | 0.10509900  |
| O | 9.16415284  | -0.65913858 | -0.30676800 |
| N | 11.03792184 | -1.82067058 | -0.76132900 |
| H | 10.68360984 | -1.77320158 | -1.71297600 |
| C | 12.31576784 | -2.57666958 | -0.59936200 |
| C | 13.45493684 | -1.65354858 | -0.13708100 |
| C | 12.14972884 | -3.75549858 | 0.37235800  |
| C | 12.63869684 | -3.11775458 | -2.00205100 |
| H | 13.54039084 | -0.77872458 | -0.79174800 |
| H | 13.30451084 | -1.30776358 | 0.88852800  |
| H | 14.40466584 | -2.20014358 | -0.16947400 |
| H | 11.34336984 | -4.42149658 | 0.04628400  |
| H | 13.07942284 | -4.33537658 | 0.40353200  |
| H | 11.93434884 | -3.41759358 | 1.38928500  |
| H | 13.56970284 | -3.69269458 | -1.97470300 |

|   |             |             |             |
|---|-------------|-------------|-------------|
| H | 11.84108484 | -3.77799558 | -2.36419200 |
| H | 12.76651284 | -2.29963358 | -2.72186600 |
| O | 4.75749684  | 0.90981342  | 0.64592100  |
| H | 5.18991584  | 0.88580542  | -0.22518900 |
| C | 5.58778284  | 1.32906842  | 1.65631100  |
| O | 5.13661284  | 1.34457542  | 2.78094400  |
| C | 6.97558284  | 1.71735742  | 1.24598200  |
| H | 7.51044384  | 0.84717542  | 0.84686500  |
| H | 6.93625684  | 2.47555742  | 0.45646900  |
| H | 7.50957984  | 2.10692942  | 2.11274600  |

3-b2

|   |             |             |             |
|---|-------------|-------------|-------------|
| C | 0.67865430  | 0.24361949  | 0.00000000  |
| C | -0.74090270 | 1.90878349  | -0.78757500 |
| C | -1.88993870 | 1.09159649  | -0.55987600 |
| C | -1.67603470 | -0.20929851 | -0.03464700 |
| C | -0.39652570 | -0.63784051 | 0.23993000  |
| H | 1.70083230  | -0.05912651 | 0.21290800  |
| C | -0.88240370 | 3.23838249  | -1.34500400 |
| C | -3.18122970 | 1.59919649  | -0.86127700 |
| H | -2.53181270 | -0.85529251 | 0.14500700  |
| H | -0.20224070 | -1.62822651 | 0.63912500  |

|    |             |            |             |
|----|-------------|------------|-------------|
| C  | -3.30318770 | 2.87394949 | -1.37139700 |
| C  | -2.17520670 | 3.69005749 | -1.61434400 |
| H  | -4.05271370 | 0.97501049 | -0.68444400 |
| H  | -4.28931570 | 3.26863649 | -1.60416400 |
| H  | -2.30841470 | 4.68273049 | -2.02308900 |
| N  | 0.51877230  | 1.46726049 | -0.48299700 |
| N  | 0.30781530  | 3.90751549 | -1.55921000 |
| C  | 0.43419530  | 5.23499749 | -1.72748900 |
| O  | -0.46892270 | 6.09836749 | -1.82011200 |
| C  | 1.91440230  | 5.66758049 | -1.80639100 |
| H  | 2.25392330  | 5.52702449 | -2.84094000 |
| H  | 1.96109230  | 6.74024149 | -1.58715200 |
| C  | 2.80278330  | 4.89174549 | -0.86099300 |
| H  | 2.64273130  | 5.08738349 | 0.20139100  |
| Cu | 2.06928930  | 2.87727649 | -1.13883400 |
| C  | 3.85626030  | 4.10080449 | -1.23221300 |
| H  | 4.12040230  | 4.02687349 | -2.28724200 |
| C  | 4.86729330  | 3.50816049 | -0.26947900 |
| H  | 4.54675730  | 3.69561149 | 0.76169300  |
| H  | 4.89920830  | 2.42209149 | -0.40094500 |
| C  | 6.24844930  | 4.09360749 | -0.50097800 |

|   |            |             |             |
|---|------------|-------------|-------------|
| C | 7.15820030 | 3.48914349  | -1.38887000 |
| C | 6.63136630 | 5.27541849  | 0.14565000  |
| C | 8.40308230 | 4.08058149  | -1.63791500 |
| C | 7.87717930 | 5.85851049  | -0.09235700 |
| H | 5.93888530 | 5.74316549  | 0.84210500  |
| C | 8.76463830 | 5.26388549  | -0.99250100 |
| H | 9.08722830 | 3.61112849  | -2.33913000 |
| H | 8.15283230 | 6.77556549  | 0.42209000  |
| H | 9.73286130 | 5.71575749  | -1.19076100 |
| C | 6.74742030 | 2.28405649  | -2.19059300 |
| O | 5.94197930 | 2.43745849  | -3.13076300 |
| N | 7.27841330 | 1.06685649  | -1.93664400 |
| H | 6.91949130 | 0.36659249  | -2.57939500 |
| C | 7.97967030 | 0.50242549  | -0.74333900 |
| C | 9.39508230 | 1.07828849  | -0.58397200 |
| C | 7.15304130 | 0.73561849  | 0.53143700  |
| C | 8.08045330 | -1.00667151 | -1.01834000 |
| H | 9.96826330 | 0.96961149  | -1.51134300 |
| H | 9.37776330 | 2.13461149  | -0.30693000 |
| H | 9.92138530 | 0.53426349  | 0.20896000  |
| H | 6.14163230 | 0.32918149  | 0.41797900  |

|   |            |             |             |
|---|------------|-------------|-------------|
| H | 7.63117830 | 0.23284649  | 1.38009000  |
| H | 7.07783130 | 1.79953549  | 0.77259200  |
| H | 8.58350030 | -1.50532651 | -0.18376100 |
| H | 7.08648730 | -1.45744851 | -1.13070300 |
| H | 8.65686130 | -1.20507951 | -1.93002400 |
| O | 3.21653530 | 1.06734849  | -1.84040600 |
| C | 3.47493130 | 0.88415849  | -3.02838300 |
| C | 4.22862730 | -0.29619651 | -3.55451700 |
| H | 3.52282030 | -0.97208551 | -4.05080900 |
| H | 4.96366330 | 0.03138349  | -4.29262700 |
| H | 4.71461130 | -0.82062651 | -2.73165700 |
| O | 3.06286430 | 1.71610949  | -3.98978000 |
| H | 2.55706630 | 2.44751949  | -3.58352200 |

1-b3, 2-b3, 3-b3 without small molecule

|   |             |             |             |
|---|-------------|-------------|-------------|
| C | -0.17979898 | -0.15081206 | 0.00235369  |
| C | 1.36229302  | -1.89831606 | -0.14410831 |
| C | 2.45223802  | -0.97945206 | -0.17972231 |
| C | 2.15016702  | 0.40494194  | -0.10984431 |
| C | 0.84065202  | 0.82038594  | -0.01787831 |
| H | -1.22317698 | 0.14332994  | 0.06555869  |
| C | 1.60549102  | -3.32456806 | -0.21261731 |

|    |             |             |             |
|----|-------------|-------------|-------------|
| C  | 3.77970102  | -1.47416306 | -0.28475631 |
| H  | 2.96304302  | 1.12643594  | -0.13206831 |
| H  | 0.57905802  | 1.87199794  | 0.03431469  |
| C  | 3.99478402  | -2.83403006 | -0.35508231 |
| C  | 2.92530102  | -3.75747906 | -0.32026131 |
| H  | 4.60604102  | -0.76959906 | -0.30876731 |
| H  | 5.00954602  | -3.21543906 | -0.43615731 |
| H  | 3.12321802  | -4.82061106 | -0.37533131 |
| N  | 0.05967902  | -1.45573206 | -0.05710631 |
| N  | 0.46128302  | -4.09299806 | -0.15463331 |
| C  | 0.30664002  | -5.37700406 | -0.52474031 |
| O  | 1.18589202  | -6.19574606 | -0.86869031 |
| C  | -1.18814798 | -5.77138706 | -0.59578631 |
| H  | -1.46698798 | -5.71794206 | -1.65636031 |
| H  | -1.29164498 | -6.81874306 | -0.28909231 |
| C  | -2.10786198 | -4.88856806 | 0.22824869  |
| H  | -2.07720298 | -5.07367906 | 1.30518169  |
| Cu | -1.24092998 | -3.03868806 | 0.01538369  |
| C  | -3.09530698 | -4.05177106 | -0.25030931 |
| H  | -3.27154098 | -3.99146006 | -1.32482631 |
| C  | -4.18647098 | -3.45473906 | 0.62229269  |

|   |             |             |             |
|---|-------------|-------------|-------------|
| H | -3.94472298 | -3.62546906 | 1.67756469  |
| H | -4.22838798 | -2.37053806 | 0.47745969  |
| C | -5.53516498 | -4.06975606 | 0.29253269  |
| C | -6.38874598 | -3.48453306 | -0.66214331 |
| C | -5.94088798 | -5.25728406 | 0.91365369  |
| C | -7.59789098 | -4.10255106 | -1.00357131 |
| C | -7.15370798 | -5.86586306 | 0.58474169  |
| H | -5.29333198 | -5.71004806 | 1.66130469  |
| C | -7.98209298 | -5.29221606 | -0.38255431 |
| H | -8.23408898 | -3.65326706 | -1.76067831 |
| H | -7.44903598 | -6.78705206 | 1.08052569  |
| H | -8.92188698 | -5.76586106 | -0.65329931 |
| C | -5.93521298 | -2.26720006 | -1.41962931 |
| O | -5.02955398 | -2.39066506 | -2.26834831 |
| N | -6.51709998 | -1.06417106 | -1.21273931 |
| H | -6.11895498 | -0.35373706 | -1.82065931 |
| C | -7.37890398 | -0.53000606 | -0.11475431 |
| C | -8.81817998 | -1.05930206 | -0.21730131 |
| C | -6.78203498 | -0.85471606 | 1.26433869  |
| C | -7.38368498 | 0.99439594  | -0.31896931 |
| H | -9.23012298 | -0.88688406 | -1.21806831 |



|   |             |             |             |
|---|-------------|-------------|-------------|
| H | -8.87245998 | -2.12826806 | 0.00178369  |
| H | -9.45317598 | -0.53792506 | 0.50845169  |
| H | -5.75396098 | -0.48355906 | 1.34214369  |
| H | -7.37978798 | -0.37045206 | 2.04508569  |
| H | -6.78086698 | -1.92938906 | 1.46447869  |
| H | -7.99735498 | 1.47187994  | 0.45148669  |
| H | -6.36942898 | 1.40635194  | -0.24875231 |
| H | -7.80017798 | 1.26190394  | -1.29785431 |

## References

- (1) Groendyke J B, Cook P S, et al. Iron-Catalyzed, Fluoroamide-directed C-H fluorination, *J. Am. Chem. Soc.*, **2014**, *138*, 12771-12774
- (2) 8. Derosa J, Liu M, Engle K M, et al. Directed nickel-catalyzed 1,2-dialkylation of alkenyl carbonyl compounds[J]. *Chem. Sci.*, **2018**, *9*, 5278–5283.
